# Supplementary material
Source: PubMed Central journal article supplement (PMC4217424)

## Batch 1

|                                                                | Sample# | ID#/DOD           |
|----------------------------------------------------------------|---------|-------------------|
| C57Bl6 p53+/+ Female 3 months (liver)                          | 1       | 10690 (1/7/10)    |
| 129Sv <sup>SL</sup> p53+/+ Male 3 months (liver)               | 2       | 10295 (2/12/10)   |
| C57Bl6/129Sv <sup>SL</sup> p53+/+ embryo (17.5 embryo)         | 3       | pup 10 (1/7/2010) |
| C57Bl6/129Sv <sup>SL</sup> p53+/+ embryo (17.5 embryo)         | 4       | pup 11 (1/7/2010) |
| C57Bl6/129Sv <sup>SL</sup> p53+/+ embryo (17.5 embryo)         | 5       | pup 12 (1/7/2010) |
| C57Bl6/129Sv <sup>SL</sup> p53+/+ embryo (17.5 embryo)         | 6       | pup 13 (1/7/2010) |
| C57Bl6/129Sv <sup>SL</sup> p53+/+ embryo (17.5 embryo)         | 7       | pup 14 (1/7/2010) |
| C57Bl6/129Sv <sup>SL</sup> p53+/+ embryo (17.5 embryo)         | 8       | pup 15 (1/7/2010) |
| C57Bl6/129Sv <sup>SL</sup> p53+/+ embryo (17.5 embryo)         | 9       | pup 16 (1/7/2010) |
| C57Bl6/129Sv <sup>SL</sup> p53+/+ embryo (17.5 embryo)         | 10      | pup 17 (1/7/2010) |
| C57Bl6 p53+/+ Female 9 months (liver)                          | 11      | 10000 (1/24/10)   |
| 129Sv <sup>SL</sup> p53+/+ Male 3 months (liver)               | 12      | 11043 (1/24/10)   |
| C57Bl6/129Sv <sup>SL</sup> p53+/+ embryo (17.5 embryo)         | 13      | pup 28 (1/24/10)  |
| C57Bl6/129Sv <sup>SL</sup> p53+/+ embryo (17.5 embryo)         | 14      | pup 29 (1/24/10)  |
| C57Bl6/129Sv <sup>SL</sup> p53+/+ embryo (17.5 embryo)         | 15      | pup 30 (1/24/10)  |
| C57Bl6/129Sv <sup>SL</sup> p53+/+ embryo (17.5 embryo)         | 16      | pup 31 (1/24/10)  |
| C57Bl6 p53+/+ Female 12 months (liver)                         | 17      | 10010 (5/13/10)   |
| 129Sv <sup>SL</sup> p53+/+ Male 3 months (liver)               | 18      | 12086 (5/13/10)   |
| C57Bl6/129Sv <sup>SL</sup> p53+/+ embryo (17.5 embryo)         | 19      | pup 186 (5/13/10) |
| C57Bl6/129Sv <sup>SL</sup> p53+/+ embryo (17.5 embryo)         | 20      | pup 187 (5/13/10) |
| C57Bl6/129Sv <sup>SL</sup> p53+/+ embryo (17.5 embryo)         | 21      | pup 188 (5/13/10) |
| C57Bl6/129Sv <sup>SL</sup> p53+/+ embryo (17.5 embryo)         | 22      | pup 189 (5/13/10) |
| C57Bl6/129Sv <sup>SL</sup> p53+/+ embryo (17.5 embryo)         | 23      | pup 190 (5/13/10) |
| C57Bl6 p53+/- Female 3 months (liver)                          | 24      | 12168 (4/19/10)   |
| 129Sv <sup>SL</sup> p53+/+ Male 3 months (liver)               | 25      | 11862 (4/25/10)   |
| C57Bl6/129Sv <sup>SL</sup> p53+/+ORp53+/- embryo (17.5 embryo) | 26      | pup 110 (4/19/10) |
| C57Bl6/129Sv <sup>SL</sup> p53+/+ORp53+/- embryo (17.5 embryo) | 27      | pup 111 (4/19/10) |
| C57Bl6/129Sv <sup>SL</sup> p53+/+ORp53+/- embryo (17.5 embryo) | 28      | pup 112 (4/19/10) |
| C57Bl6/129Sv <sup>SL</sup> p53+/+ORp53+/- embryo (17.5 embryo) | 29      | pup 113 (4/19/10) |
| C57Bl6/129Sv <sup>SL</sup> p53+/+ORp53+/- embryo (17.5 embryo) | 30      | pup 114 (4/19/10) |
| C57Bl6 p53+/- Female 9 months (liver)                          | 31      | 10700 (7/8/10)    |
| 129Sv <sup>SL</sup> p53+/+ Male 3 months (liver)               | 32      | 13161 (7/8/10)    |
| C57Bl6/129Sv <sup>SL</sup> p53+/+ORp53+/- embryo (17.5 embryo) | 33      | pup 307 (7/8/10)  |
| C57Bl6/129Sv <sup>SL</sup> p53+/+ORp53+/- embryo (17.5 embryo) | 34      | pup 308 (7/8/10)  |
| C57Bl6 p53+/- Female 12 months (liver)                         | 35      | 10699 (10/15/10)  |
| 129Sv <sup>SL</sup> p53+/+ Male 3 months (liver)               | 36      | 13978 (10/15/10)  |

|                                                                |    |                     |
|----------------------------------------------------------------|----|---------------------|
| C57Bl6/129Sv <sup>SL</sup> p53+/+ORp53+/- embryo (17.5 embryo) | 37 | 10699-E1 (10/15/10) |
| C57Bl6/129Sv <sup>SL</sup> p53+/+ORp53+/- embryo (17.5 embryo) | 38 | 10699-E2 (10/15/10) |
|                                                                |    |                     |
| C57Bl6 p53-/- Female 3 months (liver)                          | 39 | 13175 (6/19/10)     |
| 129Sv <sup>SL</sup> p53+/+ Male 3 months (liver)               | 40 | 13021 (6/19/10)     |
| C57Bl6/129Sv <sup>SL</sup> p53+/- embryo (17.5 embryo)         | 41 | pup 234 (6/19/10)   |
| C57Bl6/129Sv <sup>SL</sup> p53+/- embryo (17.5 embryo)         | 42 | pup 235 (6/19/10)   |
| C57Bl6/129Sv <sup>SL</sup> p53+/- embryo (17.5 embryo)         | 43 | pup 236 (6/19/10)   |
| C57Bl6/129Sv <sup>SL</sup> p53+/- embryo (17.5 embryo)         | 44 | pup 237 (6/19/10)   |
| C57Bl6/129Sv <sup>SL</sup> p53+/- embryo (17.5 embryo)         | 45 | pup 238 (6/19/10)   |

## Batch 2

|                                                        | Sample# | ID#/DOD           |
|--------------------------------------------------------|---------|-------------------|
| C57Bl6 p53+/+ Male 3 months (liver)                    | 1       | 14741 (1/3/11)    |
| 129Sv <sup>SL</sup> p53+/+ Female 3 months (liver)     | 2       | 14905 (1/3/11)    |
| C57Bl6/129Sv <sup>SL</sup> p53+/+ embryo (17.5 embryo) | 3       | 14905-E1 (1/3/11) |
| C57Bl6/129Sv <sup>SL</sup> p53+/+ embryo (17.5 embryo) | 4       | 14905-E2 (1/3/11) |
| C57Bl6/129Sv <sup>SL</sup> p53+/+ embryo (17.5 embryo) | 5       | 14905-E3 (1/3/11) |
| C57Bl6/129Sv <sup>SL</sup> p53+/+ embryo (17.5 embryo) | 6       | 14905-E4 (1/3/11) |

|                                                        |    |                   |
|--------------------------------------------------------|----|-------------------|
| C57Bl6 p53+/+ Male 9 months (liver)                    | 7  | 10985 (7/27/10)   |
| 129Sv <sup>SL</sup> p53+/+ Female 3 months (liver)     | 8  | 13382 (7/27/10)   |
| C57Bl6/129Sv <sup>SL</sup> p53+/+ embryo (17.5 embryo) | 9  | pup 314 (7/27/10) |
| C57Bl6/129Sv <sup>SL</sup> p53+/+ embryo (17.5 embryo) | 10 | pup 315 (7/27/10) |
| C57Bl6/129Sv <sup>SL</sup> p53+/+ embryo (17.5 embryo) | 11 | pup 316 (7/27/10) |
| C57Bl6/129Sv <sup>SL</sup> p53+/+ embryo (17.5 embryo) | 12 | pup 317 (7/27/10) |
| C57Bl6/129Sv <sup>SL</sup> p53+/+ embryo (17.5 embryo) | 13 | pup 318 (7/27/10) |
| C57Bl6/129Sv <sup>SL</sup> p53+/+ embryo (17.5 embryo) | 14 | pup 319 (7/27/10) |
| C57Bl6/129Sv <sup>SL</sup> p53+/+ embryo (17.5 embryo) | 15 | pup 320 (7/27/10) |
| C57Bl6/129Sv <sup>SL</sup> p53+/+ embryo (17.5 embryo) | 16 | pup 321 (7/27/10) |

|                                                        |    |                    |
|--------------------------------------------------------|----|--------------------|
| C57Bl6 p53+/+ Male 12 months (liver)                   | 17 | 12128 (1/31/11)    |
| 129Sv <sup>SL</sup> p53+/+ Female 3 months (liver)     | 18 | 14845 (1/31/11)    |
| C57Bl6/129Sv <sup>SL</sup> p53+/+ embryo (17.5 embryo) | 19 | 14845-E1 (1/31/11) |
| C57Bl6/129Sv <sup>SL</sup> p53+/+ embryo (17.5 embryo) | 20 | 14845-E2 (1/31/11) |
| C57Bl6/129Sv <sup>SL</sup> p53+/+ embryo (17.5 embryo) | 21 | 14845-E3 (1/31/11) |
| C57Bl6/129Sv <sup>SL</sup> p53+/+ embryo (17.5 embryo) | 22 | 14845-E4 (1/31/11) |
| C57Bl6/129Sv <sup>SL</sup> p53+/+ embryo (17.5 embryo) | 23 | 14845-E5 (1/31/11) |
| C57Bl6/129Sv <sup>SL</sup> p53+/+ embryo (17.5 embryo) | 24 | 14845-E6 (1/31/11) |
| C57Bl6/129Sv <sup>SL</sup> p53+/+ embryo (17.5 embryo) | 25 | 14845-E7 (1/31/11) |

|                                                                |    |                  |
|----------------------------------------------------------------|----|------------------|
| C57Bl6 p53+/- Male 3 months (liver)                            | 26 | 12456 (5/2/10)   |
| 129Sv <sup>SL</sup> p53+/+ Female 3 months (liver)             | 27 | 12616 (5/2/10)   |
| C57Bl6/129Sv <sup>SL</sup> p53+/+ORp53+/- embryo (17.5 embryo) | 28 | pup 161 (5/2/10) |
| C57Bl6/129Sv <sup>SL</sup> p53+/+ORp53+/- embryo (17.5 embryo) | 29 | pup 162 (5/2/10) |
| C57Bl6/129Sv <sup>SL</sup> p53+/+ORp53+/- embryo (17.5 embryo) | 30 | pup 163 (5/2/10) |
| C57Bl6/129Sv <sup>SL</sup> p53+/+ORp53+/- embryo (17.5 embryo) | 31 | pup 164 (5/2/10) |
| C57Bl6/129Sv <sup>SL</sup> p53+/+ORp53+/- embryo (17.5 embryo) | 32 | pup 165 (5/2/10) |
| C57Bl6/129Sv <sup>SL</sup> p53+/+ORp53+/- embryo (17.5 embryo) | 33 | pup 166 (5/2/10) |

|                                                                |    |                    |
|----------------------------------------------------------------|----|--------------------|
| C57Bl6 p53+/- Male 9 months (liver)                            | 34 | 12482 (11/8/10)    |
| 129Sv <sup>SL</sup> p53+/+ Female 3 months (liver)             | 35 | 13907 (11/8/10)    |
| C57Bl6/129Sv <sup>SL</sup> p53+/+ORp53+/- embryo (17.5 embryo) | 36 | 13907-E1 (11/8/10) |
| C57Bl6/129Sv <sup>SL</sup> p53+/+ORp53+/- embryo (17.5 embryo) | 37 | 13907-E2 (11/8/10) |

|                                                                |    |                    |
|----------------------------------------------------------------|----|--------------------|
| C57Bl6/129Sv <sup>SL</sup> p53+/+ORp53+/- embryo (17.5 embryo) | 38 | 13907-E3 (11/8/10) |
| C57Bl6/129Sv <sup>SL</sup> p53+/+ORp53+/- embryo (17.5 embryo) | 39 | 13907-E4 (11/8/10) |
| C57Bl6/129Sv <sup>SL</sup> p53+/+ORp53+/- embryo (17.5 embryo) | 40 | 13907-E5 (11/8/10) |
| C57Bl6/129Sv <sup>SL</sup> p53+/+ORp53+/- embryo (17.5 embryo) | 41 | 13907-E6 (11/8/10) |
| C57Bl6/129Sv <sup>SL</sup> p53+/+ORp53+/- embryo (17.5 embryo) | 42 | 13907-E7 (11/8/10) |

|                                                                |    |                     |
|----------------------------------------------------------------|----|---------------------|
| C57Bl6 p53+/- Male 12 months (liver)                           | 43 | 10607 (11/9/10)     |
| 129Sv <sup>SL</sup> p53+/+ Female 3 months (liver)             | 44 | 13980 (10/18/10)    |
| C57Bl6/129Sv <sup>SL</sup> p53+/+ORp53+/- embryo (17.5 embryo) | 45 | 13908-E1 (10/18/10) |
| C57Bl6/129Sv <sup>SL</sup> p53+/+ORp53+/- embryo (17.5 embryo) | 46 | 13908-E2 (10/18/10) |
| C57Bl6/129Sv <sup>SL</sup> p53+/+ORp53+/- embryo (17.5 embryo) | 47 | 13908-E3 (10/18/10) |
| C57Bl6/129Sv <sup>SL</sup> p53+/+ORp53+/- embryo (17.5 embryo) | 48 | 13908-E4 (10/18/10) |
| C57Bl6/129Sv <sup>SL</sup> p53+/+ORp53+/- embryo (17.5 embryo) | 49 | 13908-E5 (10/18/10) |

|                                                        |    |                   |
|--------------------------------------------------------|----|-------------------|
| C57Bl6 p53-/- Male 3 months (liver)                    | 50 | 12483 (5/17/10)   |
| 129Sv <sup>SL</sup> p53+/+ Female 3 months (liver)     | 51 | 12775 (5/17/10)   |
| C57Bl6/129Sv <sup>SL</sup> p53+/- embryo (17.5 embryo) | 52 | pup 205 (5/17/10) |
| C57Bl6/129Sv <sup>SL</sup> p53+/- embryo (17.5 embryo) | 53 | pup 206 (5/17/10) |
| C57Bl6/129Sv <sup>SL</sup> p53+/- embryo (17.5 embryo) | 54 | pup 207 (5/17/10) |
| C57Bl6/129Sv <sup>SL</sup> p53+/- embryo (17.5 embryo) | 55 | pup 208 (5/17/10) |
| C57Bl6/129Sv <sup>SL</sup> p53+/- embryo (17.5 embryo) | 56 | pup 209 (5/17/10) |
| C57Bl6/129Sv <sup>SL</sup> p53+/- embryo (17.5 embryo) | 57 | pup 210 (5/17/10) |

## Batch 3

|                                                        | Sample# | ID#/DOD         |
|--------------------------------------------------------|---------|-----------------|
| 129Sv <sup>SL</sup> p53-/- Female 3 months (liver)     | 1       | 12429 (5/2/10)  |
| C57Bl6 p53+/+ Male 3 months (liver)                    | 2       | 12389 (5/3/10)  |
| C57Bl6/129Sv <sup>SL</sup> p53+/- embryo (17.5 embryo) | 3       | pup156 (5/2/10) |
| C57Bl6/129Sv <sup>SL</sup> p53+/- embryo (17.5 embryo) | 4       | pup157 (5/2/10) |
| C57Bl6/129Sv <sup>SL</sup> p53+/- embryo (17.5 embryo) | 5       | pup158 (5/2/10) |
| C57Bl6/129Sv <sup>SL</sup> p53+/- embryo (17.5 embryo) | 6       | pup159 (5/2/10) |
| C57Bl6/129Sv <sup>SL</sup> p53+/- embryo (17.5 embryo) | 7       | pup160 (5/2/10) |

|                                                        |    |                 |
|--------------------------------------------------------|----|-----------------|
| 129Sv <sup>SL</sup> p53-/- Female 3 months (liver)     | 8  | 12430 (5/3/10)  |
| C57Bl6 p53+/+ Male 3 months (liver)                    | 9  | 12390 (5/3/10)  |
| C57Bl6/129Sv <sup>SL</sup> p53+/- embryo (17.5 embryo) | 10 | pup176 (5/3/10) |
| C57Bl6/129Sv <sup>SL</sup> p53+/- embryo (17.5 embryo) | 11 | pup177 (5/3/10) |
| C57Bl6/129Sv <sup>SL</sup> p53+/- embryo (17.5 embryo) | 12 | pup178 (5/3/10) |

|                                                        |    |                  |
|--------------------------------------------------------|----|------------------|
| 129Sv <sup>SL</sup> p53-/- Male 3 months (liver)       | 13 | 12420 (4/30/10)  |
| C57Bl6 p53+/+ Female 3 months (liver)                  | 14 | 12406 (4/30/10)  |
| C57Bl6/129Sv <sup>SL</sup> p53+/- embryo (17.5 embryo) | 15 | pup138 (4/30/10) |
| C57Bl6/129Sv <sup>SL</sup> p53+/- embryo (17.5 embryo) | 16 | pup139 (4/30/10) |
| C57Bl6/129Sv <sup>SL</sup> p53+/- embryo (17.5 embryo) | 17 | pup140 (4/30/10) |
| C57Bl6/129Sv <sup>SL</sup> p53+/- embryo (17.5 embryo) | 18 | pup141 (4/30/10) |
| C57Bl6/129Sv <sup>SL</sup> p53+/- embryo (17.5 embryo) | 19 | pup142 (4/30/10) |
| C57Bl6/129Sv <sup>SL</sup> p53+/- embryo (17.5 embryo) | 20 | pup143 (4/30/10) |
| C57Bl6/129Sv <sup>SL</sup> p53+/- embryo (17.5 embryo) | 21 | pup144 (4/30/10) |

|                                                        |    |                  |
|--------------------------------------------------------|----|------------------|
| 129Sv <sup>SL</sup> p53-/- Male 3 months (liver)       | 22 | 12419 (4/30/10)  |
| C57Bl6 p53+/+ Female 3 months (liver)                  | 23 | 12407 (4/30/10)  |
| C57Bl6/129Sv <sup>SL</sup> p53+/- embryo (17.5 embryo) | 24 | pup128 (4/30/10) |
| C57Bl6/129Sv <sup>SL</sup> p53+/- embryo (17.5 embryo) | 25 | pup129 (4/30/10) |
| C57Bl6/129Sv <sup>SL</sup> p53+/- embryo (17.5 embryo) | 26 | pup130 (4/30/10) |
| C57Bl6/129Sv <sup>SL</sup> p53+/- embryo (17.5 embryo) | 27 | pup131 (4/30/10) |
| C57Bl6/129Sv <sup>SL</sup> p53+/- embryo (17.5 embryo) | 28 | pup132 (4/30/10) |
| C57Bl6/129Sv <sup>SL</sup> p53+/- embryo (17.5 embryo) | 29 | pup133 (4/30/10) |
| C57Bl6/129Sv <sup>SL</sup> p53+/- embryo (17.5 embryo) | 30 | pup134 (4/30/10) |
| C57Bl6/129Sv <sup>SL</sup> p53+/- embryo (17.5 embryo) | 31 | pup135 (4/30/10) |
| C57Bl6/129Sv <sup>SL</sup> p53+/- embryo (17.5 embryo) | 32 | pup136 (4/30/10) |
| C57Bl6/129Sv <sup>SL</sup> p53+/- embryo (17.5 embryo) | 33 | pup137 (4/30/10) |

|                                                        |    |                  |
|--------------------------------------------------------|----|------------------|
| 129Sv <sup>SL</sup> p53-/- Male 3 months (liver)       | 34 | 12417 (4/30/10)  |
| C57Bl6 p53+/+ Female 3 months (liver)                  | 35 | 12405 (4/30/10)  |
| C57Bl6/129Sv <sup>SL</sup> p53+/- embryo (17.5 embryo) | 36 | pup145 (4/30/10) |
| C57Bl6/129Sv <sup>SL</sup> p53+/- embryo (17.5 embryo) | 37 | pup146 (4/30/10) |

|                                                        |    |                  |
|--------------------------------------------------------|----|------------------|
| C57Bl6/129Sv <sup>SL</sup> p53+/- embryo (17.5 embryo) | 38 | pup147 (4/30/10) |
| C57Bl6/129Sv <sup>SL</sup> p53+/- embryo (17.5 embryo) | 39 | pup148 (4/30/10) |
| C57Bl6/129Sv <sup>SL</sup> p53+/- embryo (17.5 embryo) | 40 | pup149 (4/30/10) |
| C57Bl6/129Sv <sup>SL</sup> p53+/- embryo (17.5 embryo) | 41 | pup150 (4/30/10) |
| C57Bl6/129Sv <sup>SL</sup> p53+/- embryo (17.5 embryo) | 42 | pup151 (4/30/10) |

|                                                        |    |                  |
|--------------------------------------------------------|----|------------------|
| C57Bl6 p53-/- Male 3 months (liver)                    | 43 | 12480 (5/17/10)  |
| 129Sv <sup>SL</sup> p53+/+ Female 3 months (liver)     | 44 | 12774 (5/17/10)  |
| C57Bl6/129Sv <sup>SL</sup> p53+/- embryo (17.5 embryo) | 45 | pup197 (5/17/10) |
| C57Bl6/129Sv <sup>SL</sup> p53+/- embryo (17.5 embryo) | 46 | pup198 (5/17/10) |
| C57Bl6/129Sv <sup>SL</sup> p53+/- embryo (17.5 embryo) | 47 | pup199 (5/17/10) |
| C57Bl6/129Sv <sup>SL</sup> p53+/- embryo (17.5 embryo) | 48 | pup200 (5/17/10) |
| C57Bl6/129Sv <sup>SL</sup> p53+/- embryo (17.5 embryo) | 49 | pup201 (5/17/10) |
| C57Bl6/129Sv <sup>SL</sup> p53+/- embryo (17.5 embryo) | 50 | pup202 (5/17/10) |
| C57Bl6/129Sv <sup>SL</sup> p53+/- embryo (17.5 embryo) | 51 | pup203 (5/17/10) |
| C57Bl6/129Sv <sup>SL</sup> p53+/- embryo (17.5 embryo) | 52 | pup204 (5/17/10) |

|                                                        |    |                  |
|--------------------------------------------------------|----|------------------|
| C57Bl6 p53-/- Male 3 months (liver)                    | 53 | 12484 (5/16/10)  |
| 129Sv <sup>SL</sup> p53+/+ Female 3 months (liver)     | 54 | 12776 (5/16/10)  |
| C57Bl6/129Sv <sup>SL</sup> p53+/- embryo (17.5 embryo) | 55 | pup191 (5/16/10) |
| C57Bl6/129Sv <sup>SL</sup> p53+/- embryo (17.5 embryo) | 56 | pup192 (5/16/10) |
| C57Bl6/129Sv <sup>SL</sup> p53+/- embryo (17.5 embryo) | 57 | pup193 (5/16/10) |
| C57Bl6/129Sv <sup>SL</sup> p53+/- embryo (17.5 embryo) | 58 | pup194 (5/16/10) |
| C57Bl6/129Sv <sup>SL</sup> p53+/- embryo (17.5 embryo) | 59 | pup195 (5/16/10) |
| C57Bl6/129Sv <sup>SL</sup> p53+/- embryo (17.5 embryo) | 60 | pup196 (5/16/10) |

# Batch1

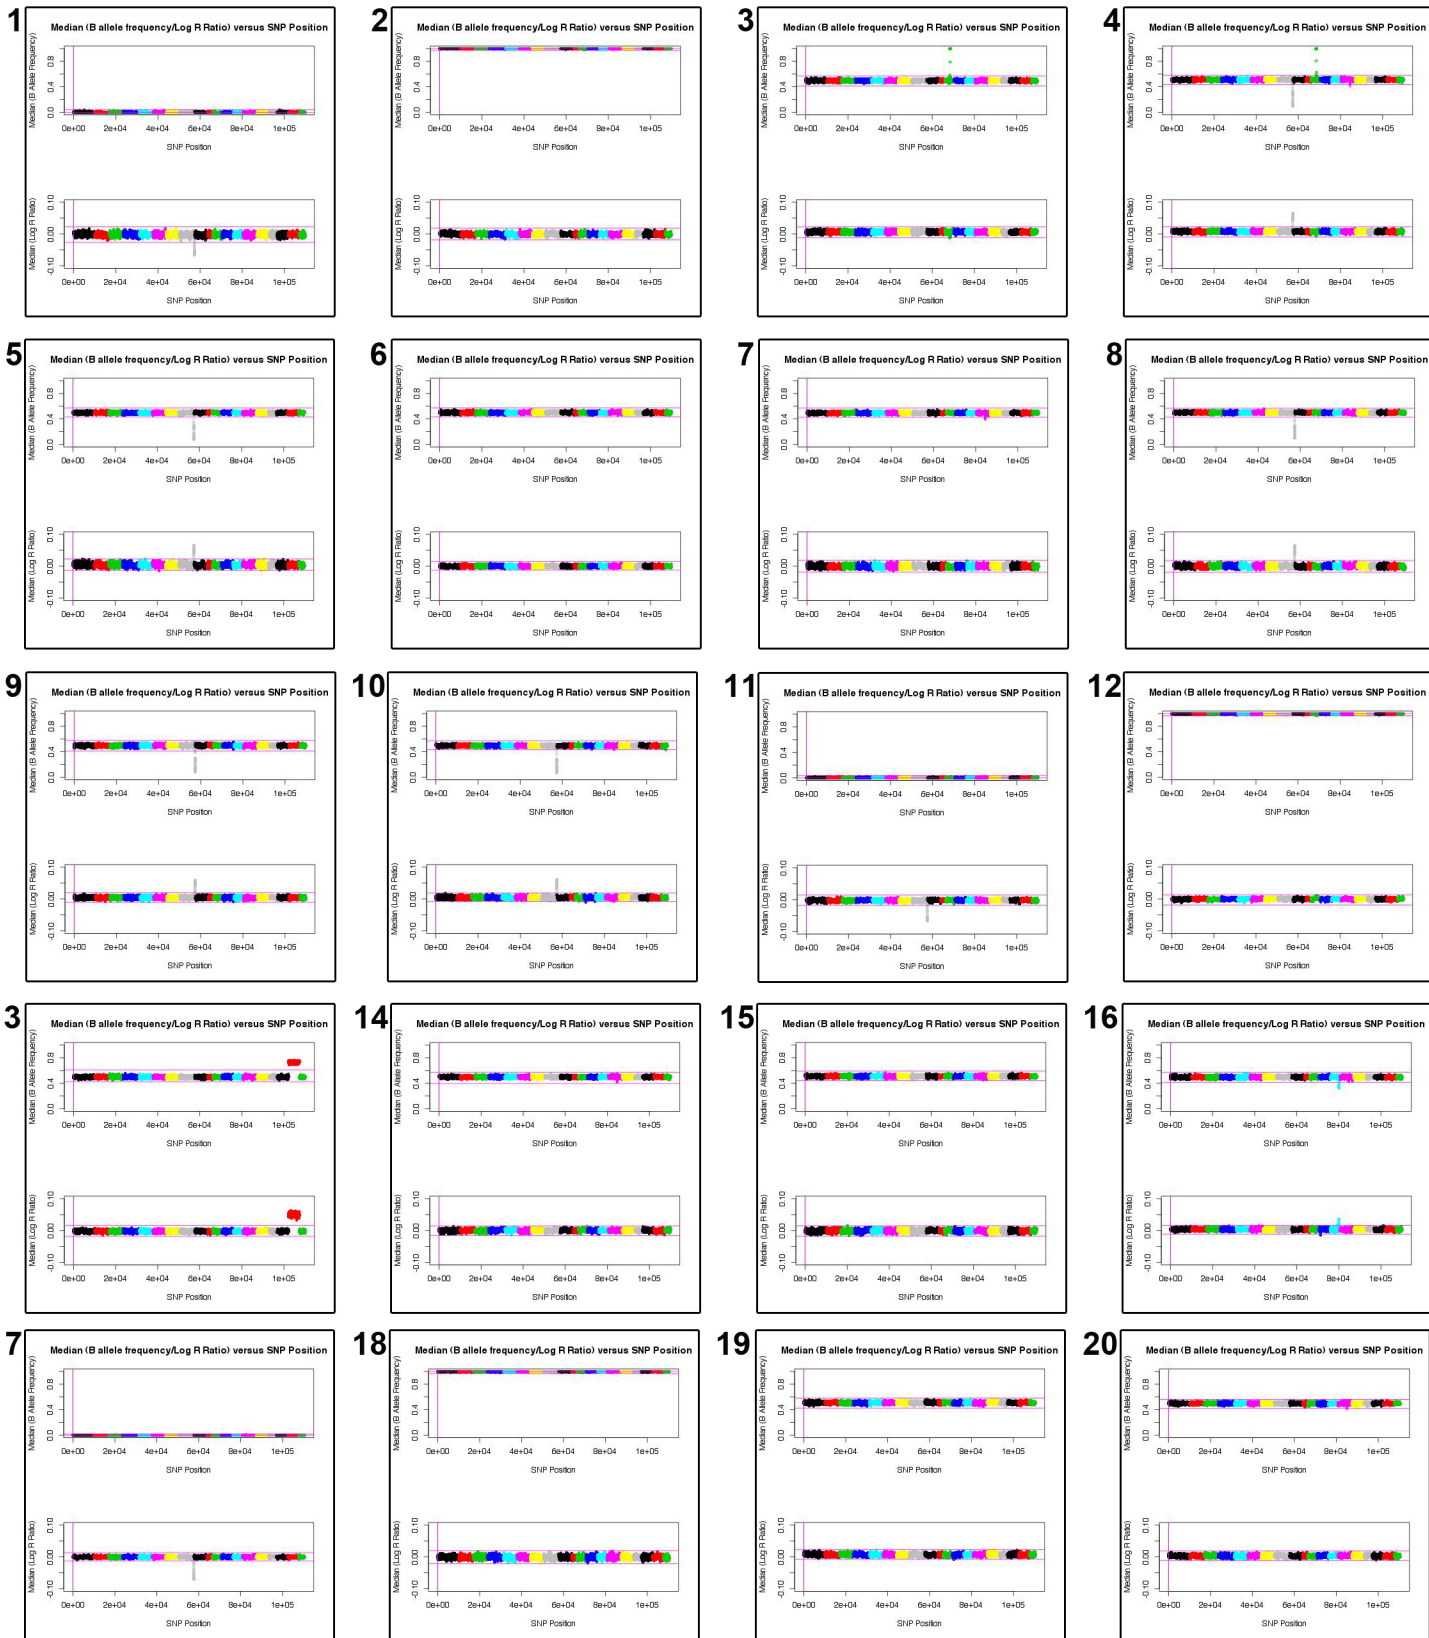

# Batch1

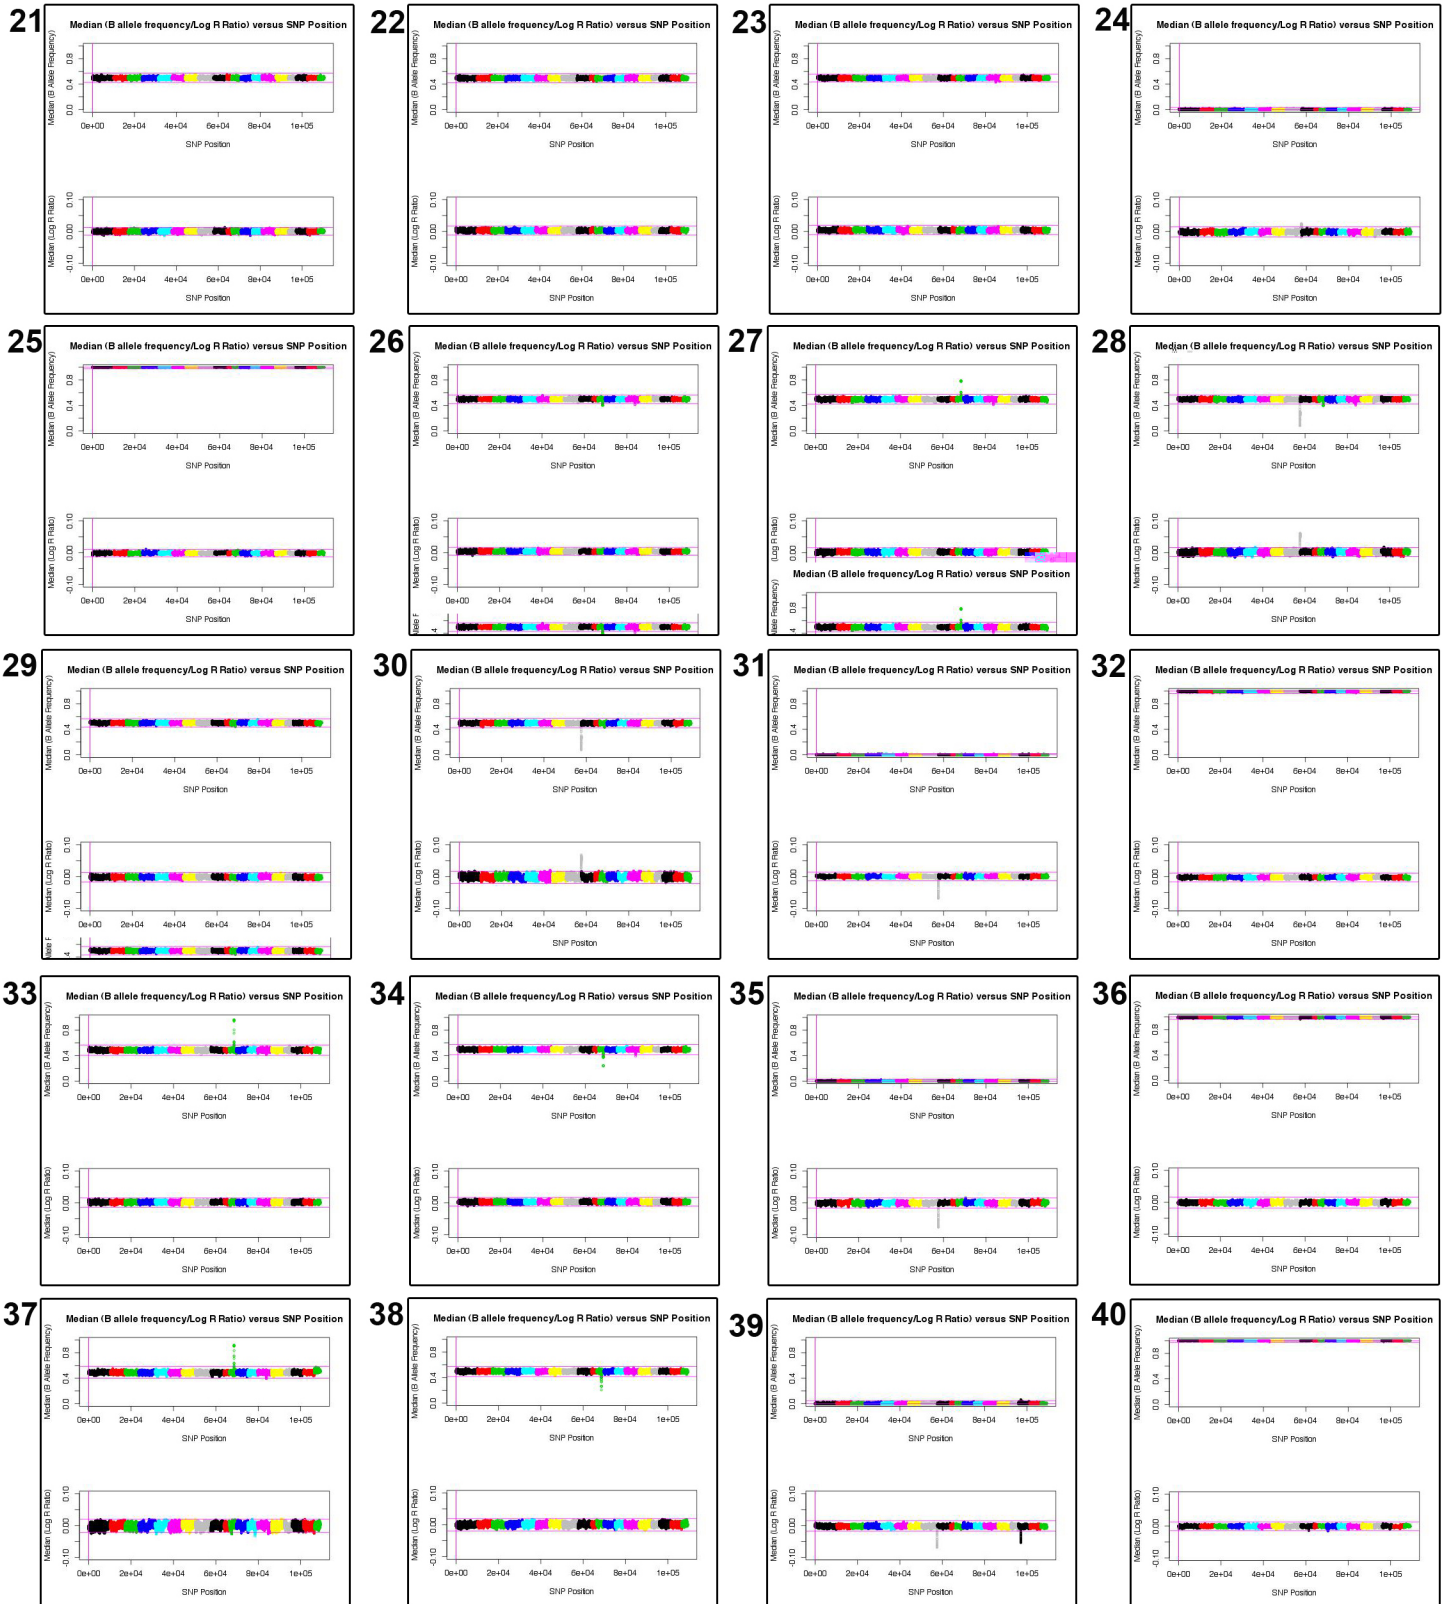



# Batch 1

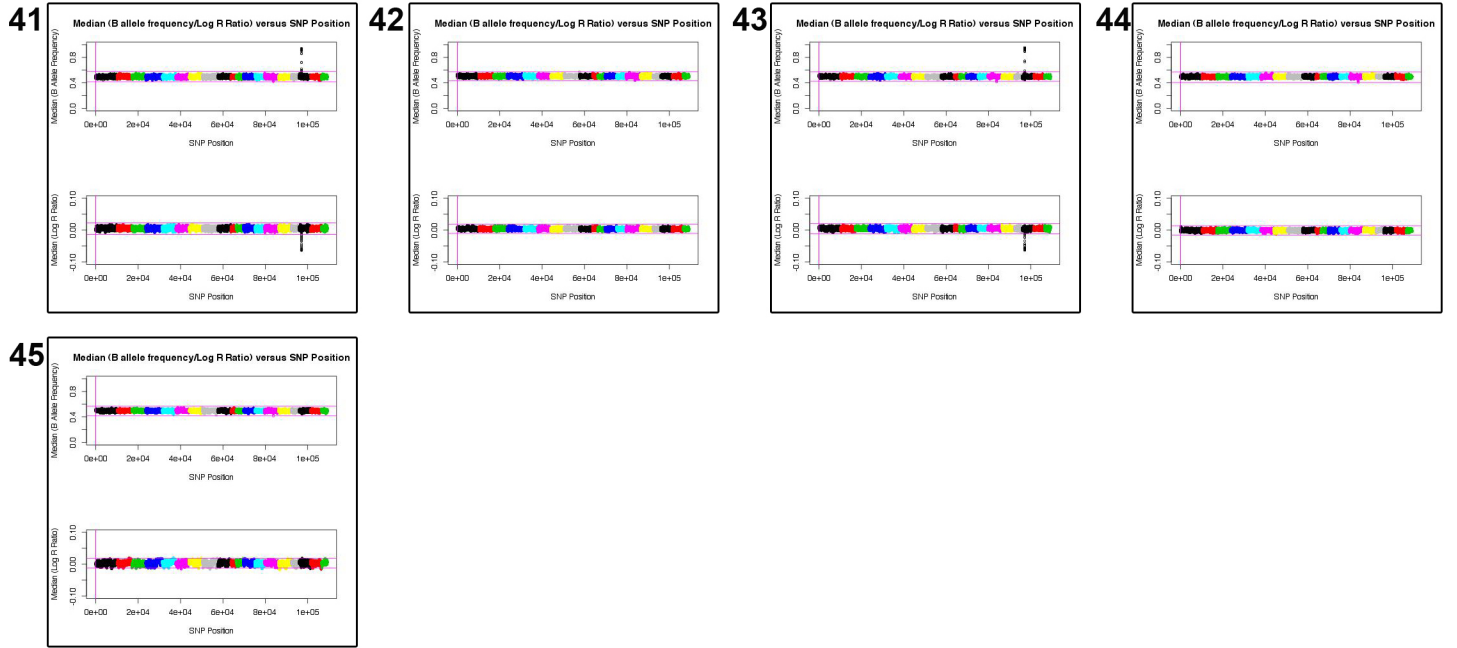

# Batch 2

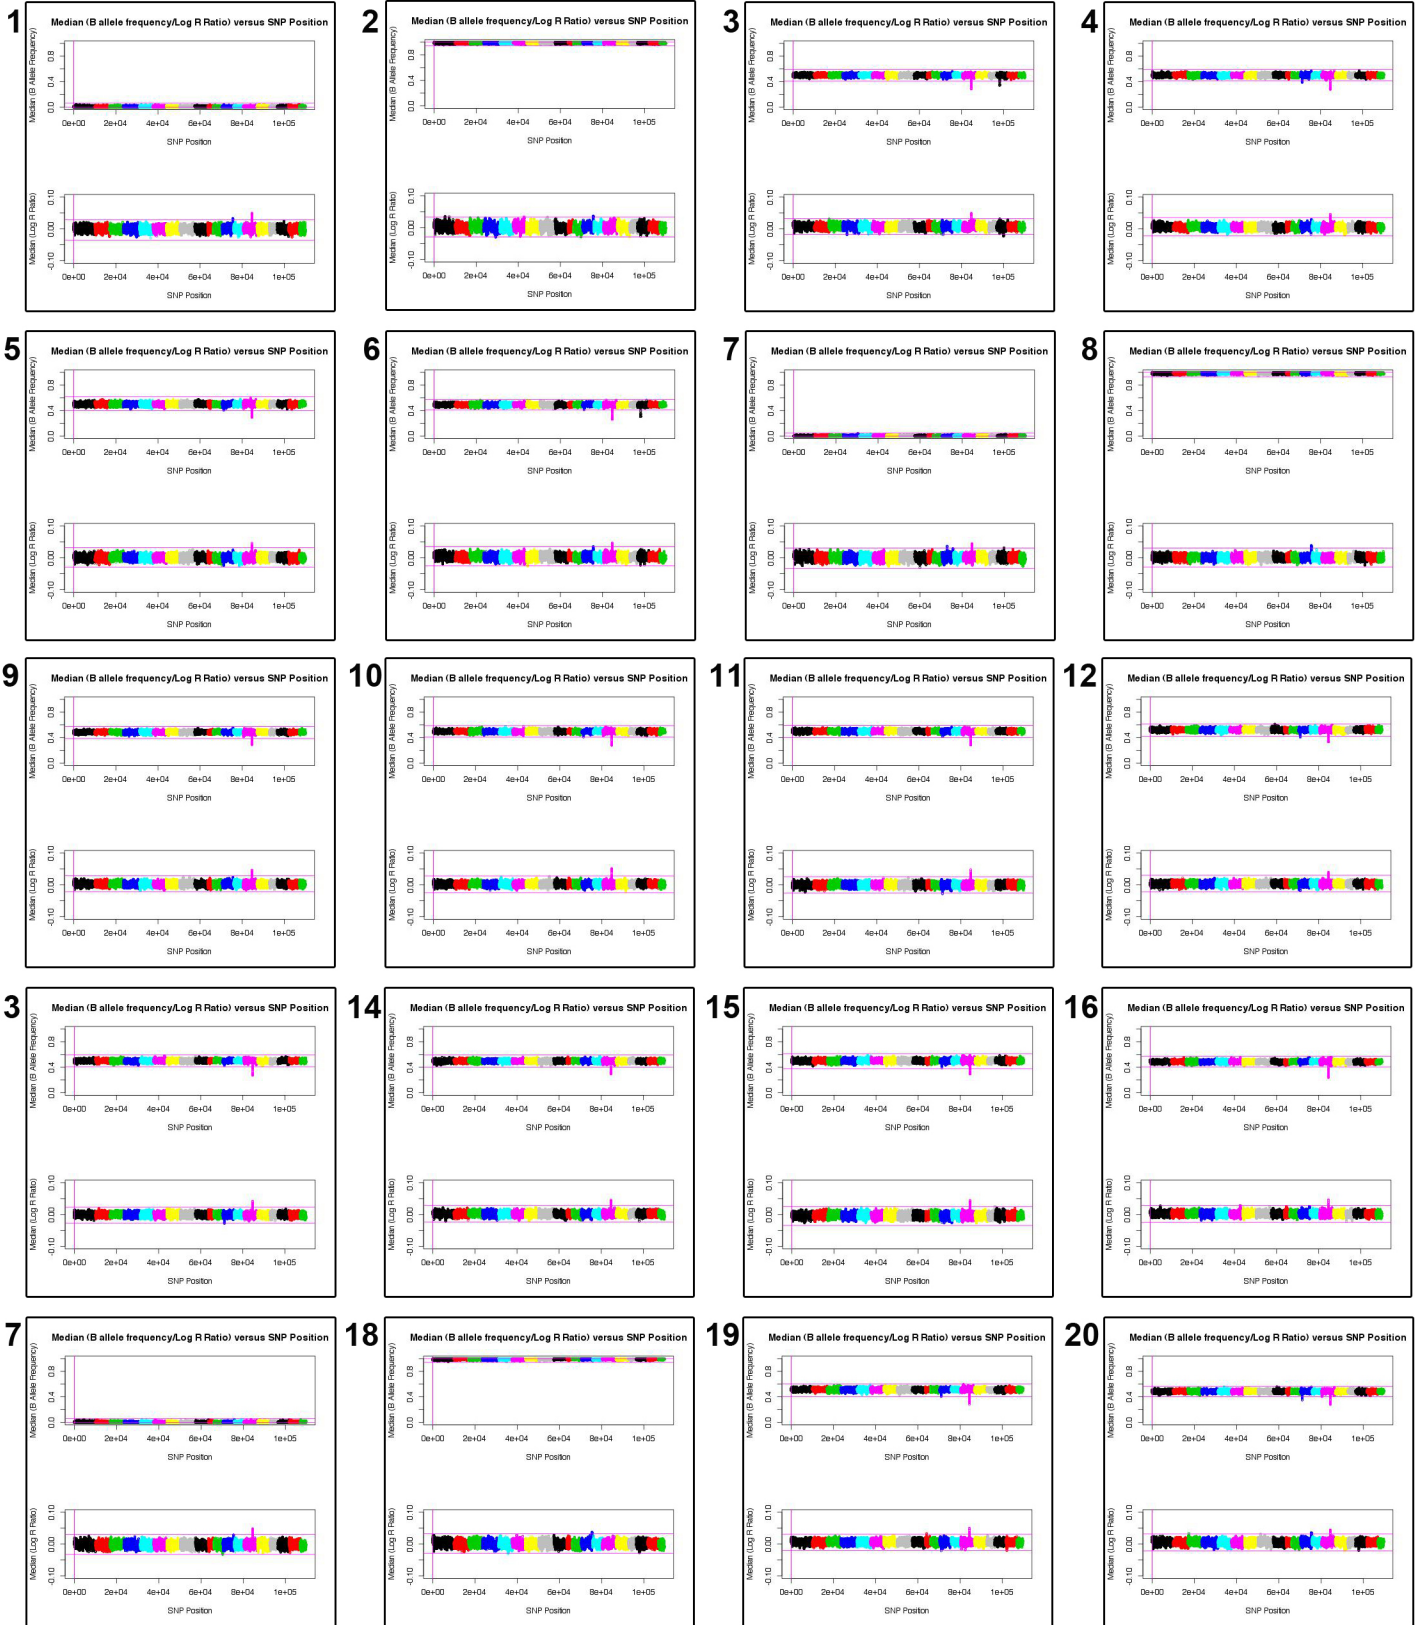

# Batch 2

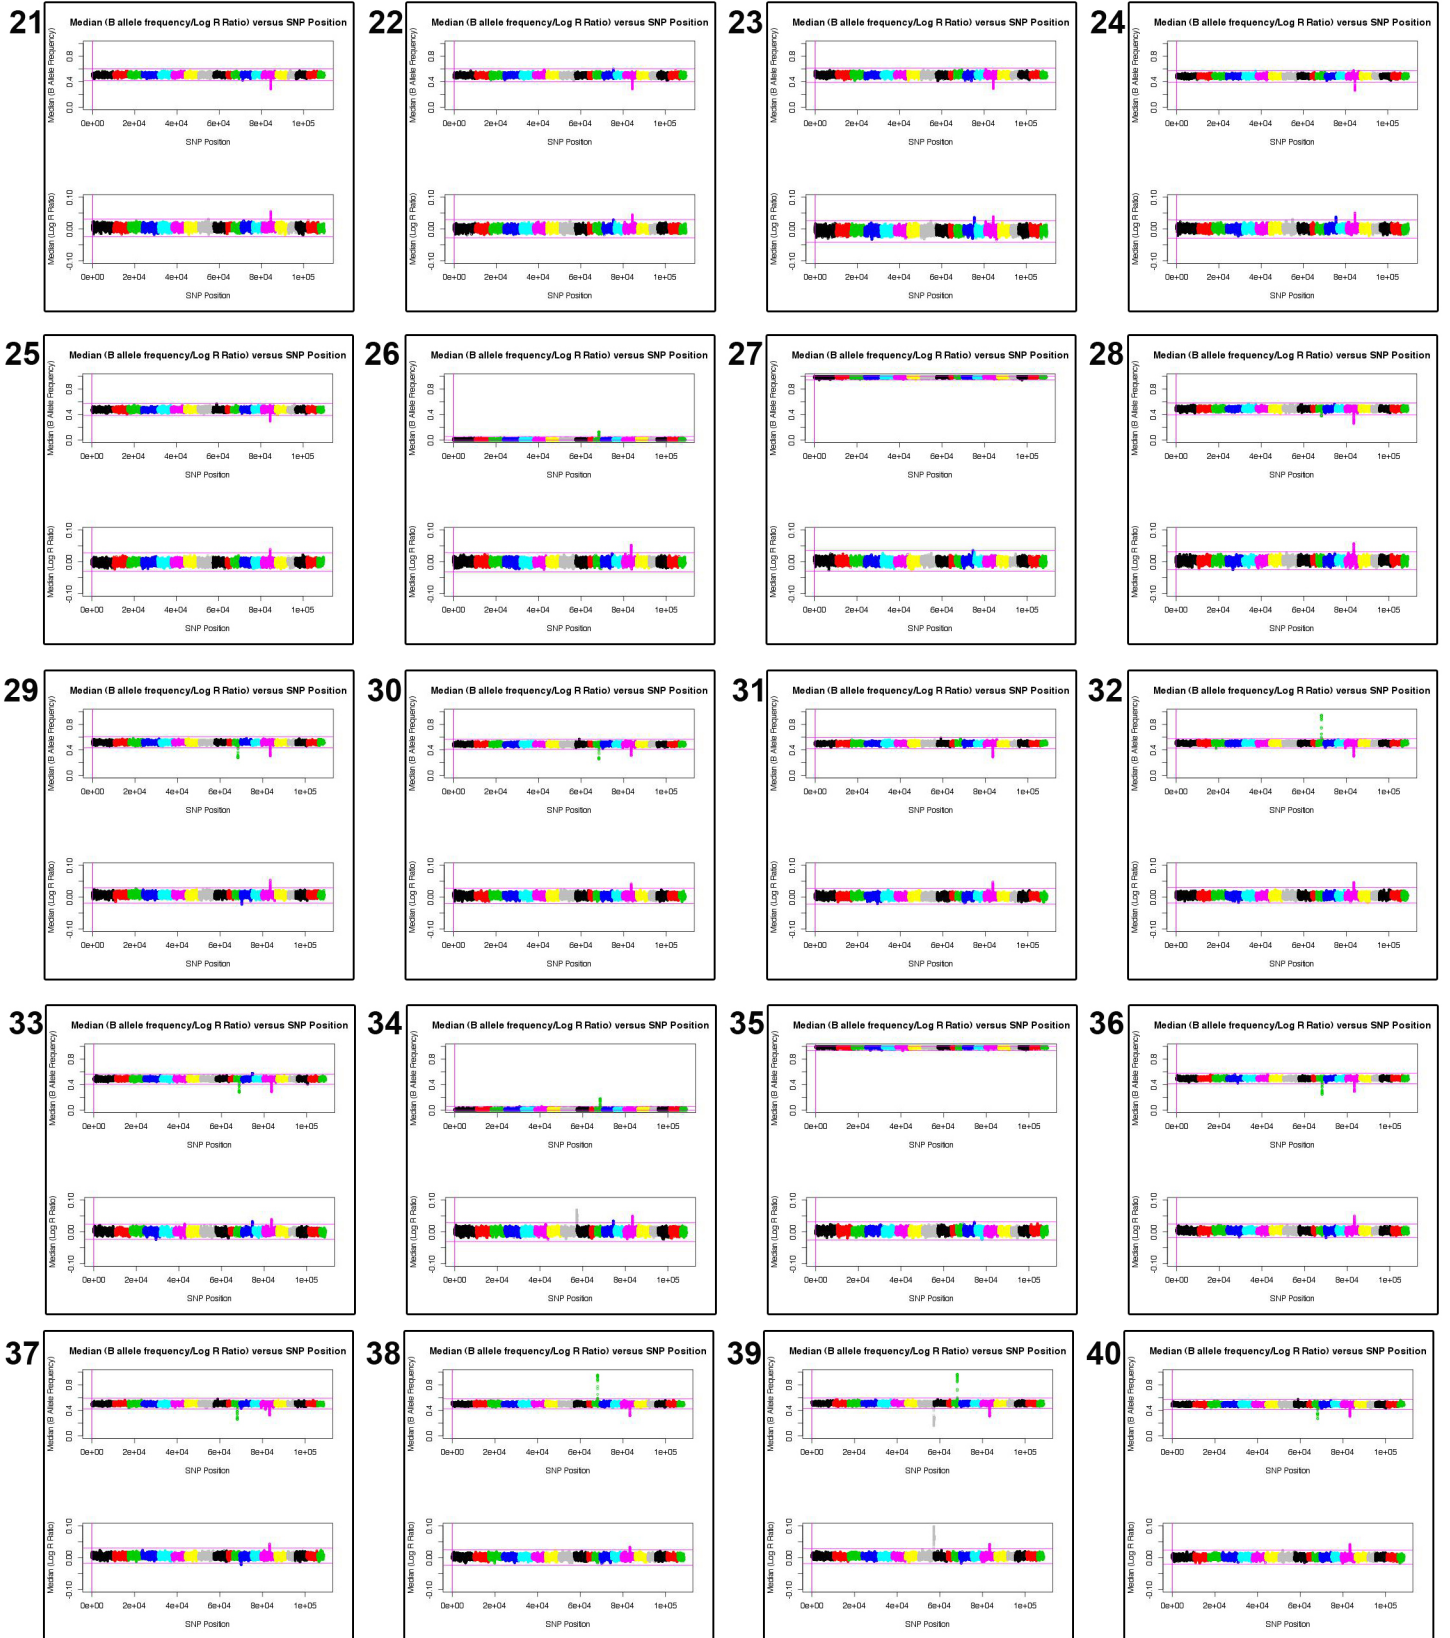

# Batch 2

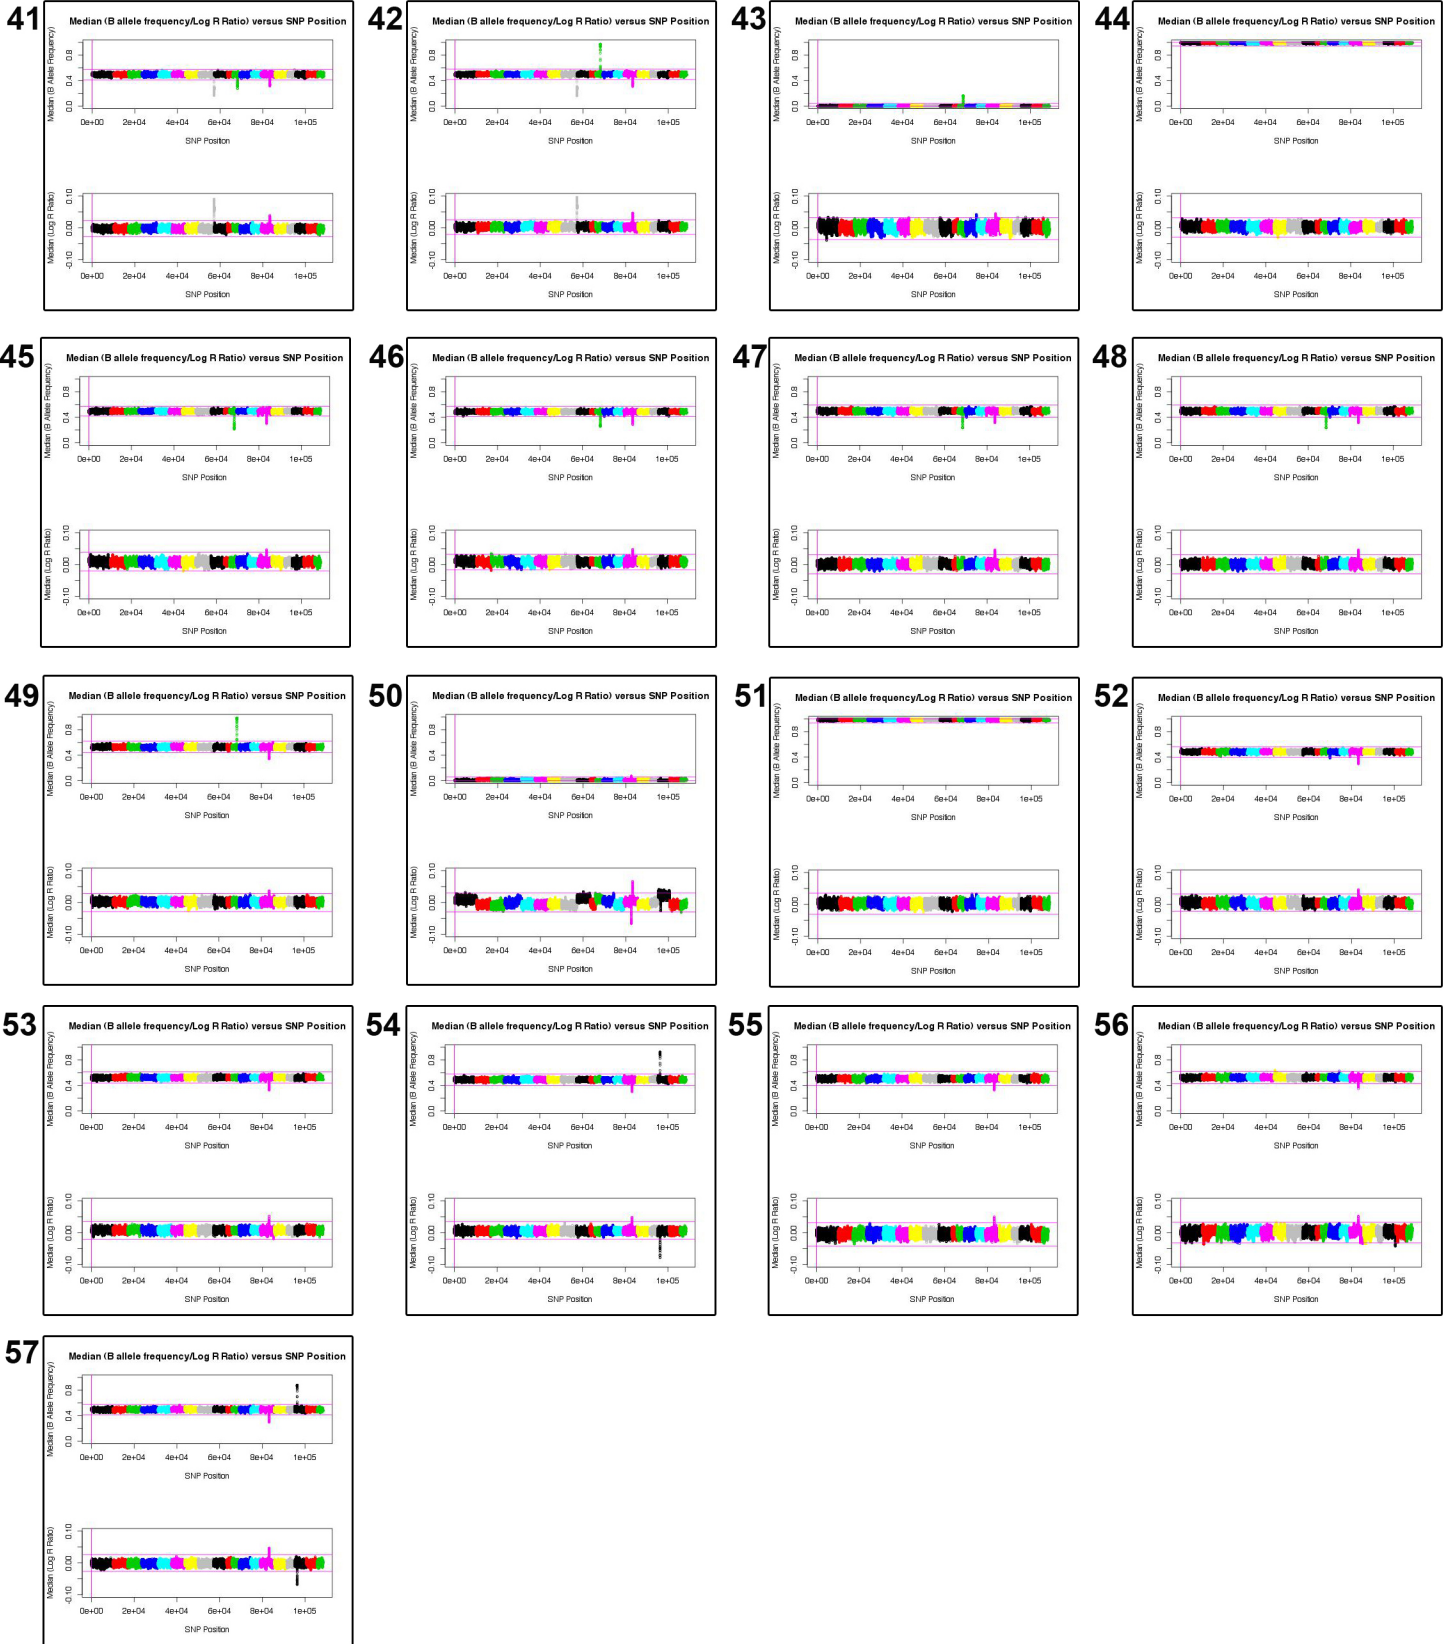

# Batch 3

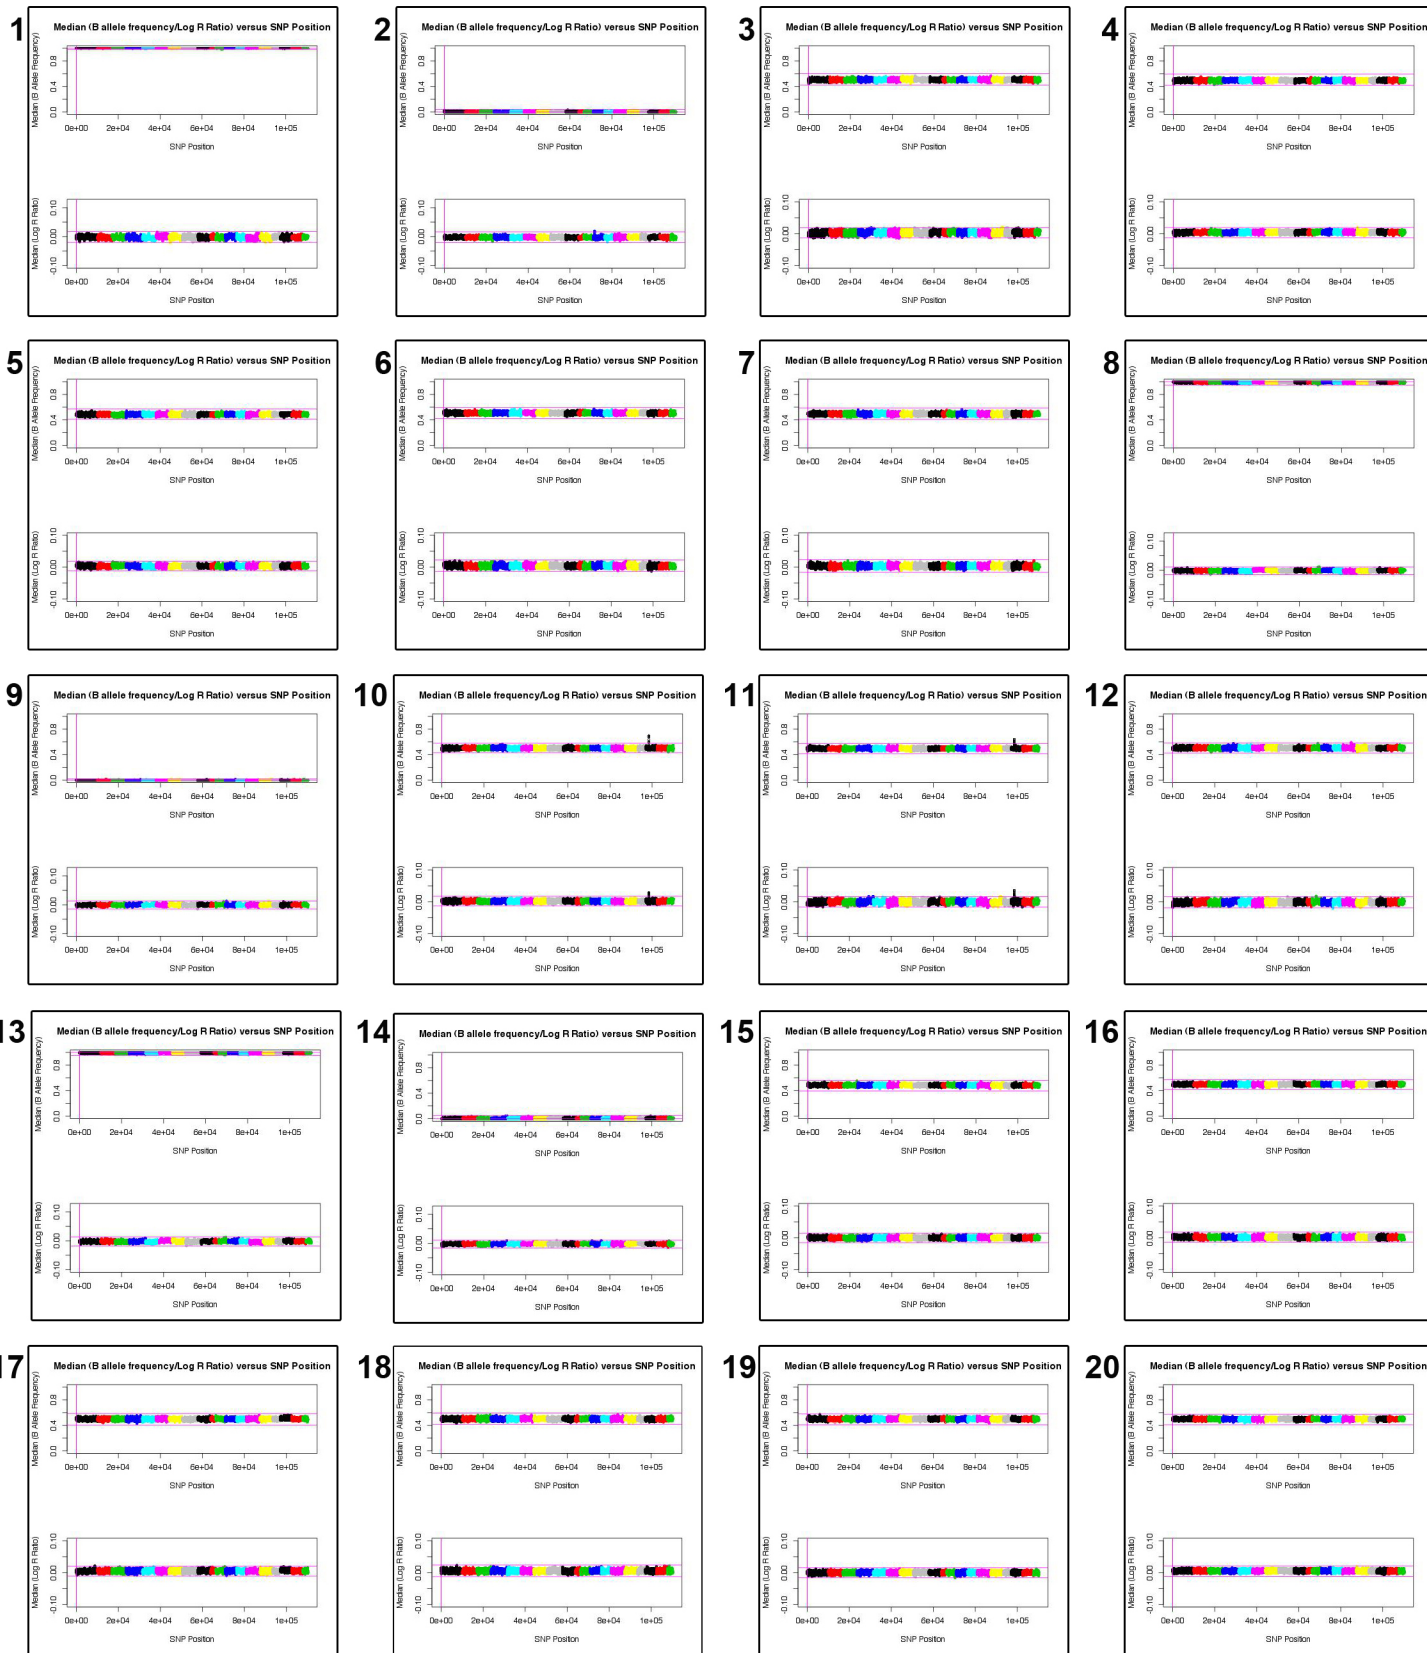

# Batch 3

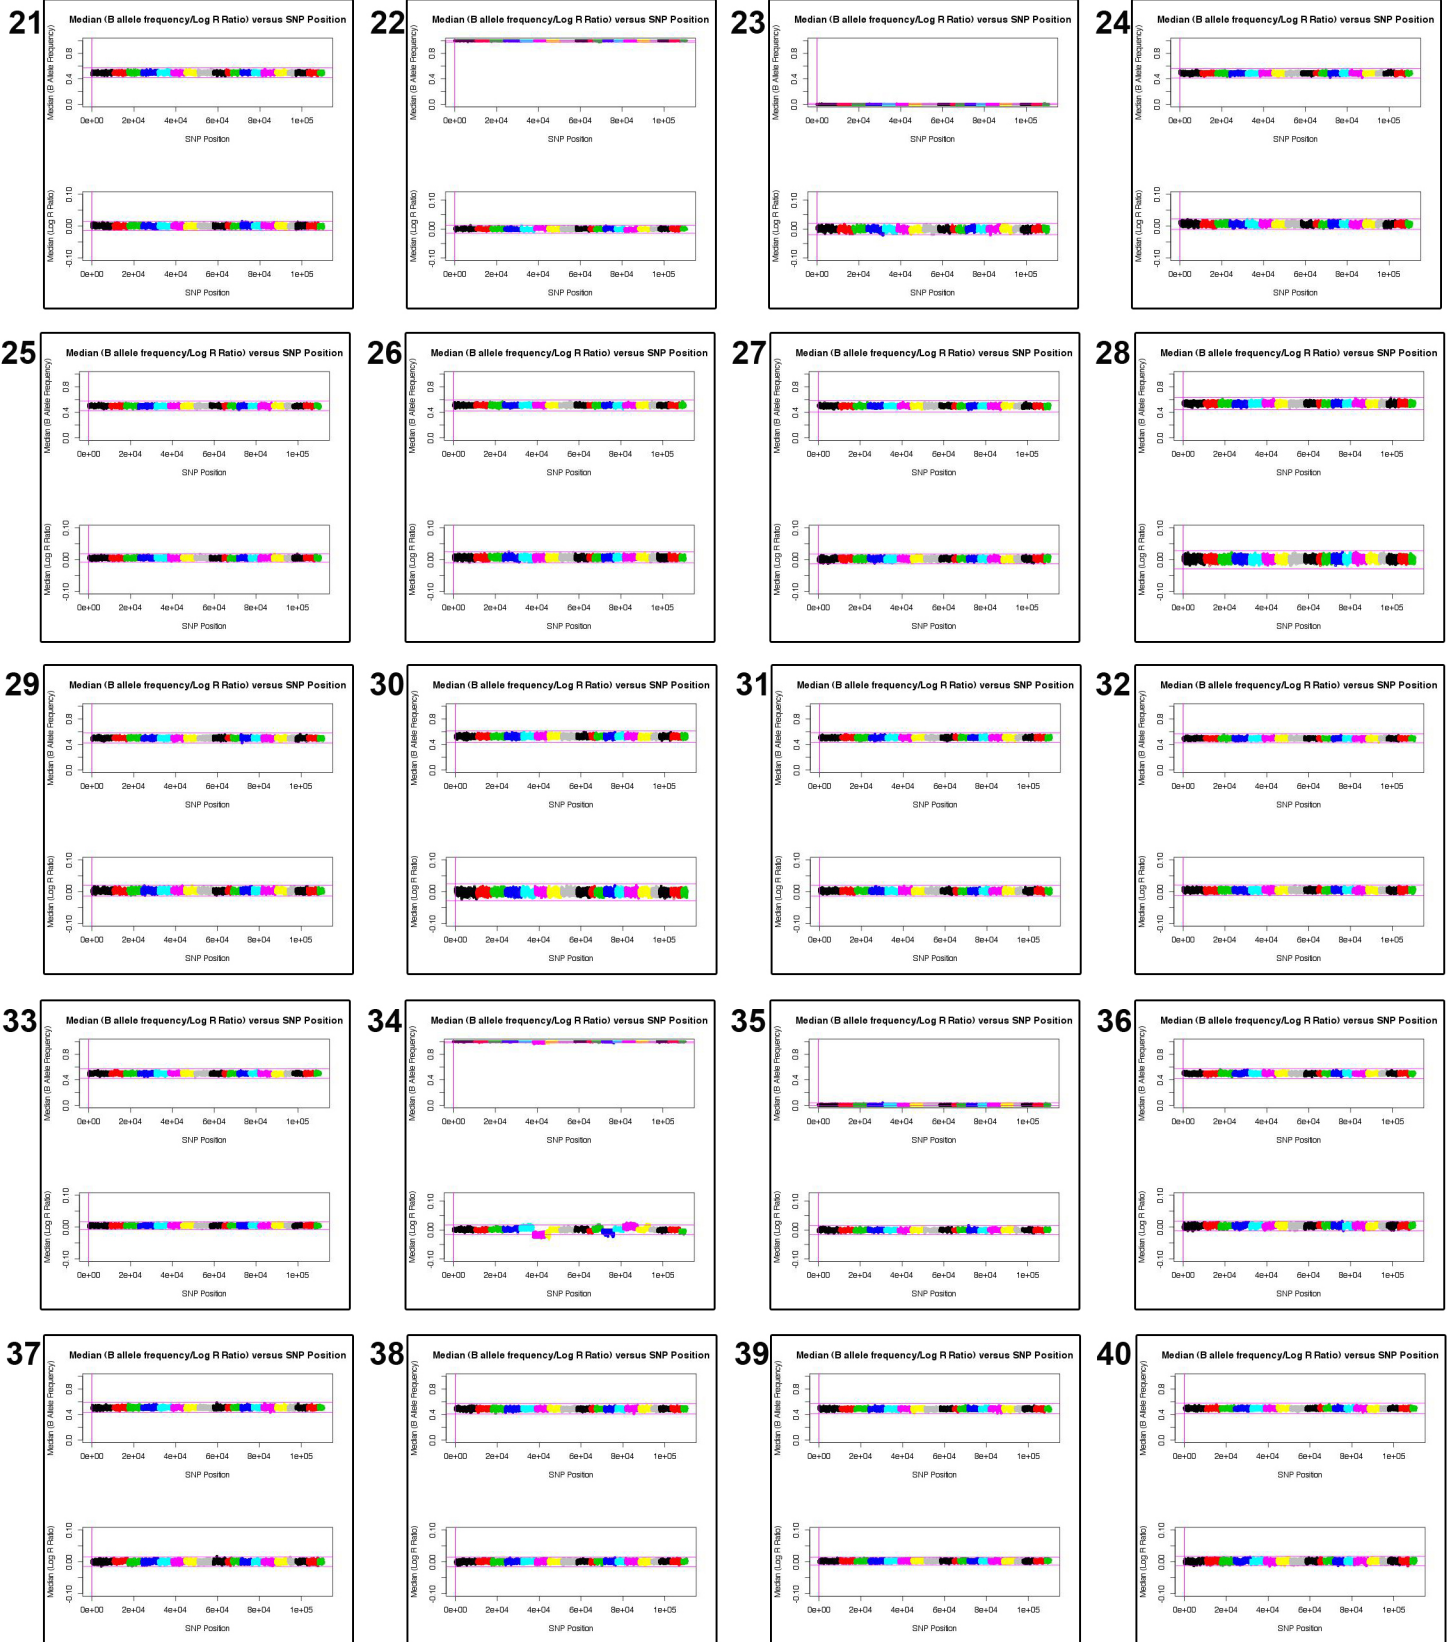

# Batch 3

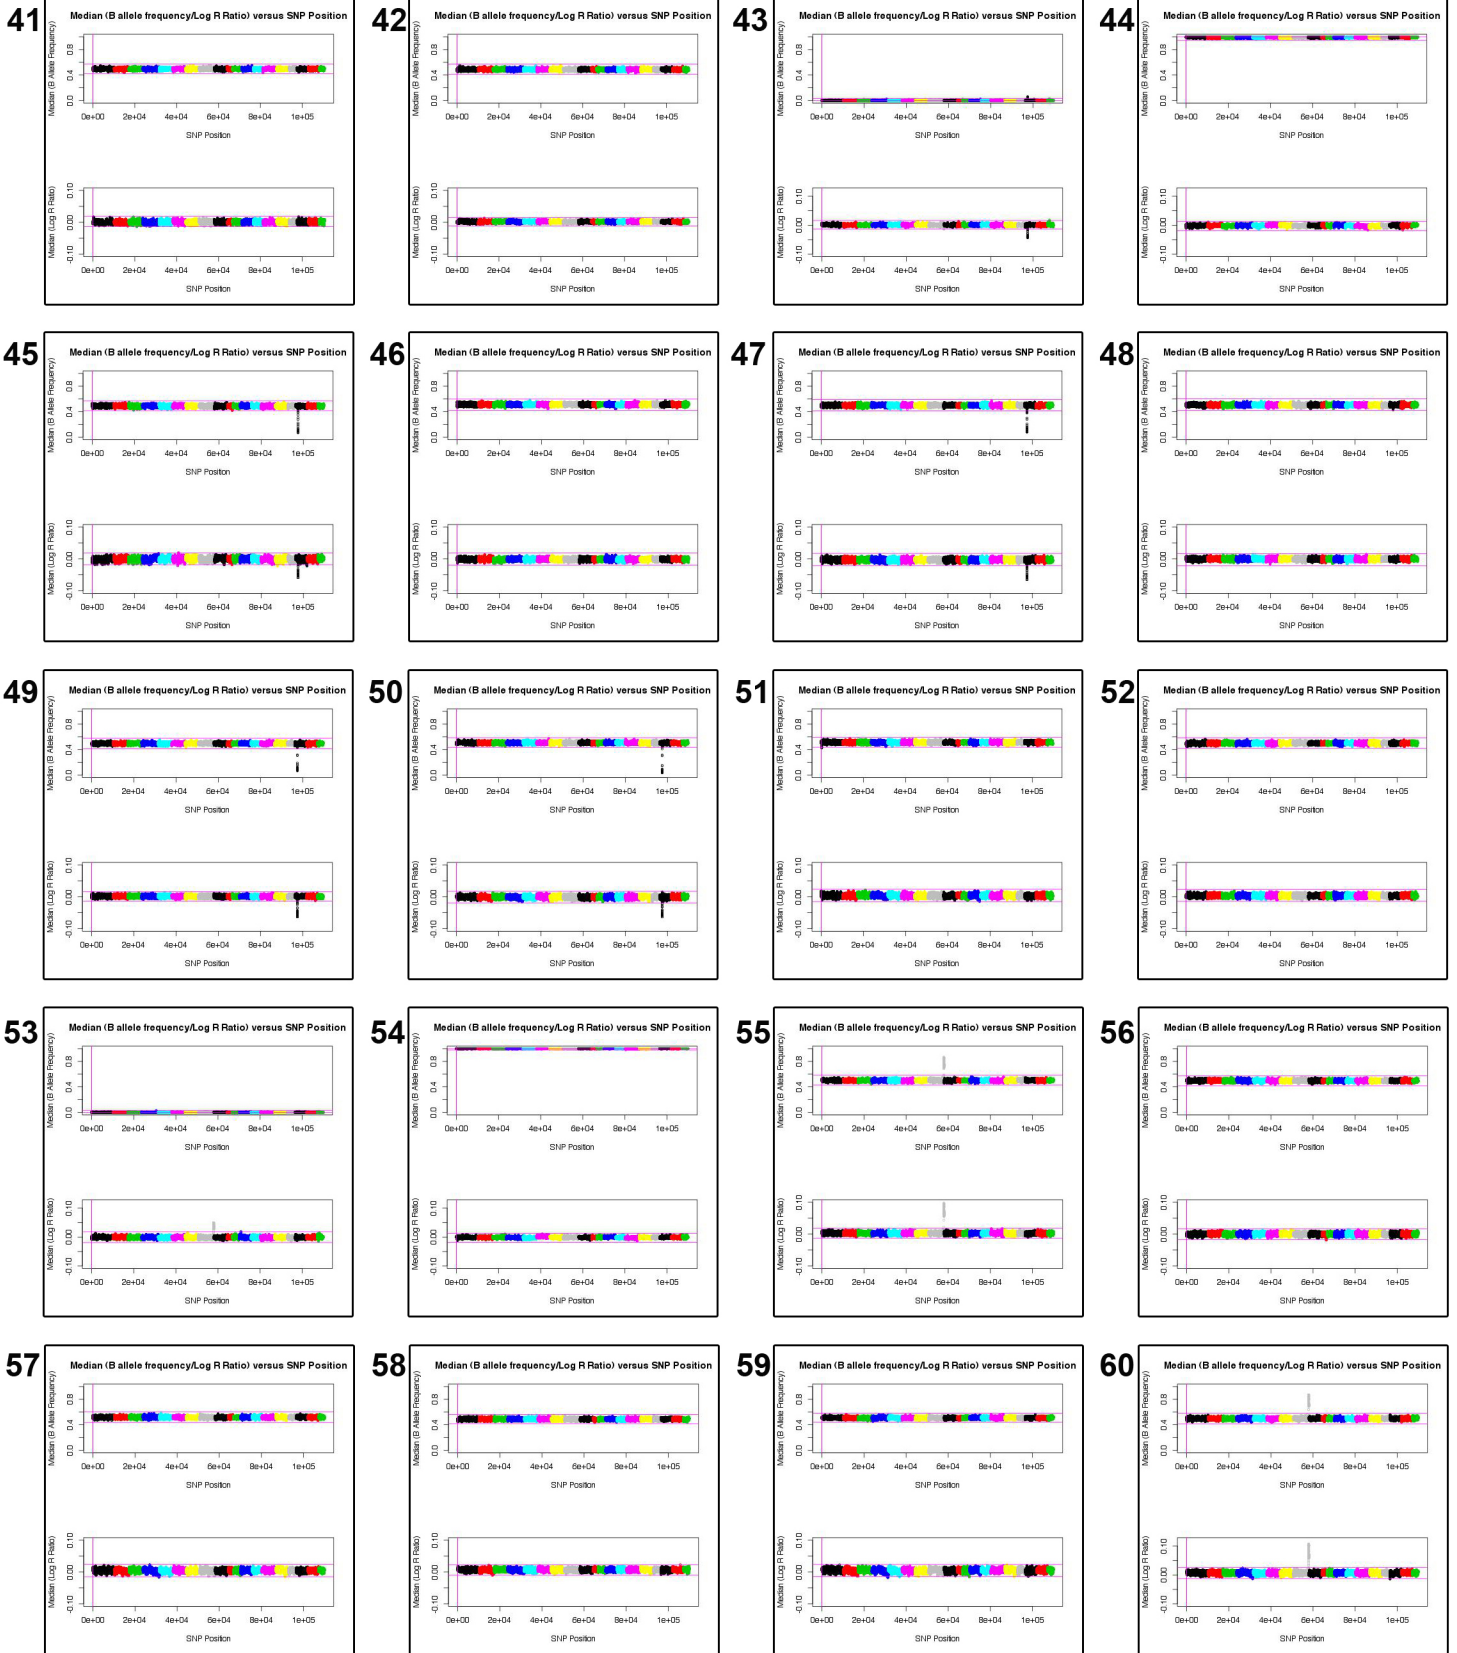

Supplement: pnas.1417322111.sd03.pdf [file pnas.1417322111.sd03.pdf]
