# Supplementary material
Source: PubMed Central journal article supplement (PMC4217424)
Supplement: pnas.1417322111.sd01.pdf [file pnas.1417322111.sd01.pdf]

KA II:1

| Type          | Chr  | Cytoband | Start       | Stop        | #Probes | Amplification/Deletion Score | pval      | Gene Names            |
|---------------|------|----------|-------------|-------------|---------|------------------------------|-----------|-----------------------|
| Deletion      | chr1 | p36.22   | 9,769,722   | 9,776,962   | 4       | -0.857395                    | 6.48E-13  | CLSTN1                |
| Amplification | chr1 | p36.13   | 17,080,364  | 17,148,651  | 13      | 0.974746                     | 1.72E-31  | CROCC                 |
| Amplification | chr1 | p34.3    | 37,692,387  | 37,696,262  | 3       | 1.152843                     | 2.88E-14  |                       |
| Amplification | chr1 | p22.3    | 86,852,848  | 86,857,814  | 3       | 1.354913                     | 2.18E-18  |                       |
| Deletion      | chr1 | p22.3    | 86,872,379  | 86,878,386  | 4       | -0.949745                    | 5.10E-13  | CLCA3P                |
| Deletion      | chr1 | p13.3    | 108,535,814 | 108,538,721 | 3       | -0.980607                    | 1.84E-11  | SLC25A24              |
| Amplification | chr1 | p13.3    | 110,033,018 | 110,039,447 | 3       | 2.851847                     | 2.58E-32  | GSTM1                 |
| Amplification | chr1 | q21.1    | 147,446,584 | 147,644,890 | 12      | 0.474119                     | 5.61E-11  | LOC388692, FCGR1C     |
| Amplification | chr1 | q21.3    | 151,028,700 | 151,036,494 | 4       | 0.855373                     | 9.19E-12  | LCE1D                 |
| Amplification | chr1 | q25.2    | 177,596,757 | 177,599,656 | 3       | 1.156067                     | 1.79E-13  |                       |
| Amplification | chr1 | q25.3    | 179,017,844 | 179,021,893 | 3       | 0.913388                     | 2.62E-10  | XPR1                  |
| Amplification | chr1 | q25.3    | 181,431,556 | 181,435,403 | 3       | 1.237696                     | 1.28E-14  | LAMC2                 |
| Deletion      | chr1 | q31.3    | 195,009,358 | 195,065,925 | 9       | -0.939988                    | 6.47E-22  | CFHR3, CFHR1          |
| Deletion      | chr1 | q31.3    | 196,572,806 | 196,576,263 | 3       | -1.046282                    | 6.76E-13  |                       |
| Amplification | chr1 | q41      | 219,120,336 | 219,123,019 | 3       | 0.933821                     | 4.00E-10  | HLX                   |
| Deletion      | chr2 | p25.3    | 197,916     | 206,851     | 6       | -0.902341                    | 1.13E-19  |                       |
| Amplification | chr2 | p22.3    | 34,551,222  | 34,590,056  | 18      | 3.569027                     | 9.06E-193 |                       |
| Deletion      | chr2 | p22.2    | 37,803,744  | 37,858,438  | 25      | -0.515604                    | 1.39E-23  |                       |
| Amplification | chr2 | p22.1    | 41,092,989  | 41,101,699  | 5       | 1.164281                     | 1.63E-18  |                       |
| Amplification | chr2 | p16.3    | 52,604,016  | 52,635,754  | 5       | 3.354053                     | 5.51E-67  |                       |
| Amplification | chr2 | p11.2    | 88,967,005  | 88,972,914  | 4       | 0.931283                     | 1.45E-13  |                       |
| Amplification | chr2 | q13      | 112,750,646 | 112,764,948 | 5       | 1.085985                     | 1.80E-14  | ZC3H6                 |
| Amplification | chr2 | q24.1    | 155,527,714 | 155,535,770 | 3       | 0.997467                     | 5.81E-12  |                       |
| Deletion      | chr2 | q31.2    | 180,121,271 | 180,129,739 | 6       | -0.973031                    | 4.28E-19  | ZNF385B               |
| Deletion      | chr3 | p22.2    | 37,954,819  | 37,961,169  | 6       | -0.720731                    | 8.07E-13  | CTDSPL                |
| Amplification | chr3 | p12.3    | 75,850,223  | 75,875,963  | 10      | 0.634342                     | 1.19E-13  | ZNF717                |
| Amplification | chr3 | q24      | 148,577,529 | 148,623,222 | 24      | 0.344413                     | 1.72E-11  | ZIC4, ZIC1            |
| Amplification | chr3 | q26.1    | 163,997,228 | 164,108,010 | 28      | 3.319299                     | 2.94E-282 |                       |
| Amplification | chr3 | q29      | 196,835,413 | 196,929,885 | 21      | 0.599503                     | 1.85E-27  | SDHAP2, MIR570        |
| Deletion      | chr3 | q29      | 196,943,380 | 196,952,558 | 5       | -0.81752                     | 2.80E-12  | MUC20                 |
| Deletion      | chr4 | p16.1    | 9,821,327   | 9,842,703   | 4       | -4.494194                    | 6.51E-48  |                       |
| Amplification | chr4 | p15.1    | 34,457,648  | 34,491,174  | 6       | 0.955737                     | 5.55E-20  |                       |
| Deletion      | chr4 | q13.2    | 69,069,651  | 69,165,872  | 14      | -3.88975                     | 1.48E-149 | UGT2B17               |
| Amplification | chr4 | q13.2    | 70,190,682  | 70,294,371  | 5       | 0.903128                     | 6.64E-13  | UGT2B28               |
| Deletion      | chr4 | q26      | 119,345,371 | 119,348,888 | 3       | -1.203823                    | 4.50E-13  | NDST3                 |
| Amplification | chr4 | q35.2    | 190,708,316 | 190,975,780 | 83      | 0.292446                     | 1.90E-18  |                       |
| Deletion      | chr5 | q13.3    | 75,647,535  | 75,696,084  | 19      | -0.455983                    | 6.71E-15  | SV2C                  |
| Amplification | chr5 | q31.2    | 137,836,466 | 137,842,166 | 3       | 0.947127                     | 5.90E-11  |                       |
| Amplification | chr6 | p25.3    | 236,535     | 326,382     | 48      | 0.491768                     | 8.22E-36  | DUSP22                |
| Amplification | chr6 | p21.33   | 29,962,849  | 30,010,293  | 15      | 0.938043                     | 3.24E-36  | HLA-H, HCG2P7, HCG4P6 |

|               |       |                 |             |             |     |           |           |                                                                                                         |
|---------------|-------|-----------------|-------------|-------------|-----|-----------|-----------|---------------------------------------------------------------------------------------------------------|
| Deletion      | chr6  | p21.33          | 31,387,708  | 31,418,065  | 6   | -0.939045 | 3.57E-20  |                                                                                                         |
| Deletion      | chr6  | p21.32          | 32,563,252  | 32,601,021  | 9   | -2.56787  | 4.49E-63  | HLA-DRB5                                                                                                |
| Deletion      | chr6  | p21.32          | 32,613,538  | 32,799,320  | 70  | -0.3842   | 1.74E-39  | HLA-DRB6, HLA-DRB1, HLA-DQA1, HLA-DQB1                                                                  |
| Deletion      | chr6  | p21.32          | 32,629,848  | 32,633,740  | 3   | -3.24443  | 6.21E-26  | HLA-DRB6                                                                                                |
| Amplification | chr6  | p12.1           | 54,037,199  | 54,042,793  | 3   | 3.512882  | 5.05E-35  | C6orf142                                                                                                |
| Amplification | chr6  | p12.1           | 55,934,816  | 55,946,682  | 4   | 1.15537   | 5.84E-20  |                                                                                                         |
| Amplification | chr6  | q14.1           | 79,024,557  | 79,091,909  | 13  | 0.975752  | 2.96E-43  |                                                                                                         |
| Amplification | chr6  | q23.2           | 132,749,309 | 132,752,540 | 3   | 0.977115  | 1.50E-11  | MOXD1                                                                                                   |
| Deletion      | chr6  | q23.2           | 134,631,701 | 134,635,838 | 4   | -0.985116 | 1.11E-13  | SGK1                                                                                                    |
| Amplification | chr6  | q25.2           | 155,160,734 | 155,163,954 | 3   | 0.997535  | 5.79E-12  | RBM16                                                                                                   |
| Amplification | chr7  | p15.2           | 27,102,021  | 27,260,366  | 114 | 0.269436  | 1.96E-22  | HOXA1, HOXA2, HOXA3, HOXA4, HOXA5, HOXA6, HOXA7, HOXA9, MIR196B, HOXA10, HOXA11, HOXA11AS, HOXA13, EVX1 |
| Deletion      | chr7  | p14.1           | 38,257,171  | 38,323,384  | 33  | -0.45398  | 9.28E-28  | TARP                                                                                                    |
| Amplification | chr7  | q11.22          | 70,071,668  | 70,129,931  | 12  | 0.656219  | 1.34E-16  |                                                                                                         |
| Deletion      | chr7  | q21.11          | 86,073,120  | 86,079,755  | 3   | -1.141754 | 1.56E-12  |                                                                                                         |
| Deletion      | chr7  | q22.2           | 104,979,296 | 104,982,805 | 3   | -1.133854 | 3.28E-11  | RINT1                                                                                                   |
| Amplification | chr7  | q31.1           | 109,230,336 | 109,240,269 | 5   | 0.913638  | 1.03E-13  |                                                                                                         |
| Deletion      | chr7  | q34             | 141,698,634 | 141,714,227 | 10  | -5.416792 | 9.46E-151 |                                                                                                         |
| Deletion      | chr7  | q34             | 142,156,165 | 142,167,957 | 6   | -2.617756 | 3.44E-67  | TRY6                                                                                                    |
| Amplification | chr7  | q35             | 143,056,351 | 143,097,065 | 8   | 0.562749  | 2.70E-10  | FAM115C, CTAGE6P                                                                                        |
| Deletion      | chr7  | q35             | 143,370,088 | 143,373,806 | 3   | -1.029263 | 2.44E-12  |                                                                                                         |
| Amplification | chr7  | q36.3           | 156,485,711 | 156,490,539 | 3   | 2.062356  | 1.57E-24  | MNX1                                                                                                    |
| Amplification | chr8  | p21.2           | 25,030,003  | 25,039,429  | 3   | 1.181869  | 7.16E-15  |                                                                                                         |
| Amplification | chr8  | p11.23 - p11.22 | 39,352,361  | 39,505,315  | 59  | 2.990799  | NA        | ADAM5P, ADAM3A                                                                                          |
| Amplification | chr8  | p11.23          | 39,392,694  | 39,401,700  | 4   | 1.4241    | 7.23E-15  |                                                                                                         |
| Amplification | chr8  | q11.22          | 51,193,977  | 51,200,350  | 4   | 0.988615  | 4.04E-15  | SNTG1                                                                                                   |
| Deletion      | chr8  | q22.2           | 99,761,772  | 99,775,516  | 7   | -0.610457 | 2.66E-10  | STK3                                                                                                    |
| Deletion      | chr8  | q22.3           | 102,054,655 | 102,062,053 | 4   | -0.97126  | 8.03E-13  |                                                                                                         |
| Amplification | chr9  | p24.1           | 6,692,831   | 6,698,349   | 3   | 1.315319  | 5.22E-15  |                                                                                                         |
| Deletion      | chr9  | p21.3           | 23,343,915  | 23,377,719  | 5   | -0.749504 | 6.12E-11  |                                                                                                         |
| Amplification | chr9  | p21.1           | 28,173,829  | 28,190,787  | 9   | 0.577611  | 6.25E-12  | LINGO2                                                                                                  |
| Deletion      | chr9  | q21.13          | 77,194,207  | 77,200,885  | 3   | -1.065383 | 3.66E-13  |                                                                                                         |
| Amplification | chr10 | p11.23          | 31,287,101  | 31,291,584  | 3   | 4.588174  | 1.32E-57  | ZNF438                                                                                                  |
| Amplification | chr10 | q11.23          | 52,218,804  | 52,238,160  | 8   | 0.668507  | 7.21E-14  | A1CF                                                                                                    |
| Amplification | chr10 | q22.3           | 77,926,390  | 77,928,797  | 3   | 1.668164  | 8.80E-12  | C10orf11                                                                                                |
| Deletion      | chr11 | p15.4           | 5,742,476   | 5,765,497   | 15  | -1.067818 | 1.89E-55  | OR52N5                                                                                                  |
| Deletion      | chr11 | p15.4           | 7,750,215   | 7,798,052   | 14  | -0.856582 | 3.06E-30  | OR5P2                                                                                                   |
| Amplification | chr11 | p15.1           | 18,906,505  | 18,917,242  | 6   | 0.800579  | 5.98E-14  | MRGPRX1                                                                                                 |
| Amplification | chr11 | q11             | 55,123,719  | 55,207,364  | 38  | 0.964514  | 2.61E-116 | OR4C11, OR4P4, OR4S2, OR4C6                                                                             |
| Amplification | chr11 | q22.1           | 98,271,459  | 98,311,618  | 19  | 1.003118  | 2.02E-58  |                                                                                                         |

|               |       |               |             |             |     |           |           |                                                                                                       |
|---------------|-------|---------------|-------------|-------------|-----|-----------|-----------|-------------------------------------------------------------------------------------------------------|
| Deletion      | chr12 | p13.33        | 738,240     | 743,282     | 4   | -1.07655  | 1.10E-14  | WNK1                                                                                                  |
| Amplification | chr12 | p13.31        | 9,528,590   | 9,610,113   | 16  | 0.578461  | 5.83E-19  |                                                                                                       |
| Amplification | chr12 | p13.2         | 11,116,883  | 11,140,477  | 8   | 0.831101  | 2.29E-18  | PRR4, PRH1, TAS2R43                                                                                   |
| Deletion      | chr12 | q12           | 41,307,749  | 41,312,537  | 3   | -0.967625 | 6.77E-11  |                                                                                                       |
| Deletion      | chr13 | q13.3         | 36,969,571  | 36,982,936  | 3   | -1.069042 | 5.91E-12  |                                                                                                       |
| Amplification | chr13 | q14.11        | 42,497,481  | 42,504,644  | 5   | 1.539459  | 9.34E-41  | DNAJC15                                                                                               |
| Amplification | chr14 | q11.1 - q11.2 | 18,864,561  | 19,494,475  | 53  | 0.349174  | 2.20E-23  | POTEM, OR4Q3, OR4M1, OR4N2, OR4K2, OR4K5, OR4K1                                                       |
| Deletion      | chr14 | q11.2         | 21,481,361  | 22,066,201  | 292 | -0.376579 | 6.94E-137 |                                                                                                       |
| Deletion      | chr14 | q12           | 23,740,511  | 23,744,018  | 3   | -1.084129 | 9.74E-13  |                                                                                                       |
| Deletion      | chr14 | q13.2         | 34,676,390  | 34,683,869  | 3   | -0.996559 | 3.33E-10  | KIAA0391                                                                                              |
| Amplification | chr14 | q23.3         | 64,804,409  | 64,811,203  | 5   | 0.749086  | 3.20E-11  |                                                                                                       |
| Deletion      | chr14 | q24.3         | 73,071,404  | 73,092,168  | 8   | -3.811657 | 3.07E-124 | HEATR4, ACOT1                                                                                         |
| Amplification | chr14 | q24.3         | 73,309,616  | 73,315,376  | 4   | 0.995651  | 4.41E-13  | C14orf43                                                                                              |
| Amplification | chr14 | q31.1         | 79,176,037  | 79,183,213  | 4   | 1.444178  | 6.69E-22  | NRXN3                                                                                                 |
| Amplification | chr14 | q32.2         | 98,799,004  | 98,810,201  | 9   | 0.628383  | 1.66E-11  | BCL11B                                                                                                |
| Amplification | chr14 | q32.33        | 104,686,613 | 104,708,328 | 10  | 0.864636  | 7.82E-23  | JAG2                                                                                                  |
| Amplification | chr14 | q32.33        | 105,403,001 | 105,425,486 | 8   | 4.260221  | 2.29E-134 |                                                                                                       |
| Amplification | chr14 | q32.33        | 105,428,694 | 105,474,067 | 11  | 0.756297  | 4.56E-19  | KIAA0125                                                                                              |
| Deletion      | chr14 | q32.33        | 105,602,602 | 105,632,227 | 12  | -4.127228 | 2.34E-123 |                                                                                                       |
| Amplification | chr14 | q32.33        | 105,788,623 | 105,795,857 | 5   | 1.074797  | 1.84E-21  |                                                                                                       |
| Amplification | chr14 | q32.33        | 105,856,591 | 105,881,952 | 7   | 1.630267  | 1.34E-57  |                                                                                                       |
| Deletion      | chr14 | q32.33        | 106,207,549 | 106,255,249 | 23  | -0.586008 | 2.34E-28  |                                                                                                       |
| Amplification | chr15 | q11.2         | 18,692,865  | 20,088,315  | 151 | 1.149393  | NA        | GOLGA6L6, GOLGA8C, BCL8, LOC646214, CXADRP2, POTE8, NF1P1, LOC727924, OR4M2, OR4N4, OR4N3P, LOC646396 |
| Deletion      | chr15 | q14           | 32,514,939  | 32,594,245  | 25  | -0.904251 | 5.07E-61  | GOLGA8A                                                                                               |
| Amplification | chr15 | q14           | 35,174,207  | 35,179,710  | 4   | 0.919843  | 3.41E-11  | MEIS2                                                                                                 |
| Amplification | chr15 | q24.3         | 74,671,626  | 74,680,498  | 4   | 4.02596   | 1.12E-67  | SCAPER                                                                                                |
| Amplification | chr15 | q25.2         | 81,095,411  | 81,259,359  | 75  | 1.02286   | 1.15E-243 | CPEB1, AP3B2, SCARNA15, FSD2                                                                          |
| Deletion      | chr15 | q26.3         | 98,232,932  | 98,243,645  | 5   | -0.896226 | 1.95E-15  |                                                                                                       |
| Deletion      | chr16 | p13.11        | 14,956,177  | 15,030,000  | 14  | -0.740924 | 8.67E-32  | PDXDC1                                                                                                |
| Amplification | chr16 | p11.2         | 28,511,295  | 28,529,999  | 6   | 1.342571  | 9.12E-33  | SULT1A2, SULT1A1                                                                                      |
| Amplification | chr16 | p11.2         | 32,379,126  | 33,348,570  | 22  | 0.505912  | 4.71E-17  | TP53TG3B, TP53TG3, SLC6A10P, LOC390705                                                                |
| Deletion      | chr16 | q12.2         | 54,353,978  | 54,379,898  | 10  | -0.657099 | 9.56E-18  | CES4                                                                                                  |
| Amplification | chr16 | q12.2         | 54,399,890  | 54,408,498  | 5   | 0.906564  | 2.33E-14  | CES1                                                                                                  |
| Amplification | chr16 | q23.1         | 75,097,331  | 75,100,924  | 3   | 3.228209  | 1.30E-25  | CNTNAP4                                                                                               |
| Amplification | chr17 | p13.3         | 1,906,319   | 1,906,436   | 3   | 2.269779  | 1.47E-36  | HIC1                                                                                                  |
| Amplification | chr17 | q12           | 32,826,928  | 32,832,701  | 4   | 0.779556  | 4.63E-10  | ACACA                                                                                                 |
| Amplification | chr17 | q21.2         | 36,675,987  | 36,684,678  | 6   | 3.766917  | 6.06E-90  |                                                                                                       |
| Deletion      | chr17 | q21.31        | 41,521,544  | 41,710,444  | 67  | -0.947144 | 5.50E-200 | KIAA1267                                                                                              |
| Deletion      | chr17 | q22           | 52,445,183  | 52,454,230  | 4   | -1.146562 | 3.75E-16  |                                                                                                       |

|               |       |               |            |            |     |           |           |                                  |
|---------------|-------|---------------|------------|------------|-----|-----------|-----------|----------------------------------|
| Amplification | chr18 | q21.1         | 42,794,580 | 42,822,884 | 8   | 0.673803  | 2.67E-12  | KATNAL2, TCEB3CL, TCEB3C, TCEB3B |
| Amplification | chr19 | p12           | 20,399,700 | 20,474,476 | 15  | 0.705522  | 1.32E-18  |                                  |
| Amplification | chr19 | q13.12        | 41,815,501 | 42,052,486 | 105 | 0.953837  | 2.00E-303 | ZNF461, ZNF567, ZNF790, ZNF345   |
| Amplification | chr19 | q13.42        | 59,249,279 | 59,251,879 | 3   | 0.994187  | 1.34E-10  | VSTM1                            |
| Deletion      | chr19 | q13.42        | 59,421,197 | 59,503,760 | 37  | -0.266222 | 2.01E-15  | LILRA6, LILRB5, LILRB2, LILRA3   |
| Deletion      | chr20 | p13           | 1,511,632  | 1,532,485  | 10  | -4.1031   | 1.80E-139 | SIRPB1                           |
| Deletion      | chr20 | p13           | 3,827,436  | 3,831,431  | 6   | -1.058697 | 9.25E-25  | PANK2                            |
| Amplification | chr21 | p11.2 - p11.1 | 9,882,922  | 10,022,365 | 10  | 1.098379  | 1.26E-41  | TPTE                             |
| Deletion      | chr21 | q21.1         | 22,577,751 | 22,585,099 | 3   | -1.015284 | 2.49E-12  |                                  |
| Deletion      | chr22 | q11.23        | 22,677,959 | 22,725,353 | 22  | -3.063248 | 1.52E-196 | LOC391322, GSTT1, GSTTP2         |
| Deletion      | chr22 | q11.23        | 22,714,979 | 22,720,254 | 4   | -4.992759 | 2.28E-10  | GSTTP2                           |
| Deletion      | chr22 | q13.1         | 37,689,058 | 37,715,431 | 16  | -0.747472 | 9.56E-36  | APOBEC3A, APOBEC3B               |
| Amplification | chr22 | q13.2         | 41,226,643 | 41,279,529 | 11  | 1.14849   | 4.11E-44  | SERHL, RRP7A                     |

KA II:2

| Type          | Chr  | Cytoband      | Start       | Stop        | #Probes | Amplification/Deletion Score | pval      | Gene Names            |
|---------------|------|---------------|-------------|-------------|---------|------------------------------|-----------|-----------------------|
| Amplification | chr1 | p34.3         | 34,876,833  | 34,883,434  | 4       | 1.247019                     | 2.71E-18  |                       |
| Deletion      | chr1 | p22.1         | 93,181,900  | 93,192,266  | 6       | -1.016536                    | 7.34E-19  | FAM69A                |
| Deletion      | chr1 | p13.3         | 110,034,542 | 110,041,771 | 3       | -1.670101                    | 1.35E-22  | GSTM1                 |
| Deletion      | chr1 | q21.1         | 147,308,557 | 147,460,720 | 27      | -0.553128                    | 1.82E-24  |                       |
| Amplification | chr1 | q21.3         | 150,823,073 | 150,851,498 | 11      | 0.872231                     | 1.17E-23  | LCE3C                 |
| Amplification | chr1 | q21.3         | 151,028,700 | 151,036,494 | 4       | 2.933737                     | 1.15E-50  | LCE1D                 |
| Amplification | chr1 | q31.1         | 187,972,203 | 188,041,994 | 12      | 0.975465                     | 2.11E-30  |                       |
| Deletion      | chr1 | q31.3         | 196,572,806 | 196,576,263 | 3       | -1.063249                    | 4.01E-11  |                       |
| Amplification | chr1 | q41           | 221,866,739 | 221,926,079 | 32      | 0.599636                     | 2.08E-32  | CAPN8                 |
| Amplification | chr1 | q42.13        | 227,879,152 | 227,882,854 | 4       | 4.215879                     | 1.33E-67  |                       |
| Deletion      | chr1 | q44           | 246,668,425 | 246,713,399 | 13      | -0.587614                    | 3.72E-14  | OR2T2, OR2T3          |
| Amplification | chr1 | q44           | 246,794,552 | 246,806,728 | 3       | 1.488677                     | 4.23E-13  | OR2T34                |
| Amplification | chr1 | q44           | 246,811,355 | 246,860,610 | 23      | 3.468864                     | 3.82E-293 | OR2T10, OR2T11        |
| Deletion      | chr2 | p25.3         | 3,713,664   | 3,714,291   | 3       | -2.450455                    | 5.72E-35  | ALLC                  |
| Amplification | chr2 | p22.3         | 34,551,222  | 34,590,056  | 18      | 0.958178                     | 2.56E-39  |                       |
| Deletion      | chr2 | p22.1         | 40,998,458  | 41,002,713  | 4       | -0.962409                    | 7.18E-12  |                       |
| Amplification | chr2 | p16.3         | 52,604,016  | 52,635,754  | 5       | 3.602167                     | 9.84E-67  |                       |
| Deletion      | chr2 | p12           | 77,464,059  | 77,468,426  | 4       | -0.917891                    | 4.12E-10  | LRRTM4                |
| Amplification | chr2 | p11.2         | 88,914,081  | 89,211,017  | 66      | 1.338525                     | 2.09E-244 |                       |
| Amplification | chr2 | p11.2         | 88,914,081  | 88,941,307  | 14      | 3.099022                     | 2.37E-52  |                       |
| Amplification | chr2 | p11.2         | 88,967,005  | 88,977,899  | 6       | 4.078027                     | 1.15E-39  |                       |
| Amplification | chr2 | p11.2         | 88,983,003  | 89,211,017  | 32      | 0.916905                     | 2.95E-16  |                       |
| Amplification | chr2 | p11.2         | 89,231,629  | 89,377,764  | 16      | 0.548637                     | 5.51E-14  |                       |
| Amplification | chr2 | q22.3         | 146,582,195 | 146,592,834 | 4       | 3.293793                     | 7.81E-53  |                       |
| Deletion      | chr3 | q13.31        | 116,140,997 | 116,147,005 | 4       | -1.086416                    | 9.28E-14  | ZBTB20                |
| Amplification | chr3 | q26.1         | 164,009,321 | 164,027,783 | 5       | 3.122922                     | 7.24E-50  |                       |
| Deletion      | chr3 | q29           | 194,358,882 | 194,367,009 | 6       | -2.992426                    | 1.60E-43  |                       |
| Amplification | chr3 | q29           | 196,835,413 | 196,942,211 | 23      | 0.921086                     | 7.33E-55  | SDHAP2, MIR570, MUC20 |
| Amplification | chr4 | p15.1         | 34,457,648  | 34,491,174  | 6       | 3.820446                     | 4.61E-92  |                       |
| Amplification | chr4 | q13.2         | 70,190,682  | 70,294,371  | 5       | 0.815605                     | 3.48E-10  | UGT2B28               |
| Amplification | chr4 | q35.2         | 190,730,982 | 190,928,028 | 65      | 0.329108                     | 3.65E-21  |                       |
| Amplification | chr5 | p15.33        | 776,194     | 830,000     | 6       | 0.809619                     | 3.94E-10  |                       |
| Amplification | chr5 | q21.2 - q21.3 | 104,461,541 | 104,528,503 | 12      | 1.062958                     | 5.85E-39  | RAB9BP1               |
| Deletion      | chr5 | q22.1         | 110,925,043 | 110,938,515 | 6       | -0.764073                    | 1.82E-10  |                       |
| Amplification | chr5 | q31.2         | 137,836,466 | 137,843,368 | 4       | 1.11684                      | 1.05E-12  |                       |
| Deletion      | chr5 | q33.1         | 150,185,190 | 150,202,660 | 7       | -0.826208                    | 9.87E-14  |                       |
| Deletion      | chr5 | q35.3         | 180,342,860 | 180,359,036 | 9       | -0.883322                    | 2.20E-19  | BTNL3                 |
| Deletion      | chr6 | p25.3         | 202,063     | 326,382     | 61      | -0.342105                    | 1.96E-21  | DUSP22                |
| Amplification | chr6 | p25.3         | 1,326,887   | 1,334,137   | 4       | 0.986428                     | 8.53E-11  |                       |
| Deletion      | chr6 | p21.33        | 29,962,849  | 30,005,390  | 14      | -0.846307                    | 2.62E-27  | HLA-H, HCG2P7, HCG4P6 |

|               |       |                 |             |             |    |           |           |                                                                                                                        |
|---------------|-------|-----------------|-------------|-------------|----|-----------|-----------|------------------------------------------------------------------------------------------------------------------------|
| Amplification | chr6  | p21.32          | 32,558,677  | 32,601,021  | 10 | 2.775842  | 2.36E-83  | HLA-DRB5                                                                                                               |
| Amplification | chr6  | p12.1           | 54,037,199  | 54,042,793  | 3  | 4.422278  | 4.03E-52  | C6orf142                                                                                                               |
| Amplification | chr6  | p12.1           | 55,934,816  | 55,950,557  | 5  | 1.013068  | 7.19E-14  |                                                                                                                        |
| Amplification | chr6  | q12             | 67,068,673  | 67,101,414  | 5  | 1.02185   | 3.59E-16  |                                                                                                                        |
| Amplification | chr6  | q16.3           | 103,845,083 | 103,860,632 | 3  | 1.123629  | 3.21E-12  |                                                                                                                        |
| Amplification | chr6  | q22.33          | 128,014,072 | 128,130,943 | 50 | 0.530616  | 2.81E-40  | THEMIS                                                                                                                 |
| Deletion      | chr6  | q23.2           | 134,633,117 | 134,635,838 | 3  | -1.053913 | 2.12E-10  | SGK1                                                                                                                   |
| Deletion      | chr6  | q26             | 162,003,132 | 162,013,151 | 7  | -0.89044  | 4.46E-17  | PARK2                                                                                                                  |
| Amplification | chr6  | q27             | 165,645,537 | 165,650,669 | 4  | 3.666914  | 8.97E-62  |                                                                                                                        |
| Deletion      | chr7  | p22.3           | 246,786     | 254,401     | 5  | -0.977284 | 1.05E-13  |                                                                                                                        |
| Amplification | chr7  | p15.2           | 27,142,474  | 27,204,396  | 62 | 0.311496  | 4.44E-18  | HOXA5, HOXA6, HOXA7, HOXA9,<br>MIR196B, HOXA10, HOXA11,<br>HOXA11AS, HOXA13                                            |
| Amplification | chr7  | q11.21          | 64,357,426  | 64,370,651  | 6  | 1.015206  | 2.27E-16  |                                                                                                                        |
| Amplification | chr7  | q21.13          | 90,037,060  | 90,058,536  | 7  | 0.769594  | 3.28E-13  |                                                                                                                        |
| Amplification | chr7  | q31.33          | 125,833,251 | 125,837,583 | 3  | 3.331647  | 5.69E-29  |                                                                                                                        |
| Deletion      | chr7  | q34             | 141,698,634 | 141,714,227 | 10 | -3.53041  | 2.76E-92  |                                                                                                                        |
| Deletion      | chr7  | q34             | 142,156,165 | 142,166,758 | 4  | -1.040668 | 2.06E-13  | TRY6                                                                                                                   |
| Amplification | chr7  | q36.3           | 156,485,711 | 156,495,956 | 6  | 1.25141   | 5.90E-22  | MXN1                                                                                                                   |
| Amplification | chr8  | p11.23 - p11.22 | 39,352,361  | 39,505,315  | 59 | 0.829375  | 4.92E-109 | ADAM5P, ADAM3A                                                                                                         |
| Amplification | chr8  | q11.21          | 49,145,822  | 49,187,195  | 9  | 0.686989  | 1.72E-13  |                                                                                                                        |
| Deletion      | chr8  | q13.3           | 72,445,046  | 72,452,984  | 3  | -1.445312 | 8.49E-12  |                                                                                                                        |
| Deletion      | chr9  | p21.3           | 23,353,267  | 23,365,985  | 3  | -4.817848 | 1.31E-38  |                                                                                                                        |
| Amplification | chr10 | p11.23          | 31,287,101  | 31,291,584  | 3  | 1.00178   | 4.57E-10  | ZNF438                                                                                                                 |
| Amplification | chr10 | q11.22          | 46,384,985  | 47,021,474  | 74 | 0.412292  | 5.10E-36  | SYT15, GPRIN2, PPYR1, LOC643650,<br>LOC728643, ANXA8, ANXA8L1,<br>FAM25G, FAM25C, FAM25B,<br>AGAP9, LOC642826, FAM35B2 |
| Amplification | chr10 | q11.23          | 52,873,705  | 52,881,742  | 6  | 0.972236  | 2.07E-17  | PRKG1                                                                                                                  |
| Amplification | chr10 | q21.3           | 70,952,973  | 70,960,246  | 4  | 1.081597  | 1.76E-14  |                                                                                                                        |
| Amplification | chr11 | p15.4           | 4,926,583   | 4,932,273   | 5  | 1.073932  | 1.14E-17  |                                                                                                                        |
| Deletion      | chr11 | p15.4           | 5,742,476   | 5,765,497   | 15 | -0.925835 | 4.51E-36  | ORS2N5                                                                                                                 |
| Deletion      | chr11 | p15.4           | 7,762,277   | 7,783,551   | 9  | -0.916063 | 1.06E-20  | ORSP2                                                                                                                  |
| Amplification | chr12 | p13.31          | 9,528,590   | 9,554,208   | 5  | 2.174443  | 2.26E-34  |                                                                                                                        |
| Amplification | chr12 | p13.31          | 9,555,181   | 9,610,113   | 11 | 0.616679  | 2.28E-11  |                                                                                                                        |
| Amplification | chr12 | p13.2           | 11,109,483  | 11,140,477  | 11 | 1.023834  | 3.99E-29  | PRR4, PRH1, TAS2R43                                                                                                    |
| Amplification | chr12 | q23.1           | 98,318,378  | 98,320,224  | 3  | 1.273719  | 1.97E-14  | ANKS1B                                                                                                                 |
| Deletion      | chr13 | q13.2           | 33,030,946  | 33,042,616  | 4  | -0.956822 | 1.32E-11  |                                                                                                                        |
| Deletion      | chr13 | q21.1           | 56,658,479  | 56,686,922  | 15 | -0.972241 | 2.51E-41  |                                                                                                                        |
| Amplification | chr14 | q11.1           | 18,505,611  | 18,537,236  | 4  | 1.030359  | 2.67E-13  |                                                                                                                        |
| Deletion      | chr14 | q13.2           | 34,676,390  | 34,683,869  | 3  | -4.358104 | 1.50E-41  | KIAA0391                                                                                                               |
| Deletion      | chr14 | q21.1           | 40,680,589  | 40,722,419  | 7  | -1.028182 | 7.42E-21  |                                                                                                                        |
| Deletion      | chr14 | q24.3           | 73,072,457  | 73,092,168  | 7  | -2.090338 | 2.22E-48  | HEATR4, ACOT1                                                                                                          |
| Amplification | chr14 | q24.3           | 73,309,616  | 73,315,376  | 4  | 0.938215  | 8.74E-11  | C14orf43                                                                                                               |
| Amplification | chr14 | q31.1           | 79,176,037  | 79,183,213  | 4  | 1.228105  | 1.71E-13  | NRXN3                                                                                                                  |

|               |       |               |             |             |     |           |           |                                                                                                       |
|---------------|-------|---------------|-------------|-------------|-----|-----------|-----------|-------------------------------------------------------------------------------------------------------|
| Amplification | chr14 | q32.2         | 98,799,004  | 98,812,371  | 10  | 0.689762  | 3.86E-13  | BCL11B                                                                                                |
| Amplification | chr14 | q32.33        | 105,314,254 | 105,425,486 | 40  | 2.415933  | NA        |                                                                                                       |
| Amplification | chr14 | q32.33        | 105,343,150 | 105,354,945 | 7   | 3.914423  | 3.42E-18  |                                                                                                       |
| Amplification | chr14 | q32.33        | 105,397,801 | 105,401,460 | 3   | 0.345677  | 4.74E-37  |                                                                                                       |
| Amplification | chr14 | q32.33        | 105,403,001 | 105,416,455 | 7   | 4.199664  | 5.64E-22  |                                                                                                       |
| Amplification | chr14 | q32.33        | 105,428,694 | 105,761,975 | 66  | 0.705804  | 2.78E-83  | KIAA0125, ADAM6                                                                                       |
| Amplification | chr14 | q32.33        | 106,219,784 | 106,253,703 | 16  | 0.524385  | 6.54E-14  |                                                                                                       |
| Amplification | chr15 | q11.2         | 18,741,716  | 20,079,994  | 149 | 0.960861  | NA        | GOLGA6L6, GOLGA8C, BCL8, LOC646214, CXADRP2, POTEB, NF1P1, LOC727924, OR4M2, OR4N4, OR4N3P, LOC646396 |
| Amplification | chr15 | q11.2         | 18,842,565  | 18,848,268  | 4   | 2.068898  | 2.08E-14  |                                                                                                       |
| Deletion      | chr15 | q14           | 32,517,839  | 32,594,245  | 24  | -0.934881 | 1.45E-53  |                                                                                                       |
| Amplification | chr15 | q24.3         | 74,671,626  | 74,680,498  | 4   | 2.699997  | 4.93E-40  | SCAPER                                                                                                |
| Deletion      | chr15 | q26.3         | 98,234,519  | 98,239,513  | 3   | -3.957735 | 8.44E-47  |                                                                                                       |
| Amplification | chr16 | p13.3         | 2,638,581   | 2,687,893   | 14  | 0.604562  | 5.76E-14  | KCTD5                                                                                                 |
| Amplification | chr16 | p11.2         | 28,511,295  | 28,529,999  | 6   | 0.822555  | 1.38E-11  | SULT1A2, SULT1A1                                                                                      |
| Deletion      | chr16 | p11.2         | 32,513,457  | 33,842,184  | 48  | -0.285593 | 1.57E-12  | TP53TG3B, TP53TG3, SLC6A10P, LOC390705                                                                |
| Deletion      | chr16 | p11.2 - p11.1 | 34,325,501  | 34,584,850  | 49  | -0.422005 | 2.62E-25  | LOC283914, LOC146481                                                                                  |
| Amplification | chr16 | q22.1         | 68,710,277  | 68,753,268  | 10  | 0.801882  | 1.04E-17  | PDPR                                                                                                  |
| Deletion      | chr16 | q22.3         | 70,641,420  | 70,665,497  | 8   | -0.755388 | 4.27E-15  | HP, HPR                                                                                               |
| Amplification | chr17 | p13.3         | 1,906,319   | 1,906,436   | 3   | 1.819063  | 8.45E-26  | HIC1                                                                                                  |
| Amplification | chr17 | q12           | 31,461,588  | 31,503,833  | 19  | 0.979564  | 2.14E-51  |                                                                                                       |
| Deletion      | chr17 | q21.31        | 41,519,702  | 41,710,444  | 68  | -0.961828 | 1.77E-171 | KIAA1267                                                                                              |
| Deletion      | chr17 | q23.1         | 55,328,074  | 55,332,880  | 3   | -1.20918  | 1.73E-11  | RPS6KB1                                                                                               |
| Amplification | chr19 | p13.3         | 1,200,840   | 1,205,738   | 5   | 0.97475   | 4.63E-13  | MIDN                                                                                                  |
| Deletion      | chr19 | q13.42        | 59,421,197  | 59,434,253  | 10  | -0.507313 | 1.15E-10  | LILRA6                                                                                                |
| Deletion      | chr20 | p13           | 1,511,632   | 1,531,221   | 9   | -2.83277  | 8.01E-65  | SIRPB1                                                                                                |
| Deletion      | chr20 | q13.12        | 45,214,159  | 45,220,263  | 4   | -0.885373 | 2.06E-10  | EYA2                                                                                                  |
| Amplification | chr20 | q13.2         | 52,081,719  | 52,090,452  | 5   | 1.036702  | 2.03E-14  | BCAS1                                                                                                 |
| Amplification | chr20 | q13.33        | 59,002,447  | 59,023,312  | 9   | 0.798046  | 3.20E-14  |                                                                                                       |
| Amplification | chr21 | p11.2 - p11.1 | 9,882,922   | 10,022,365  | 10  | 0.677068  | 2.03E-14  | TPTE                                                                                                  |
| Amplification | chr22 | q11.22        | 20,717,815  | 21,368,161  | 284 | 0.80776   | 2.11E-99  | VPREB1, LOC96610, ZNF280B, ZNF280A, PRAME, LOC648691, POM121L1P, GGTL2                                |
| Amplification | chr22 | q11.22        | 20,717,815  | 21,576,911  | 410 | 1.170204  | NA        | VPREB1, LOC96610, ZNF280B, ZNF280A, PRAME, LOC648691, POM121L1P, GGTL2, MIR650, IGLL5                 |
| Amplification | chr22 | q11.22        | 21,371,845  | 21,576,911  | 125 | 2.592837  | NA        | MIR650, IGLL5                                                                                         |
| Amplification | chr22 | q11.22        | 21,405,998  | 21,423,633  | 7   | 1.646531  | 5.39E-15  |                                                                                                       |
| Amplification | chr22 | q11.22        | 21,539,942  | 21,556,810  | 12  | 3.425396  | 1.47E-11  |                                                                                                       |
| Amplification | chr22 | q11.22        | 21,558,810  | 21,568,919  | 5   | 4.326415  | 4.39E-15  | IGLL5                                                                                                 |
| Deletion      | chr22 | q11.23        | 22,677,959  | 22,725,353  | 22  | -0.900088 | 1.11E-49  | LOC391322, GSTT1, GSTTP2                                                                              |
| Deletion      | chr22 | q13.1         | 37,689,058  | 37,715,431  | 16  | -0.795941 | 2.82E-32  | APOBEC3A, APOBEC3B                                                                                    |
| Amplification | chr22 | q13.2         | 41,226,643  | 41,279,529  | 11  | 0.843196  | 2.17E-20  | SERHL, RRP7A                                                                                          |

KA III:2

| Type          | Chr  | Cytoband | Start       | Stop        | #Probes | Amplification/Deletion Score | pval      | Gene Names |
|---------------|------|----------|-------------|-------------|---------|------------------------------|-----------|------------|
| Amplification | chr1 | p34.3    | 37,692,387  | 37,696,262  | 3       | 1.030303                     | 1.79E-14  |            |
| Deletion      | chr1 | p34.2    | 42,501,361  | 42,507,619  | 3       | -0.929516                    | 1.83E-11  | FOXJ3      |
| Amplification | chr1 | p22.3    | 86,852,848  | 86,857,814  | 3       | 1.354339                     | 3.47E-20  |            |
| Deletion      | chr1 | p22.1    | 93,181,900  | 93,192,266  | 6       | -1.049677                    | 3.34E-28  | FAM69A     |
| Deletion      | chr1 | p13.3    | 108,535,814 | 108,538,721 | 3       | -0.893901                    | 6.56E-12  | SLC25A24   |
| Deletion      | chr1 | q21.1    | 147,308,557 | 147,510,591 | 35      | -0.472427                    | 3.10E-35  |            |
| Amplification | chr1 | q21.3    | 150,823,073 | 150,851,498 | 11      | 2.345197                     | 3.00E-84  | LCE3C      |
| Amplification | chr1 | q21.3    | 151,028,700 | 151,036,494 | 4       | 0.855613                     | 4.40E-13  | LCE1D      |
| Amplification | chr1 | q25.2    | 177,596,757 | 177,599,656 | 3       | 0.95148                      | 1.05E-11  |            |
| Amplification | chr1 | q25.3    | 179,017,844 | 179,021,893 | 3       | 0.985903                     | 3.19E-13  | XPR1       |
| Deletion      | chr1 | q31.3    | 196,572,806 | 196,576,263 | 3       | -6.187562                    | 1.89E-58  |            |
| Deletion      | chr1 | q32.1    | 203,353,451 | 203,357,949 | 3       | -1.359165                    | 3.55E-19  | RBBP5      |
| Amplification | chr1 | q41      | 221,868,204 | 221,923,683 | 30      | 0.591765                     | 1.49E-48  | CAPN8      |
| Deletion      | chr2 | p25.3    | 3,713,664   | 3,714,291   | 3       | -0.886608                    | 2.68E-13  | ALLC       |
| Deletion      | chr2 | p23.3    | 24,455,322  | 24,462,690  | 4       | -1.048988                    | 1.92E-18  |            |
| Amplification | chr2 | p22.3    | 34,551,222  | 34,590,056  | 18      | 3.783215                     | 6.37E-211 |            |
| Amplification | chr2 | p22.1    | 41,091,579  | 41,101,699  | 6       | 0.851586                     | 4.10E-16  |            |
| Amplification | chr2 | p11.2    | 88,967,005  | 88,977,899  | 6       | 0.839899                     | 1.16E-17  |            |
| Amplification | chr2 | q21.1    | 129,941,356 | 129,964,178 | 3       | 0.992974                     | 2.79E-10  |            |
| Amplification | chr2 | q22.3    | 146,582,195 | 146,592,834 | 4       | 1.193527                     | 6.25E-23  |            |
| Amplification | chr2 | q24.1    | 155,527,714 | 155,535,770 | 3       | 1.11954                      | 4.12E-15  |            |
| Deletion      | chr2 | q34      | 212,715,648 | 212,718,582 | 3       | -1.018551                    | 1.97E-13  | ERBB4      |
| Deletion      | chr3 | p22.2    | 37,954,819  | 37,961,169  | 6       | -0.972429                    | 1.95E-24  | CTDSPL     |
| Deletion      | chr3 | p21.31   | 47,209,546  | 47,232,081  | 7       | -0.722102                    | 4.64E-16  | FLJ39534   |
| Amplification | chr3 | p12.3    | 75,845,446  | 75,875,963  | 11      | 0.545667                     | 7.18E-14  | ZNF717     |
| Deletion      | chr3 | q24      | 147,399,301 | 147,404,757 | 3       | -1.299742                    | 2.10E-18  | PLSCR4     |
| Amplification | chr3 | q26.1    | 163,997,228 | 164,108,010 | 28      | 2.938318                     | 1.89E-273 |            |
| Amplification | chr3 | q26.1    | 164,054,607 | 164,063,685 | 4       | 1.468329                     | 1.54E-12  |            |
| Amplification | chr3 | q29      | 196,904,349 | 196,924,121 | 14      | 0.615846                     | 6.71E-27  | MIR570     |
| Amplification | chr4 | p15.1    | 34,457,648  | 34,491,174  | 6       | 0.977985                     | 1.19E-21  |            |
| Deletion      | chr4 | q13.2    | 69,069,651  | 69,165,872  | 14      | -3.228303                    | 6.08E-138 | UGT2B17    |
| Amplification | chr4 | q13.2    | 70,190,682  | 70,294,371  | 5       | 0.800553                     | 5.70E-13  | UGT2B28    |
| Deletion      | chr4 | q31.3    | 152,278,869 | 152,286,839 | 4       | -0.747981                    | 1.81E-10  | SH3D19     |
| Amplification | chr4 | q32.1    | 161,268,543 | 161,288,761 | 3       | 1.130103                     | 1.24E-11  |            |
| Amplification | chr4 | q35.2    | 190,730,982 | 190,928,028 | 65      | 0.315                        | 4.48E-29  |            |
| Deletion      | chr5 | q13.3    | 75,647,535  | 75,696,084  | 19      | -0.539679                    | 2.27E-26  | SV2C       |
| Deletion      | chr5 | q22.1    | 110,933,923 | 110,938,515 | 3       | -0.991817                    | 5.90E-12  |            |
| Amplification | chr5 | q31.2    | 137,836,466 | 137,842,166 | 3       | 0.999562                     | 2.08E-14  |            |
| Deletion      | chr5 | q35.3    | 180,342,860 | 180,359,036 | 9       | -0.825991                    | 9.36E-26  | BTNL3      |
| Amplification | chr6 | p25.3    | 241,674     | 326,382     | 45      | 0.453042                     | 4.06E-45  | DUSP22     |



|               |       |                 |             |             |    |           |           |                                                                                                                                                                                                           |
|---------------|-------|-----------------|-------------|-------------|----|-----------|-----------|-----------------------------------------------------------------------------------------------------------------------------------------------------------------------------------------------------------|
| Amplification | chr6  | p22.1           | 26,849,722  | 26,861,243  | 4  | 0.82103   | 2.76E-13  |                                                                                                                                                                                                           |
| Deletion      | chr6  | p21.33          | 31,387,708  | 31,418,065  | 6  | -1.066752 | 9.14E-27  |                                                                                                                                                                                                           |
| Deletion      | chr6  | p21.32          | 32,563,252  | 32,601,021  | 9  | -2.002811 | 2.48E-47  | HLA-DRB5                                                                                                                                                                                                  |
| Deletion      | chr6  | p21.32          | 32,629,848  | 32,633,740  | 3  | -2.181255 | 8.24E-25  | HLA-DRB6                                                                                                                                                                                                  |
| Deletion      | chr6  | p21.32          | 32,659,328  | 32,689,834  | 13 | -0.408691 | 2.09E-11  | HLA-DRB1                                                                                                                                                                                                  |
| Deletion      | chr6  | p21.32          | 32,716,255  | 32,739,859  | 14 | -0.886443 | 6.10E-34  | HLA-DQA1, HLA-DQB1                                                                                                                                                                                        |
| Amplification | chr6  | p12.1           | 54,037,199  | 54,042,793  | 3  | 4.509624  | 5.73E-53  | C6orf142                                                                                                                                                                                                  |
| Amplification | chr6  | p12.1           | 55,934,816  | 55,950,557  | 5  | 1.069781  | 4.14E-20  |                                                                                                                                                                                                           |
| Amplification | chr6  | q14.1           | 79,024,557  | 79,091,909  | 13 | 0.909036  | 3.70E-42  |                                                                                                                                                                                                           |
| Amplification | chr6  | q16.3           | 103,845,083 | 103,868,213 | 4  | 1.102411  | 6.50E-16  |                                                                                                                                                                                                           |
| Amplification | chr6  | q23.2           | 132,749,309 | 132,752,540 | 3  | 0.918105  | 5.41E-12  | MOXD1                                                                                                                                                                                                     |
| Deletion      | chr6  | q23.2           | 134,631,701 | 134,635,838 | 4  | -4.650465 | 7.09E-65  | SGK1                                                                                                                                                                                                      |
| Amplification | chr6  | q25.2           | 155,160,734 | 155,163,954 | 3  | 0.888924  | 3.68E-12  | RBM16                                                                                                                                                                                                     |
| Amplification | chr6  | q27             | 165,645,537 | 165,650,669 | 4  | 3.458999  | 1.47E-51  |                                                                                                                                                                                                           |
| Deletion      | chr7  | p14.1           | 38,258,332  | 38,337,971  | 40 | -0.403848 | 1.34E-32  | TARP                                                                                                                                                                                                      |
| Deletion      | chr7  | q21.11          | 86,073,120  | 86,079,755  | 3  | -0.97004  | 1.70E-11  |                                                                                                                                                                                                           |
| Deletion      | chr7  | q21.2           | 91,809,959  | 91,814,370  | 3  | -1.455605 | 8.37E-19  | ANKIB1                                                                                                                                                                                                    |
| Amplification | chr7  | q31.1           | 109,230,336 | 109,240,269 | 5  | 0.897333  | 3.07E-16  |                                                                                                                                                                                                           |
| Deletion      | chr7  | q31.33          | 125,833,251 | 125,837,583 | 3  | -3.924584 | 3.77E-36  |                                                                                                                                                                                                           |
| Deletion      | chr7  | q34             | 141,698,634 | 141,714,227 | 10 | -4.597646 | 7.39E-153 |                                                                                                                                                                                                           |
| Deletion      | chr7  | q34             | 142,159,173 | 142,167,957 | 5  | -2.075245 | 1.32E-49  | TRY6                                                                                                                                                                                                      |
| Deletion      | chr7  | q35             | 143,370,088 | 143,376,678 | 4  | -0.847665 | 6.26E-13  |                                                                                                                                                                                                           |
| Deletion      | chr7  | q36.1           | 151,724,590 | 151,747,964 | 13 | -0.545055 | 1.07E-18  | MLL3                                                                                                                                                                                                      |
| Amplification | chr7  | q36.3           | 156,485,711 | 156,490,539 | 3  | 1.943822  | 2.02E-26  | MNX1                                                                                                                                                                                                      |
| Deletion      | chr8  | p23.1           | 7,260,442   | 7,790,993   | 7  | -0.62078  | 5.84E-15  | DEFB103A, DEFB103B, SPAG11B, DEFB104A, DEFB104B, DEFB106A, DEFB106B, DEFB105A, DEFB105B, DEFB107A, DEFB107B, FAM90A7, FAM90A14, FAM90A13, FAM90A19, FAM90A18, FAM90A8, FAM90A9, FAM90A10, SPAG11A, DEFB4A |
| Deletion      | chr8  | p22             | 13,416,688  | 13,419,909  | 3  | -1.086484 | 3.29E-15  | DLC1                                                                                                                                                                                                      |
| Amplification | chr8  | p21.2           | 25,030,003  | 25,039,429  | 3  | 1.009689  | 2.86E-13  |                                                                                                                                                                                                           |
| Deletion      | chr8  | p12             | 32,797,545  | 32,808,108  | 4  | -2.694178 | 4.39E-19  |                                                                                                                                                                                                           |
| Amplification | chr8  | p11.23 - p11.22 | 39,352,361  | 39,505,315  | 59 | 3.583104  | NA        | ADAM5P, ADAM3A                                                                                                                                                                                            |
| Amplification | chr8  | q11.21          | 49,128,427  | 49,187,195  | 16 | 0.531283  | 9.03E-21  | UBE2V2                                                                                                                                                                                                    |
| Amplification | chr8  | q11.22          | 51,193,977  | 51,198,522  | 3  | 0.906877  | 1.52E-12  | SNTG1                                                                                                                                                                                                     |
| Deletion      | chr8  | q22.3           | 102,054,655 | 102,062,053 | 4  | -1.033252 | 7.02E-17  |                                                                                                                                                                                                           |
| Amplification | chr9  | p24.1           | 6,692,831   | 6,698,349   | 3  | 1.130136  | 3.24E-13  |                                                                                                                                                                                                           |
| Deletion      | chr9  | p21.3           | 23,353,267  | 23,365,985  | 3  | -1.080609 | 6.95E-16  |                                                                                                                                                                                                           |
| Amplification | chr10 | p11.23          | 31,287,101  | 31,291,584  | 3  | 4.783966  | 1.64E-58  | ZNF438                                                                                                                                                                                                    |
| Deletion      | chr11 | p15.4           | 5,742,476   | 5,765,497   | 15 | -5.29798  | 2.69E-245 | OR52N5                                                                                                                                                                                                    |
| Deletion      | chr11 | p15.1           | 18,687,987  | 18,691,662  | 3  | -0.816975 | 6.35E-11  | IGSF22                                                                                                                                                                                                    |

|               |       |               |             |             |     |           |            |                                                                                                      |
|---------------|-------|---------------|-------------|-------------|-----|-----------|------------|------------------------------------------------------------------------------------------------------|
| Amplification | chr11 | q22.1         | 98,272,173  | 98,311,618  | 18  | 1.070974  | 6.05E-69   |                                                                                                      |
| Deletion      | chr12 | p13.33        | 738,240     | 743,282     | 4   | -1.128271 | 1.54E-17   | WNK1                                                                                                 |
| Amplification | chr12 | p13.31        | 9,528,590   | 9,610,113   | 16  | 0.57221   | 1.07E-22   |                                                                                                      |
| Amplification | chr12 | p13.2         | 11,121,204  | 11,140,477  | 7   | 0.942204  | 6.64E-23   | PRR4, PRH1, TAS2R43                                                                                  |
| Deletion      | chr12 | q12           | 41,307,749  | 41,312,537  | 3   | -0.893646 | 5.36E-11   |                                                                                                      |
| Amplification | chr13 | q14.11        | 42,497,481  | 42,504,644  | 5   | 1.717563  | 1.33E-48   | DNAJC15                                                                                              |
| Amplification | chr14 | q11.1 - q11.2 | 18,505,611  | 19,494,475  | 59  | 0.426084  | 1.20E-50   | POTEG, POTE, OR4Q3, OR4M1, OR4N2, OR4K2, OR4K5, OR4K1                                                |
| Deletion      | chr14 | q11.2         | 21,479,168  | 22,089,626  | 305 | -0.373676 | 8.67E-183  |                                                                                                      |
| Deletion      | chr14 | q13.2         | 34,676,390  | 34,683,869  | 3   | -1.08817  | 8.53E-12   | KIAA0391                                                                                             |
| Deletion      | chr14 | q21.1         | 40,680,589  | 40,722,419  | 7   | -0.907437 | 3.76E-21   |                                                                                                      |
| Deletion      | chr14 | q24.3         | 73,072,457  | 73,092,168  | 7   | -3.809692 | 2.33E-111  | HEATR4, ACOT1                                                                                        |
| Amplification | chr14 | q24.3         | 73,309,616  | 73,315,376  | 4   | 0.960747  | 1.99E-13   | C14orf43                                                                                             |
| Amplification | chr14 | q31.1         | 79,176,037  | 79,183,213  | 4   | 1.110657  | 1.04E-15   | NRXN3                                                                                                |
| Amplification | chr14 | q32.33        | 105,403,001 | 105,425,486 | 8   | 4.071673  | 2.75E-132  |                                                                                                      |
| Amplification | chr14 | q32.33        | 105,428,694 | 105,474,067 | 11  | 0.691869  | 2.82E-20   | KIAA0125                                                                                             |
| Amplification | chr14 | q32.33        | 105,788,623 | 105,795,857 | 5   | 0.65517   | 5.42E-12   |                                                                                                      |
| Amplification | chr14 | q32.33        | 105,856,591 | 105,875,983 | 5   | 1.04424   | 7.16E-23   |                                                                                                      |
| Amplification | chr15 | q11.2         | 18,741,716  | 20,088,315  | 150 | 0.643979  | 6.22E-276  | GOLGA6L6, GOLGA8C, BCL8, LOC646214, CXADRP2, POTE, NF1P1, LOC727924, OR4M2, OR4N4, OR4N3P, LOC646396 |
| Amplification | chr15 | q11.2         | 19,537,035  | 20,014,154  | 48  | 0.924462  | 2.34E-17   | LOC727924, OR4M2, OR4N4, OR4N3P                                                                      |
| Deletion      | chr15 | q14           | 32,514,939  | 32,594,245  | 25  | -0.832589 | 1.75E-62   | GOLGA8A                                                                                              |
| Amplification | chr15 | q24.3         | 74,671,626  | 74,680,498  | 4   | 3.562541  | 2.10E-62   | SCAPER                                                                                               |
| Amplification | chr15 | q25.2         | 81,095,411  | 81,253,557  | 74  | 0.911299  | 8.85E-227  | CPEB1, AP3B2, SCARNA15, FSD2                                                                         |
| Deletion      | chr15 | q26.3         | 98,234,519  | 98,243,645  | 4   | -1.016201 | 1.97E-17   |                                                                                                      |
| Amplification | chr16 | p13.3         | 2,638,581   | 2,687,893   | 14  | 0.566359  | 1.84E-22   | KCTD5                                                                                                |
| Deletion      | chr16 | p13.11        | 14,956,177  | 15,030,000  | 14  | -0.738227 | 5.01E-35   | PDXDC1                                                                                               |
| Amplification | chr16 | p11.2         | 28,511,295  | 28,529,999  | 6   | 1.028918  | 3.39E-26   | SULT1A2, SULT1A1                                                                                     |
| Amplification | chr16 | p11.2         | 32,379,126  | 33,320,588  | 21  | 0.468123  | 3.39E-23   | TP53TG3B, TP53TG3, SLC6A10P, LOC390705                                                               |
| Deletion      | chr16 | q12.2         | 54,353,978  | 54,379,898  | 10  | -0.625131 | 2.11E-20   | CES4                                                                                                 |
| Amplification | chr16 | q12.2         | 54,399,890  | 54,408,498  | 5   | 0.775621  | 1.48E-13   | CES1                                                                                                 |
| Deletion      | chr16 | q22.3         | 70,641,420  | 70,665,497  | 8   | -0.970331 | 1.37E-29   | HP, HPR                                                                                              |
| Amplification | chr17 | p13.3         | 1,906,319   | 1,906,436   | 3   | 2.121045  | 3.40E-35   | HIC1                                                                                                 |
| Amplification | chr17 | q12           | 31,461,588  | 31,503,833  | 19  | 0.823865  | 9.95E-57   |                                                                                                      |
| Amplification | chr17 | q21.2         | 36,675,987  | 36,684,678  | 6   | 2.384704  | 8.35E-45   |                                                                                                      |
| Deletion      | chr17 | q21.31        | 41,521,544  | 41,710,444  | 67  | -0.967714 | 5.17E-262  | KIAA1267                                                                                             |
| Deletion      | chr17 | q23.1         | 55,328,074  | 55,332,880  | 3   | -1.061982 | 1.49E-11   | RPS6KB1                                                                                              |
| Amplification | chr19 | q13.12        | 41,815,501  | 42,053,699  | 106 | 0.87955   | 8.774e-310 | ZNF461, ZNF567, ZNF790, ZNF345                                                                       |
| Amplification | chr19 | q13.33        | 56,828,073  | 56,840,401  | 7   | 3.616304  | 2.40E-74   | SIGLEC14                                                                                             |
| Amplification | chr19 | q13.42        | 59,249,279  | 59,251,879  | 3   | 0.870182  | 4.91E-11   | VSTM1                                                                                                |

|               |       |               |            |            |    |           |           |                    |
|---------------|-------|---------------|------------|------------|----|-----------|-----------|--------------------|
| Deletion      | chr19 | q13.42        | 59,421,197 | 59,434,253 | 10 | -0.610207 | 1.50E-18  | LILRA6             |
| Deletion      | chr20 | p13           | 1,511,632  | 1,532,485  | 10 | -3.690909 | 3.29E-123 | SIRPB1             |
| Deletion      | chr20 | q13.12        | 45,214,159 | 45,220,263 | 4  | -0.930136 | 1.51E-16  | EYA2               |
| Amplification | chr20 | q13.2         | 52,081,719 | 52,090,452 | 5  | 0.918672  | 4.20E-15  | BCAS1              |
| Amplification | chr20 | q13.33        | 59,002,447 | 59,023,312 | 9  | 0.686329  | 3.92E-16  |                    |
| Amplification | chr21 | p11.2 - p11.1 | 9,882,922  | 10,022,365 | 10 | 1.014315  | 7.43E-45  | TPTE               |
| Deletion      | chr21 | q21.1         | 22,577,751 | 22,585,099 | 3  | -0.861627 | 1.37E-11  |                    |
| Deletion      | chr22 | q13.1         | 37,689,058 | 37,715,431 | 16 | -3.594415 | 1.16E-200 | APOBEC3A, APOBEC3B |
| Deletion      | chr22 | q13.1         | 37,694,756 | 37,707,008 | 7  | -5.544997 | 6.54E-17  |                    |
| Amplification | chr22 | q13.2         | 41,226,643 | 41,279,529 | 11 | 0.643476  | 1.45E-21  | SERHL, RRP7A       |
| Deletion      | chr22 | q13.2         | 41,701,092 | 41,704,998 | 3  | -0.981741 | 2.45E-11  | PACSIN2            |

KA III:4

| Type          | Chr  | Cytoband | Start     | Stop      | #Probes | Amplification/Deletion Score | pval      | Gene Names                                                                          |
|---------------|------|----------|-----------|-----------|---------|------------------------------|-----------|-------------------------------------------------------------------------------------|
| Deletion      | chr1 | p36.22   | 9769722   | 9776962   | 4       | -0.74967                     | 1.98E-10  | CLSTN1                                                                              |
| Amplification | chr1 | p34.3    | 34876833  | 34883434  | 4       | 1.35446                      | 1.02E-20  |                                                                                     |
| Deletion      | chr1 | p22.1    | 93181900  | 93192266  | 6       | -0.95988                     | 2.16E-18  | FAM69A                                                                              |
| Deletion      | chr1 | p13.3    | 108535814 | 108538721 | 3       | -2.44862                     | 5.18E-23  | SLC25A24                                                                            |
| Deletion      | chr1 | q21.1    | 147313991 | 147460720 | 25      | -0.61544                     | 1.24E-28  |                                                                                     |
| Amplification | chr1 | q21.3    | 151028700 | 151036494 | 4       | 3.00132                      | 1.78E-42  | LCE1D                                                                               |
| Amplification | chr1 | q31.1    | 187972203 | 188041994 | 12      | 0.99405                      | 1.81E-31  |                                                                                     |
| Deletion      | chr1 | q31.3    | 195009358 | 195065925 | 9       | -0.89878                     | 1.22E-16  | CFHR3, CFHR1                                                                        |
| Deletion      | chr1 | q31.3    | 196572806 | 196576263 | 3       | -1.07132                     | 7.31E-12  |                                                                                     |
| Amplification | chr1 | q42.13   | 227879152 | 227882854 | 4       | 4.13657                      | 3.69E-61  |                                                                                     |
| Amplification | chr1 | q42.2    | 229989433 | 230020527 | 16      | 0.55666                      | 2.18E-13  | TSNAX-DISC1, DISC1, DISC2                                                           |
| Deletion      | chr1 | q44      | 246668425 | 246713399 | 13      | -0.66587                     | 4.75E-19  | OR2T2, OR2T3                                                                        |
| Amplification | chr1 | q44      | 246806669 | 246860610 | 24      | 3.00361                      | 4.84E-247 | OR2T10, OR2T11                                                                      |
| Amplification | chr1 | q44      | 246806669 | 246816762 | 4       | 1.95436                      | 1.78E-11  |                                                                                     |
| Amplification | chr1 | q44      | 246836754 | 246839180 | 3       | 5.04175                      | 4.59E-11  |                                                                                     |
| Amplification | chr2 | p22.3    | 34552935  | 34590056  | 17      | 1.02810                      | 1.34E-39  |                                                                                     |
| Deletion      | chr2 | p22.1    | 40998458  | 41002713  | 4       | -1.31215                     | 1.83E-20  |                                                                                     |
| Amplification | chr2 | p16.3    | 52604016  | 52635754  | 5       | 3.05210                      | 1.80E-51  |                                                                                     |
| Amplification | chr2 | p11.2    | 88914081  | 89231798  | 70      | 1.23924                      | 4.90E-229 |                                                                                     |
| Amplification | chr2 | p11.2    | 88914081  | 88941307  | 14      | 2.95703                      | 8.78E-46  |                                                                                     |
| Amplification | chr2 | p11.2    | 88967005  | 88977899  | 6       | 3.77294                      | 1.12E-30  |                                                                                     |
| Amplification | chr2 | q22.3    | 146582195 | 146592834 | 4       | 4.52363                      | 1.37E-71  |                                                                                     |
| Amplification | chr2 | q31.1    | 176589842 | 176750436 | 110     | 0.29375                      | 1.50E-29  | EVX2, HOXD13, HOXD12, HOXD11, HOXD10, HOXD9, HOXD8, MIR10B, HOXD4, HOXD3, LOC401022 |
| Deletion      | chr2 | q31.2    | 180121271 | 180129739 | 6       | -0.89262                     | 9.19E-15  | ZNF385B                                                                             |
| Amplification | chr2 | q33.2    | 203892886 | 203898393 | 4       | 1.14396                      | 5.51E-12  |                                                                                     |
| Deletion      | chr3 | p22.2    | 37954819  | 37961169  | 6       | -0.95975                     | 7.08E-19  | CTDSPL                                                                              |
| Amplification | chr3 | q24      | 148577529 | 148613407 | 20      | 0.51434                      | 1.49E-17  | ZIC4, ZIC1                                                                          |
| Amplification | chr3 | q26.1    | 164009321 | 164027783 | 5       | 3.26730                      | 2.08E-39  |                                                                                     |
| Deletion      | chr3 | q29      | 194358882 | 194367009 | 6       | -2.91351                     | 2.50E-28  |                                                                                     |
| Amplification | chr3 | q29      | 196835413 | 196929885 | 21      | 1.05532                      | 4.61E-69  | SDHAP2, MIR570                                                                      |
| Amplification | chr3 | q29      | 196957322 | 196961294 | 3       | 1.14785                      | 1.49E-11  | MUC4                                                                                |
| Deletion      | chr4 | p16.1    | 9821327   | 9832882   | 3       | -5.39313                     | 8.99E-42  |                                                                                     |
| Amplification | chr4 | p15.1    | 34457648  | 34491174  | 6       | 3.78495                      | 3.28E-78  |                                                                                     |
| Amplification | chr4 | q13.2    | 70190682  | 70294371  | 5       | 1.08794                      | 2.32E-14  | UGT2B28                                                                             |
| Deletion      | chr4 | q26      | 119345371 | 119348888 | 3       | -1.30804                     | 3.56E-13  | NDST3                                                                               |
| Amplification | chr4 | q35.2    | 190710812 | 190969306 | 79      | 0.35971                      | 7.75E-24  |                                                                                     |

|               |      |                 |           |           |     |          |          |                                                                                                                                                         |
|---------------|------|-----------------|-----------|-----------|-----|----------|----------|---------------------------------------------------------------------------------------------------------------------------------------------------------|
| Amplification | chr5 | q13.2           | 68862665  | 70405715  | 6   | 0.79703  | 3.68E-13 | LOC653391, OCLN, LOC647859, GTF2H2B, GTF2H2C, GTF2H2, GTF2H2D, LOC100272216, GUSBP3, LOC100049076, SERF1A, SERF1B, SMN1, SMN2, LOC100170939, SMA5, NAIP |
| Amplification | chr5 | q21.2 - q21.3   | 104461541 | 104528503 | 12  | 1.09379  | 1.34E-42 | RAB9BP1                                                                                                                                                 |
| Deletion      | chr5 | q22.1           | 110925975 | 110938515 | 5   | -1.00448 | 3.60E-13 |                                                                                                                                                         |
| Amplification | chr5 | q31.2           | 137836466 | 137843368 | 4   | 1.10687  | 6.69E-12 |                                                                                                                                                         |
| Deletion      | chr5 | q33.1           | 150185190 | 150202660 | 7   | -1.06803 | 6.37E-23 |                                                                                                                                                         |
| Deletion      | chr5 | q35.3           | 180342860 | 180362394 | 10  | -0.78024 | 3.10E-21 | BTNL3                                                                                                                                                   |
| Deletion      | chr6 | p21.33          | 29962849  | 30005390  | 14  | -0.83416 | 1.01E-30 | HLA-H, HCG2P7, HCG4P6                                                                                                                                   |
| Amplification | chr6 | p12.1           | 54037199  | 54042793  | 3   | 3.86273  | 3.70E-46 | C6orf142                                                                                                                                                |
| Amplification | chr6 | p12.1           | 55934816  | 55950557  | 5   | 1.07937  | 4.31E-16 |                                                                                                                                                         |
| Amplification | chr6 | q12             | 67068673  | 67105297  | 6   | 1.05272  | 1.36E-21 |                                                                                                                                                         |
| Amplification | chr6 | q16.3           | 103845083 | 103860632 | 3   | 1.09818  | 6.09E-12 |                                                                                                                                                         |
| Amplification | chr6 | q22.33          | 128014072 | 128130943 | 50  | 0.56531  | 1.37E-48 | THEMIS                                                                                                                                                  |
| Amplification | chr6 | q23.2           | 132749309 | 132752540 | 3   | 0.96378  | 3.81E-10 | MOXD1                                                                                                                                                   |
| Deletion      | chr6 | q23.2           | 134631701 | 134635838 | 4   | -1.02495 | 1.50E-12 | SGK1                                                                                                                                                    |
| Deletion      | chr6 | q25.1           | 151549525 | 151552741 | 3   | -1.17997 | 4.96E-14 |                                                                                                                                                         |
| Deletion      | chr6 | q26             | 162003132 | 162013151 | 7   | -0.87116 | 7.98E-19 | PARK2                                                                                                                                                   |
| Amplification | chr6 | q27             | 165645537 | 165649438 | 3   | 3.54618  | 1.35E-35 |                                                                                                                                                         |
| Deletion      | chr7 | p22.3           | 246786    | 254401    | 5   | -0.90511 | 3.08E-16 |                                                                                                                                                         |
| Amplification | chr7 | p15.2           | 27100216  | 27233802  | 102 | 0.39458  | 6.06E-35 | HOXA1, HOXA2, HOXA3, HOXA4, HOXA5, HOXA6, HOXA7, HOXA9, MIR196B, HOXA10, HOXA11, HOXA11AS, HOXA13                                                       |
| Deletion      | chr7 | p14.1           | 38257171  | 38325428  | 34  | -0.51588 | 1.99E-32 | TARP                                                                                                                                                    |
| Amplification | chr7 | q11.22          | 70071668  | 70137737  | 13  | 0.72736  | 4.08E-17 |                                                                                                                                                         |
| Amplification | chr7 | q31.33          | 125833251 | 125837583 | 3   | 3.08976  | 1.22E-24 |                                                                                                                                                         |
| Amplification | chr7 | q34             | 141413352 | 141440243 | 14  | 1.21488  | 3.17E-46 | MGAM                                                                                                                                                    |
| Deletion      | chr7 | q34             | 141698634 | 141714227 | 10  | -3.80088 | 2.92E-81 |                                                                                                                                                         |
| Deletion      | chr7 | q34             | 142156165 | 142167957 | 6   | -2.54588 | 5.61E-64 | TRY6                                                                                                                                                    |
| Amplification | chr7 | q36.3           | 156485711 | 156490539 | 3   | 2.25452  | 2.29E-23 | MNX1                                                                                                                                                    |
| Amplification | chr8 | p11.23 - p11.22 | 39352361  | 39505315  | 59  | 0.83357  | 2.85E-94 | ADAM5P, ADAM3A                                                                                                                                          |
| Amplification | chr8 | q11.21          | 49135352  | 49193641  | 15  | 0.50853  | 3.86E-13 | UBE2V2                                                                                                                                                  |
| Deletion      | chr9 | p21.3           | 23353267  | 23365985  | 3   | -4.46536 | 3.74E-28 |                                                                                                                                                         |

|               |       |               |           |           |      |          |           |                                                                                                                                                                                                                                                                                                                                                                                                                                                                                                                                                                                                                                                                                                                                                               |
|---------------|-------|---------------|-----------|-----------|------|----------|-----------|---------------------------------------------------------------------------------------------------------------------------------------------------------------------------------------------------------------------------------------------------------------------------------------------------------------------------------------------------------------------------------------------------------------------------------------------------------------------------------------------------------------------------------------------------------------------------------------------------------------------------------------------------------------------------------------------------------------------------------------------------------------|
| Deletion      | chr9  | p13.1 - p11.2 | 39091349  | 45359386  | 11   | -0.52963 | 9.03E-11  | CNTNAP3, FAM75A1, FAM75A2, LOC653501, ZNF658B, FAM74A1, FAM75A3, FAM74A3, ZNF658, FAM75A5, FAM75A7, MGC21881, KGFLP2, ANKRD20A2, ANKRD20A3, FAM95B1, FOXD4L2, FOXD4L4, AQP7P3, LOC642929, FAM75A6, KGFLP1, FAM27C                                                                                                                                                                                                                                                                                                                                                                                                                                                                                                                                             |
| Deletion      | chr9  | q21.13        | 78961754  | 78966695  | 3    | -0.92429 | 3.28E-10  |                                                                                                                                                                                                                                                                                                                                                                                                                                                                                                                                                                                                                                                                                                                                                               |
| Amplification | chr10 | p15.1         | 6255513   | 6268572   | 8    | 0.71354  | 1.81E-11  | PFKFB3                                                                                                                                                                                                                                                                                                                                                                                                                                                                                                                                                                                                                                                                                                                                                        |
| Amplification | chr10 | q11.22        | 46388078  | 46568552  | 71   | 0.49544  | 1.95E-30  | SYT15, GPRIN2, PPYR1, LOC643650, LOC728643                                                                                                                                                                                                                                                                                                                                                                                                                                                                                                                                                                                                                                                                                                                    |
| Amplification | chr10 | q11.23        | 52873705  | 52881742  | 6    | 0.77102  | 4.07E-12  | PRKG1                                                                                                                                                                                                                                                                                                                                                                                                                                                                                                                                                                                                                                                                                                                                                         |
| Amplification | chr10 | q24.32        | 104149854 | 104175482 | 22   | 0.47325  | 4.27E-12  | NFKB2, PSD, FBXL15, CUEDC2                                                                                                                                                                                                                                                                                                                                                                                                                                                                                                                                                                                                                                                                                                                                    |
| Amplification | chr11 | p15.5 - p15.4 | 256941    | 3207447   | 1194 | 0.25834  | 2.84E-223 | NLRP6, ATHL1, IFITM5, IFITM2, IFITM1, IFITM3, B4GALNT4, PKP3, SIGIRR, ANO9, PTDSS2, RNH1, HRAS, LRRC56, C11orf35, RASSF7, MIR210, LOC143666, PHRF1, IRF7, CDHR5, SCT, DRD4, DEAF1, TMEM80, EPS8L2, TALDO1, PDDC1, CEED1, SLC25A22, LRDD, RPLP2, SNORA52, PNPLA2, EFCAB4A, CD151, POLR2L, TSPAN4, CHID1, AP2A2, MUC6, MUC2, MUC5B, TOLLIP, LOC255512, BRSK2, MOB2, DUSP8, LOC338651, KRTAP5-1, KRTAP5-2, KRTAP5-3, KRTAP5-4, KRTAP5-5, FAM99A, FAM99B, KRTAP5-6, LOC402778, CTSD, SYT8, TNNT2, LSP1, TNNT3, MRPL23, LOC100133545, H19, MIR675, IGF2, INS-IGF2, MIR483, IGF2AS, INS, TH, ASCL2, C11orf21, TSPAN32, CD81, TSSC4, TRPM5, KCNQ1, KCNQ1OT1, KCNQ1DN, CDKN1C, SLC22A18A5, SLC22A18, PHLDA2, NAP1L4, SNORA54, CARS, OSBPPL5, MRGPRG, C11orf36, MRGPRE |
| Amplification | chr11 | p15.4         | 4926583   | 4932273   | 5    | 1.06889  | 1.85E-17  |                                                                                                                                                                                                                                                                                                                                                                                                                                                                                                                                                                                                                                                                                                                                                               |
| Deletion      | chr11 | p15.4         | 5742476   | 5765497   | 15   | -4.45340 | 1.04E-182 | OR52N5                                                                                                                                                                                                                                                                                                                                                                                                                                                                                                                                                                                                                                                                                                                                                        |
| Deletion      | chr11 | p15.4         | 7762277   | 7783551   | 9    | -1.07659 | 1.33E-26  | OR5P2                                                                                                                                                                                                                                                                                                                                                                                                                                                                                                                                                                                                                                                                                                                                                         |
| Amplification | chr11 | q23.3         | 118712459 | 118736201 | 13   | 0.65166  | 2.27E-13  | RNF26, C1QTNF5, MFRP, USP2                                                                                                                                                                                                                                                                                                                                                                                                                                                                                                                                                                                                                                                                                                                                    |
| Amplification | chr11 | q24.3         | 129802472 | 129806879 | 4    | 1.15158  | 2.01E-12  | ADAMTS8                                                                                                                                                                                                                                                                                                                                                                                                                                                                                                                                                                                                                                                                                                                                                       |
| Amplification | chr12 | p13.33        | 100682    | 260665    | 79   | 0.32718  | 2.31E-26  | IQSEC3, LOC574538, SLC6A12, SLC6A13, KDM5A                                                                                                                                                                                                                                                                                                                                                                                                                                                                                                                                                                                                                                                                                                                    |

|               |       |               |           |           |     |          |           |                                                                                                       |
|---------------|-------|---------------|-----------|-----------|-----|----------|-----------|-------------------------------------------------------------------------------------------------------|
| Amplification | chr12 | p13.31        | 9528590   | 9610113   | 16  | 1.45235  | 2.83E-63  |                                                                                                       |
| Amplification | chr12 | p13.2         | 11109483  | 11147734  | 13  | 0.65351  | 1.79E-15  | PRR4, PRH1, TAS2R43                                                                                   |
| Amplification | chr12 | p13.2         | 11419189  | 11435698  | 6   | 1.05961  | 1.20E-19  |                                                                                                       |
| Amplification | chr12 | p12.3         | 19380678  | 19384394  | 3   | 1.04147  | 1.47E-11  | PLEKHA5                                                                                               |
| Amplification | chr12 | q13.13        | 52604587  | 52729992  | 121 | 0.39712  | 6.56E-33  | HOXC13, HOXC12, HOTAIR, HOXC11, HOXC10, MIR196A2, HOXC9, HOXC8, HOXC4, HOXC5, HOXC6, MIR615           |
| Amplification | chr12 | q23.1         | 98318378  | 98320224  | 3   | 1.19653  | 7.96E-13  | ANKS1B                                                                                                |
| Amplification | chr13 | q14.11        | 42497481  | 42504644  | 5   | 1.58098  | 3.94E-38  | DNAJC15                                                                                               |
| Deletion      | chr14 | q11.2         | 21481361  | 22022119  | 267 | -0.42741 | 1.05E-137 |                                                                                                       |
| Deletion      | chr14 | q12           | 23740511  | 23744018  | 3   | -0.97903 | 1.29E-10  |                                                                                                       |
| Deletion      | chr14 | q13.2         | 34676390  | 34683869  | 3   | -5.36483 | 2.99E-36  | KIAA0391                                                                                              |
| Deletion      | chr14 | q24.3         | 73072457  | 73092168  | 7   | -2.83504 | 1.98E-57  | HEATR4, ACOT1                                                                                         |
| Amplification | chr14 | q31.1         | 79176037  | 79183213  | 4   | 1.26183  | 8.14E-15  | NRXN3                                                                                                 |
| Amplification | chr14 | q32.2         | 98799004  | 98810201  | 9   | 0.76740  | 2.16E-11  | BCL11B                                                                                                |
| Amplification | chr14 | q32.33        | 105314254 | 105428738 | 41  | 2.62176  | NA        |                                                                                                       |
| Amplification | chr14 | q32.33        | 105397801 | 105401460 | 3   | 0.45984  | 1.11E-43  |                                                                                                       |
| Amplification | chr14 | q32.33        | 105403001 | 105416455 | 7   | 4.23307  | 6.23E-17  |                                                                                                       |
| Amplification | chr14 | q32.33        | 105432521 | 105597614 | 38  | 0.91288  | 4.81E-79  | KIAA0125, ADAM6                                                                                       |
| Deletion      | chr14 | q32.33        | 105602602 | 105632227 | 12  | -3.96205 | 4.08E-102 |                                                                                                       |
| Amplification | chr14 | q32.33        | 105681007 | 105761975 | 14  | 1.00212  | 2.00E-33  |                                                                                                       |
| Amplification | chr14 | q32.33        | 105788623 | 105795857 | 5   | 1.01005  | 4.10E-17  |                                                                                                       |
| Amplification | chr14 | q32.33        | 105856972 | 105881952 | 6   | 2.23271  | 1.54E-54  |                                                                                                       |
| Amplification | chr15 | q11.2         | 18741716  | 20088315  | 150 | 0.95955  | NA        | GOLGA6L6, GOLGA8C, BCL8, LOC646214, CXADRP2, POTE8, NF1P1, LOC727924, OR4M2, OR4N4, OR4N3P, LOC646396 |
| Amplification | chr15 | q11.2         | 18842565  | 18848268  | 4   | 2.06699  | 1.58E-14  |                                                                                                       |
| Amplification | chr15 | q14           | 35174207  | 35182676  | 5   | 0.82727  | 2.20E-11  | MEIS2                                                                                                 |
| Amplification | chr15 | q24.3         | 74671626  | 74680397  | 3   | 2.65532  | 2.80E-22  | SCAPER                                                                                                |
| Amplification | chr16 | p11.2         | 28511295  | 28529999  | 6   | 1.02959  | 6.19E-16  | SULT1A2, SULT1A1                                                                                      |
| Deletion      | chr16 | p11.2         | 32481309  | 33647915  | 46  | -0.30130 | 4.73E-14  | TP53TG3B, TP53TG3, SLC6A10P, LOC390705                                                                |
| Deletion      | chr16 | p11.2 - p11.1 | 34325501  | 34596714  | 51  | -0.38447 | 5.07E-23  | LOC283914, LOC146481                                                                                  |
| Amplification | chr16 | q22.1         | 68732367  | 68753268  | 8   | 0.97235  | 3.08E-20  | PDPR                                                                                                  |
| Amplification | chr16 | q22.3         | 72929786  | 72964842  | 7   | 0.84348  | 1.52E-13  | LOC283922                                                                                             |
| Amplification | chr17 | p13.3         | 1906319   | 1906436   | 3   | 2.33774  | 1.35E-33  | HIC1                                                                                                  |
| Deletion      | chr17 | p13.3         | 3063413   | 3103283   | 6   | -0.73076 | 4.00E-11  | OR1A1, LOC653166                                                                                      |
| Amplification | chr17 | q12           | 31461588  | 31891594  | 21  | 1.06319  | 1.74E-59  | TBC1D3B, CCL3L1, CCL3L3, CCL4L2, CCL4L1, TBC1D3C, TBC1D3F, TBC1D3H, TBC1D3G                           |
| Amplification | chr17 | q21.2         | 36675987  | 36684678  | 6   | 2.40085  | 1.19E-31  |                                                                                                       |
| Deletion      | chr17 | q21.31        | 41521544  | 41710444  | 67  | -0.92152 | 2.07E-200 | KIAA1267                                                                                              |
| Amplification | chr18 | q12.2         | 33067718  | 33419351  | 171 | 0.30483  | 1.11E-31  | CELF4                                                                                                 |

|               |       |               |          |          |     |          |           |                                                                                       |
|---------------|-------|---------------|----------|----------|-----|----------|-----------|---------------------------------------------------------------------------------------|
| Amplification | chr18 | q23           | 75243011 | 75819856 | 221 | 0.27167  | 2.19E-30  | NFATC1, CTDP1, KCNG2, PQLC1                                                           |
| Amplification | chr19 | p13.3         | 1200840  | 1205738  | 5   | 1.37121  | 2.82E-14  | MIDN                                                                                  |
| Deletion      | chr19 | q13.12        | 40543992 | 40553374 | 3   | -0.98148 | 3.05E-11  |                                                                                       |
| Deletion      | chr19 | q13.33        | 56825794 | 56840401 | 8   | -3.93906 | 2.89E-64  | SIGLEC14                                                                              |
| Deletion      | chr19 | q13.42        | 59421197 | 59434253 | 10  | -0.45592 | 1.80E-12  | LILRA6                                                                                |
| Deletion      | chr20 | p13           | 1511632  | 1532485  | 10  | -3.16904 | 6.13E-70  | SIRPB1                                                                                |
| Deletion      | chr20 | q13.12        | 45214159 | 45220263 | 4   | -0.81074 | 3.29E-11  | EYA2                                                                                  |
| Amplification | chr20 | q13.2         | 52081719 | 52090452 | 5   | 0.98651  | 6.80E-11  | BCAS1                                                                                 |
| Amplification | chr21 | p11.2 - p11.1 | 9882922  | 10022365 | 10  | 0.77975  | 5.28E-20  | TPTE                                                                                  |
| Deletion      | chr21 | q21.1         | 22577751 | 22585099 | 3   | -1.11685 | 7.41E-13  |                                                                                       |
| Amplification | chr22 | q11.22        | 20729331 | 21576911 | 403 | 1.16525  | NA        | VPREB1, LOC96610, ZNF280B, ZNF280A, PRAME, LOC648691, POM121L1P, GGTL2, MIR650, IGLL5 |
| Amplification | chr22 | q11.22        | 20729331 | 21368161 | 277 | 0.82328  | 3.11E-89  | VPREB1, LOC96610, ZNF280B, ZNF280A, PRAME, LOC648691, POM121L1P, GGTL2                |
| Amplification | chr22 | q11.22        | 20797302 | 20842378 | 23  | 0.43062  | 8.19E-12  |                                                                                       |
| Amplification | chr22 | q11.22        | 21371845 | 21576911 | 125 | 2.72689  | NA        | MIR650, IGLL5                                                                         |
| Amplification | chr22 | q11.22        | 21405998 | 21423633 | 7   | 1.75653  | 1.08E-15  |                                                                                       |
| Amplification | chr22 | q11.22        | 21558810 | 21570286 | 6   | 3.95669  | 9.94E-11  | IGLL5                                                                                 |
| Deletion      | chr22 | q11.23        | 22677959 | 22725353 | 22  | -0.78007 | 7.43E-53  | LOC391322, GSTT1, GSTTP2                                                              |
| Deletion      | chr22 | q13.1         | 37689058 | 37715431 | 16  | -3.45870 | 2.31E-176 | APOBEC3A, APOBEC3B                                                                    |
| Amplification | chr22 | q13.2         | 41226643 | 41279529 | 11  | 0.93065  | 6.68E-23  | SERHL, RRP7A                                                                          |



## KA III:6

| Type          | Chr  | Cytoband | Start       | Stop        | #Probes | Amplification/Deletion Score | pval      | Gene Names                                                                                                                                  |
|---------------|------|----------|-------------|-------------|---------|------------------------------|-----------|---------------------------------------------------------------------------------------------------------------------------------------------|
| Amplification | chr1 | p36.23   | 7,485,935   | 7,503,645   | 10      | 0.799972                     | 1.85E-11  | CAMTA1                                                                                                                                      |
| Deletion      | chr1 | p36.22   | 9,769,722   | 9,776,962   | 4       | -0.940953                    | 1.77E-14  | CLSTN1                                                                                                                                      |
| Amplification | chr1 | p36.13   | 17,107,476  | 17,154,087  | 8       | 0.983163                     | 9.14E-16  | CROCC                                                                                                                                       |
| Amplification | chr1 | p34.3    | 34,876,833  | 34,883,434  | 4       | 1.307595                     | 1.38E-16  |                                                                                                                                             |
| Amplification | chr1 | p22.2    | 90,939,932  | 90,968,837  | 16      | 0.450032                     | 1.00E-12  | BARHL2                                                                                                                                      |
| Amplification | chr1 | q21.3    | 151,028,700 | 151,036,494 | 4       | 3.375635                     | 4.86E-51  | LCE1D                                                                                                                                       |
| Amplification | chr1 | q31.1    | 187,972,203 | 188,041,994 | 12      | 0.821697                     | 3.83E-27  |                                                                                                                                             |
| Deletion      | chr1 | q31.3    | 196,572,806 | 196,576,263 | 3       | -5.398414                    | 1.54E-53  |                                                                                                                                             |
| Amplification | chr1 | q42.13   | 227,879,152 | 227,882,854 | 4       | 3.319006                     | 3.15E-56  |                                                                                                                                             |
| Amplification | chr1 | q42.2    | 229,989,433 | 230,020,527 | 16      | 0.638462                     | 1.29E-13  | TSNAX-DISC1, DISC1, DISC2                                                                                                                   |
| Amplification | chr1 | q44      | 246,794,552 | 246,806,728 | 3       | 1.566237                     | 8.35E-14  | OR2T34                                                                                                                                      |
| Amplification | chr1 | q44      | 246,811,355 | 246,860,610 | 23      | 3.350189                     | 9.50E-278 | OR2T10, OR2T11                                                                                                                              |
| Amplification | chr2 | p22.3    | 34,552,935  | 34,590,056  | 17      | 0.932232                     | 2.07E-33  |                                                                                                                                             |
| Deletion      | chr2 | p22.1    | 40,998,458  | 41,002,713  | 4       | -1.147266                    | 2.24E-12  |                                                                                                                                             |
| Amplification | chr2 | p11.2    | 88,251,602  | 88,256,430  | 4       | 1.009648                     | 1.34E-10  | THNSL2                                                                                                                                      |
| Amplification | chr2 | p11.2    | 88,914,081  | 88,941,307  | 14      | 3.167683                     | 1.77E-57  |                                                                                                                                             |
| Amplification | chr2 | p11.2    | 88,914,081  | 89,231,798  | 70      | 1.296759                     | 9.58E-242 |                                                                                                                                             |
| Amplification | chr2 | p11.2    | 88,967,005  | 88,977,899  | 6       | 3.704756                     | 2.84E-35  |                                                                                                                                             |
| Amplification | chr2 | p11.2    | 88,984,458  | 89,231,798  | 35      | 0.853101                     | 1.12E-18  |                                                                                                                                             |
| Amplification | chr2 | q22.3    | 146,582,195 | 146,592,834 | 4       | 3.425482                     | 7.19E-57  |                                                                                                                                             |
| Amplification | chr2 | q31.1    | 176,639,713 | 176,750,436 | 88      | 0.427463                     | 5.73E-55  | EVX2, HOXD13, HOXD12, HOXD11, HOXD10, HOXD9, HOXD8, MIR10B, HOXD4, HOXD3, LOC401022                                                         |
| Deletion      | chr2 | q31.2    | 180,121,271 | 180,129,739 | 6       | -1.158647                    | 2.75E-19  | ZNF385B                                                                                                                                     |
| Deletion      | chr3 | q13.31   | 116,140,997 | 116,147,005 | 4       | -1.103737                    | 2.36E-12  | ZBTB20                                                                                                                                      |
| Amplification | chr3 | q24      | 148,562,730 | 148,630,373 | 32      | 0.499425                     | 8.12E-28  | ZIC4, ZIC1                                                                                                                                  |
| Amplification | chr3 | q26.1    | 164,009,321 | 164,027,783 | 5       | 3.069671                     | 4.09E-48  |                                                                                                                                             |
| Amplification | chr3 | q27.1    | 185,324,773 | 185,976,854 | 282     | 0.30838                      | 2.78E-70  | EIF2B5, DVL3, AP2M1, ABCF3, VWA5B2, MIR1224, ALG3, ECE2, CAMK2N2, PSMD2, EIF4G1, SNORD66, FAM131A, CLCN2, POLR2H, THPO, CHR1, EPHB3, MAGEF1 |
| Deletion      | chr3 | q29      | 194,358,882 | 194,367,009 | 6       | -3.255017                    | 2.21E-49  |                                                                                                                                             |
| Amplification | chr3 | q29      | 196,835,413 | 196,929,845 | 20      | 1.111955                     | 5.49E-66  | SDHAP2, MIR570                                                                                                                              |
| Amplification | chr3 | q29      | 196,957,322 | 196,961,294 | 3       | 1.208343                     | 2.81E-10  | MUC4                                                                                                                                        |
| Amplification | chr4 | p16.2    | 4,901,977   | 4,913,808   | 7       | 1.031102                     | 1.71E-17  | MSX1                                                                                                                                        |
| Amplification | chr4 | p15.1    | 34,457,648  | 34,491,174  | 6       | 4.05414                      | 2.05E-91  |                                                                                                                                             |
| Deletion      | chr4 | p14      | 39,588,553  | 39,593,736  | 4       | -1.022786                    | 9.70E-13  | PDS5A                                                                                                                                       |
| Deletion      | chr4 | q26      | 119,345,371 | 119,348,888 | 3       | -1.381392                    | 1.13E-13  | NDST3                                                                                                                                       |
| Amplification | chr4 | q35.1    | 183,958,648 | 184,012,034 | 21      | 0.519454                     | 6.93E-16  | ODZ3                                                                                                                                        |

|               |      |               |             |             |     |           |          |                                                                                                         |
|---------------|------|---------------|-------------|-------------|-----|-----------|----------|---------------------------------------------------------------------------------------------------------|
| Amplification | chr5 | q21.2 - q21.3 | 104,461,541 | 104,528,503 | 12  | 1.053439  | 1.09E-40 | RAB9BP1                                                                                                 |
| Amplification | chr5 | q31.2         | 137,836,466 | 137,843,368 | 4   | 1.10533   | 7.76E-11 |                                                                                                         |
| Amplification | chr5 | q35.2         | 174,089,673 | 174,121,761 | 11  | 0.773967  | 5.71E-12 | MSX2                                                                                                    |
| Amplification | chr5 | q35.3         | 179,152,726 | 179,159,868 | 9   | 0.891896  | 5.70E-14 | LTC4S, MGAT4B, MIR1229                                                                                  |
| Deletion      | chr5 | q35.3         | 180,342,860 | 180,359,036 | 9   | -0.727492 | 6.91E-14 | BTNL3                                                                                                   |
| Amplification | chr6 | p25.3         | 1,322,879   | 1,337,620   | 7   | 0.933593  | 1.76E-14 | FOXF2                                                                                                   |
| Amplification | chr6 | p25.3         | 1,548,953   | 1,586,331   | 17  | 0.718747  | 5.34E-19 | FOXC1, GMDS                                                                                             |
| Amplification | chr6 | p21.32        | 32,558,677  | 32,601,021  | 10  | 2.873589  | 4.82E-77 | HLA-DRB5                                                                                                |
| Deletion      | chr6 | p21.32        | 32,756,637  | 32,762,120  | 4   | -1.434463 | 3.12E-24 |                                                                                                         |
| Amplification | chr6 | p12.1         | 54,037,199  | 54,042,793  | 3   | 4.181913  | 6.93E-50 | C6orf142                                                                                                |
| Amplification | chr6 | p12.1         | 55,934,816  | 55,946,682  | 4   | 1.05145   | 1.95E-15 |                                                                                                         |
| Amplification | chr6 | q12           | 67,068,673  | 67,101,414  | 5   | 0.901301  | 5.27E-15 |                                                                                                         |
| Amplification | chr6 | q14.1         | 79,024,557  | 79,091,909  | 13  | 0.911693  | 1.82E-33 |                                                                                                         |
| Deletion      | chr6 | q26           | 162,003,132 | 162,013,151 | 7   | -0.789695 | 3.25E-13 | PARK2                                                                                                   |
| Amplification | chr6 | q27           | 165,645,537 | 165,650,669 | 4   | 3.497435  | 2.88E-49 |                                                                                                         |
| Deletion      | chr7 | p22.3         | 246,786     | 254,401     | 5   | -0.870138 | 9.98E-17 |                                                                                                         |
| Amplification | chr7 | p15.2         | 26,103,844  | 26,112,625  | 3   | 1.042359  | 2.63E-10 |                                                                                                         |
| Amplification | chr7 | p15.2         | 27,100,216  | 27,260,366  | 115 | 0.447721  | 1.59E-60 | HOXA1, HOXA2, HOXA3, HOXA4, HOXA5, HOXA6, HOXA7, HOXA9, MIR196B, HOXA10, HOXA11, HOXA11AS, HOXA13, EVX1 |
| Deletion      | chr7 | p14.1         | 38,274,436  | 38,320,676  | 26  | -0.55248  | 4.15E-22 | TARP                                                                                                    |
| Amplification | chr7 | q11.21        | 64,357,426  | 64,365,922  | 4   | 1.24054   | 1.08E-12 |                                                                                                         |
| Amplification | chr7 | q11.22        | 70,071,668  | 70,137,737  | 13  | 0.745611  | 7.11E-14 |                                                                                                         |
| Amplification | chr7 | q31.33        | 125,833,251 | 125,837,583 | 3   | 3.240437  | 8.22E-31 |                                                                                                         |
| Amplification | chr7 | q34           | 141,413,352 | 141,438,563 | 13  | 1.110734  | 7.08E-38 | MGAM                                                                                                    |
| Deletion      | chr7 | q34           | 141,698,634 | 141,714,227 | 10  | -3.432949 | 4.88E-89 |                                                                                                         |
| Deletion      | chr7 | q34           | 142,156,165 | 142,166,758 | 4   | -1.03929  | 4.26E-13 | TRY6                                                                                                    |
| Amplification | chr7 | q36.3         | 156,485,711 | 156,504,100 | 10  | 1.130037  | 6.45E-25 | MNX1                                                                                                    |
| Amplification | chr8 | q11.21        | 49,143,460  | 49,193,641  | 11  | 0.668258  | 1.20E-14 |                                                                                                         |

|               |       |        |             |             |      |          |          |                                                                                                                                                                                                                                                                                                                                                                                                                                                                                                                                                                                                                                                                                                                                                                                                                |
|---------------|-------|--------|-------------|-------------|------|----------|----------|----------------------------------------------------------------------------------------------------------------------------------------------------------------------------------------------------------------------------------------------------------------------------------------------------------------------------------------------------------------------------------------------------------------------------------------------------------------------------------------------------------------------------------------------------------------------------------------------------------------------------------------------------------------------------------------------------------------------------------------------------------------------------------------------------------------|
| Amplification | chr8  | q24.3  | 142,081,172 | 146,091,894 | 1443 | 0.315705 | NA       | DENND3, SLC45A4, LOC731779, GPR20, PTP4A3, FLJ43860, NCRNA00051, TSNARE1, BAI1, ARC, JRK, PSCA, LY6K, C8orf55, SLURP1, LYPD2, LYNX1, LY6D, GML, CYP11B1, CYP11B2, LOC100133669, LY6E, C8orf31, LY6H, GPIHBP1, ZFP41, GLI4, ZNF696, TOP1MT, C8orf51, RHPN1, MAFA, ZC3H3, GSDMD, C8orf73, NAPRT1, EEF1D, TIGD5, PYCRL, TSTA3, ZNF623, ZNF707, BREAZ, LOC100130274, MAPK15, FAM83H, LOC100128338, SCRIB, MIR937, PUF60, NRBP2, EPPK1, PLEC, MIR661, PARP10, GRINA, SPATC1, OPLAH, EXOSC4, GPAA1, CYC1, SHARPIN, MAF1, KIAA1875, C8orf30A, HEATR7A, SCXB, SCXA, BOP1, HSF1, DGAT1, SCRT1, C8ORFK29, FBXL6, GPR172A, ADCK5, CPSF1, MIR939, MIR1234, SLC39A4, VPS28, NFKBIL2, CYHR1, KIFC2, FOXH1, PPP1R16A, GPT, MFSD3, RECQL4, LRR14, LRR24, MGC70857, ARHGAP39, ZNF251, ZNF34, RPL8, ZNF517, ZNF7, COMMD5, ZNF250 |
| Amplification | chr9  | p21.1  | 28,173,829  | 28,182,980  | 6    | 0.79188  | 5.94E-13 | LINGO2                                                                                                                                                                                                                                                                                                                                                                                                                                                                                                                                                                                                                                                                                                                                                                                                         |
| Amplification | chr10 | p15.1  | 6,255,513   | 6,268,572   | 8    | 0.789232 | 6.12E-12 | PFKFB3                                                                                                                                                                                                                                                                                                                                                                                                                                                                                                                                                                                                                                                                                                                                                                                                         |
| Amplification | chr10 | p12.31 | 21,746,318  | 21,864,790  | 71   | 0.345248 | 1.49E-23 | C10orf114, MIR1915, C10orf140, MLLT10                                                                                                                                                                                                                                                                                                                                                                                                                                                                                                                                                                                                                                                                                                                                                                          |
| Amplification | chr10 | q11.22 | 46,384,985  | 46,568,552  | 72   | 0.503168 | 3.74E-28 | SYT15, GPRIN2, PPYR1, LOC643650, LOC728643                                                                                                                                                                                                                                                                                                                                                                                                                                                                                                                                                                                                                                                                                                                                                                     |
| Amplification | chr10 | q11.23 | 52,873,705  | 52,881,742  | 6    | 1.027098 | 6.15E-21 | PRKG1                                                                                                                                                                                                                                                                                                                                                                                                                                                                                                                                                                                                                                                                                                                                                                                                          |

|               |       |               |             |             |      |           |           |                                                                                                                                                                                                                                                                                                                                                                                                                                                                                                                                                                                                                                                                                                                                                             |
|---------------|-------|---------------|-------------|-------------|------|-----------|-----------|-------------------------------------------------------------------------------------------------------------------------------------------------------------------------------------------------------------------------------------------------------------------------------------------------------------------------------------------------------------------------------------------------------------------------------------------------------------------------------------------------------------------------------------------------------------------------------------------------------------------------------------------------------------------------------------------------------------------------------------------------------------|
| Amplification | chr11 | p15.5 - p15.4 | 261,603     | 3,213,228   | 1194 | 0.351526  | NA        | NLRP6, ATHL1, IFITM5, IFITM2, IFITM1, IFITM3, B4GALNT4, PKP3, SIGIRR, ANO9, PTDSS2, RNH1, HRAS, LRRC56, C11orf35, RASSF7, MIR210, LOC143666, PHRF1, IRF7, CDHR5, SCT, DRD4, DEAF1, TMEM80, EPS8L2, TALDO1, PDDC1, CEND1, SLC25A22, LRDD, RPLP2, SNORA52, PNPLA2, EFCAB4A, CD151, POLR2L, TSPAN4, CHID1, AP2A2, MUC6, MUC2, MUC5B, TOLLIP, LOC255512, BRSK2, MOB2, DUSP8, LOC338651, KRTAP5-1, KRTAP5-2, KRTAP5-3, KRTAP5-4, KRTAP5-5, FAM99A, FAM99B, KRTAP5-6, LOC402778, CTSD, SYT8, TNNI2, LSP1, TNNT3, MRPL23, LOC100133545, H19, MIR675, IGF2, INS-IGF2, MIR483, IGF2AS, INS, TH, ASCL2, C11orf21, TSPAN32, CD81, TSSC4, TRPM5, KCNQ1, KCNQ1OT1, KCNQ1DN, CDKN1C, SLC22A18AS, SLC22A18, PHLDA2, NAP1L4, SNORA54, CARS, OSBP5, MRGPRG, C11orf36, MRGPRE |
| Deletion      | chr11 | p15.4         | 5,741,031   | 5,769,835   | 18   | -1.141029 | 6.28E-61  | OR52N5, OR52N1                                                                                                                                                                                                                                                                                                                                                                                                                                                                                                                                                                                                                                                                                                                                              |
| Deletion      | chr11 | p15.4         | 7,774,067   | 7,783,551   | 7    | -4.728037 | 1.65E-111 | OR5P2                                                                                                                                                                                                                                                                                                                                                                                                                                                                                                                                                                                                                                                                                                                                                       |
| Amplification | chr11 | p15.2         | 14,224,305  | 14,258,953  | 19   | 0.489635  | 1.03E-13  | SPON1, RRAS2                                                                                                                                                                                                                                                                                                                                                                                                                                                                                                                                                                                                                                                                                                                                                |
| Amplification | chr11 | p15.1         | 18,906,505  | 18,917,242  | 6    | 0.882046  | 3.85E-12  | MRGPRX1                                                                                                                                                                                                                                                                                                                                                                                                                                                                                                                                                                                                                                                                                                                                                     |
| Amplification | chr11 | q23.3         | 118,712,459 | 118,736,201 | 13   | 0.848633  | 1.58E-16  | RNF26, C1QTNF5, MFRP, USP2                                                                                                                                                                                                                                                                                                                                                                                                                                                                                                                                                                                                                                                                                                                                  |
| Amplification | chr11 | q24.3         | 129,802,472 | 129,806,879 | 4    | 1.126169  | 6.94E-12  | ADAMTS8                                                                                                                                                                                                                                                                                                                                                                                                                                                                                                                                                                                                                                                                                                                                                     |
| Amplification | chr12 | p13.33        | 111,454     | 195,230     | 45   | 0.488018  | 9.40E-30  | IQSEC3, LOC574538, SLC6A12                                                                                                                                                                                                                                                                                                                                                                                                                                                                                                                                                                                                                                                                                                                                  |
| Amplification | chr12 | p13.31        | 9,528,590   | 9,573,372   | 8    | 1.453721  | 3.70E-30  |                                                                                                                                                                                                                                                                                                                                                                                                                                                                                                                                                                                                                                                                                                                                                             |
| Amplification | chr12 | p13.2         | 11,109,483  | 11,140,477  | 11   | 0.745912  | 1.23E-16  | PRR4, PRH1, TAS2R43                                                                                                                                                                                                                                                                                                                                                                                                                                                                                                                                                                                                                                                                                                                                         |
| Amplification | chr12 | q13.13        | 49,269,874  | 49,278,336  | 5    | 0.844432  | 1.23E-10  | DIP2B                                                                                                                                                                                                                                                                                                                                                                                                                                                                                                                                                                                                                                                                                                                                                       |
| Amplification | chr12 | q13.13        | 52,616,438  | 52,730,998  | 117  | 0.53354   | 8.84E-52  | HOXC13, HOXC12, HOTAIR, HOXC11, HOXC10, MIR196A2, HOXC9, HOXC8, HOXC4, HOXC5, HOXC6, MIR615                                                                                                                                                                                                                                                                                                                                                                                                                                                                                                                                                                                                                                                                 |
| Deletion      | chr12 | q24.31        | 119,790,502 | 119,802,251 | 6    | -0.727318 | 1.74E-12  | SPPL3                                                                                                                                                                                                                                                                                                                                                                                                                                                                                                                                                                                                                                                                                                                                                       |
| Amplification | chr12 | q24.33        | 128,869,663 | 128,885,302 | 9    | 0.813393  | 5.41E-12  | TMEM132D                                                                                                                                                                                                                                                                                                                                                                                                                                                                                                                                                                                                                                                                                                                                                    |
| Deletion      | chr13 | q13.2         | 33,033,905  | 33,042,616  | 3    | -1.229684 | 1.14E-12  |                                                                                                                                                                                                                                                                                                                                                                                                                                                                                                                                                                                                                                                                                                                                                             |
| Amplification | chr13 | q14.11        | 42,497,481  | 42,504,644  | 5    | 1.794462  | 1.79E-43  | DNAJC15                                                                                                                                                                                                                                                                                                                                                                                                                                                                                                                                                                                                                                                                                                                                                     |
| Deletion      | chr13 | q21.1         | 56,657,371  | 56,685,400  | 15   | -1.11487  | 2.03E-40  |                                                                                                                                                                                                                                                                                                                                                                                                                                                                                                                                                                                                                                                                                                                                                             |
| Deletion      | chr14 | q11.2         | 21,462,313  | 22,003,174  | 262  | -0.38186  | 3.57E-99  |                                                                                                                                                                                                                                                                                                                                                                                                                                                                                                                                                                                                                                                                                                                                                             |

|               |       |               |             |             |     |           |            |                                                                                                       |
|---------------|-------|---------------|-------------|-------------|-----|-----------|------------|-------------------------------------------------------------------------------------------------------|
| Deletion      | chr14 | q24.3         | 73,072,457  | 73,092,168  | 7   | -2.128312 | 7.88E-49   | HEATR4, ACOT1                                                                                         |
| Amplification | chr14 | q31.1         | 79,176,037  | 79,183,213  | 4   | 1.057981  | 6.83E-11   | NRXN3                                                                                                 |
| Amplification | chr14 | q32.2         | 98,762,970  | 98,812,371  | 29  | 0.595675  | 5.71E-15   | BCL11B                                                                                                |
| Amplification | chr14 | q32.33        | 105,314,254 | 105,425,486 | 40  | 2.650052  | NA         |                                                                                                       |
| Amplification | chr14 | q32.33        | 105,397,801 | 105,401,460 | 3   | 0.33127   | 9.05E-44   |                                                                                                       |
| Amplification | chr14 | q32.33        | 105,403,001 | 105,416,455 | 7   | 4.596069  | 8.92E-23   |                                                                                                       |
| Amplification | chr14 | q32.33        | 105,428,694 | 105,597,614 | 39  | 0.865377  | 3.49E-46   | KIAA0125, ADAM6                                                                                       |
| Deletion      | chr14 | q32.33        | 105,602,602 | 105,632,227 | 12  | -2.704921 | 4.23E-108  |                                                                                                       |
| Amplification | chr14 | q32.33        | 105,707,746 | 105,760,600 | 11  | 0.892021  | 2.01E-16   |                                                                                                       |
| Amplification | chr14 | q32.33        | 105,856,972 | 105,875,983 | 4   | 3.364777  | 3.24E-51   |                                                                                                       |
| Amplification | chr15 | q11.2         | 18,741,716  | 20,079,994  | 149 | 0.909597  | 1.023e-317 | GOLGA6L6, GOLGA8C, BCL8, LOC646214, CXADRP2, POTE8, NF1P1, LOC727924, OR4M2, OR4N4, OR4N3P, LOC646396 |
| Deletion      | chr15 | q14           | 32,517,839  | 32,594,245  | 24  | -1.123024 | 2.01E-71   |                                                                                                       |
| Amplification | chr15 | q14           | 35,174,207  | 35,183,663  | 6   | 0.8799    | 6.00E-14   | MEIS2                                                                                                 |
| Amplification | chr15 | q24.3         | 74,671,626  | 74,680,498  | 4   | 2.591593  | 1.74E-36   | SCAPER                                                                                                |
| Deletion      | chr15 | q26.3         | 98,234,519  | 98,239,513  | 3   | -4.324811 | 3.14E-53   |                                                                                                       |
| Deletion      | chr16 | p11.2 - p11.1 | 34,325,501  | 34,584,850  | 49  | -0.449011 | 3.10E-27   | LOC283914, LOC146481                                                                                  |
| Deletion      | chr16 | q22.3         | 70,641,420  | 70,665,497  | 8   | -0.957464 | 3.15E-22   | HP, HPR                                                                                               |
| Amplification | chr17 | p13.3         | 1,906,319   | 1,906,436   | 3   | 2.402664  | 2.57E-35   | HIC1                                                                                                  |
| Amplification | chr17 | q21.2         | 36,675,987  | 36,684,678  | 6   | 2.913734  | 1.03E-45   |                                                                                                       |
| Deletion      | chr17 | q21.31        | 41,521,544  | 41,710,444  | 67  | -0.910044 | 1.85E-198  | KIAA1267                                                                                              |
| Amplification | chr17 | q23.2         | 58,081,985  | 58,145,156  | 32  | 0.400926  | 2.98E-15   | MRC2, MARCH10                                                                                         |
| Amplification | chr18 | q12.2         | 33,098,249  | 33,419,351  | 158 | 0.372887  | 3.24E-58   | CELF4                                                                                                 |

|               |       |                |            |            |      |           |           |                                                                                                                                                                                                                                                                                                                                                                                                                                                                                                                                                                                                                                                                                                                                                                                                                                                                                                                                                                                                                                                                                                                                                                                                                                                                                                                                                                                                                                                                                              |
|---------------|-------|----------------|------------|------------|------|-----------|-----------|----------------------------------------------------------------------------------------------------------------------------------------------------------------------------------------------------------------------------------------------------------------------------------------------------------------------------------------------------------------------------------------------------------------------------------------------------------------------------------------------------------------------------------------------------------------------------------------------------------------------------------------------------------------------------------------------------------------------------------------------------------------------------------------------------------------------------------------------------------------------------------------------------------------------------------------------------------------------------------------------------------------------------------------------------------------------------------------------------------------------------------------------------------------------------------------------------------------------------------------------------------------------------------------------------------------------------------------------------------------------------------------------------------------------------------------------------------------------------------------------|
| Amplification | chr19 | p13.3 - p13.11 | 218,636    | 19,724,695 | 9039 | 0.276649  | NA        | SHC2, ODF3L2, MADCAM1, C19orf20, CDC34, GZMM, BSG, HCN2, POLRMT, FGF22, RNF126, FSTL3, PRSSL1, PALM, C19orf21, PTBP1, LPPR3, AZU1, PRTN3, ELANE, CFD, MED16, C19orf22, KISS1R, ARID3A, WDR18, GRIN3B, C19orf6, CNN2, ABCA7, HMHA1, POLR2E, GPX4, SBNO2, STK11, C19orf26, ATP5D, MIDN, C19orf23, CIRBP, C19orf24, EFNA2, MUM1, NDUFS7, GAMT, DAZAP1, RPS15, APC2, C19orf25, PCSK4, REEP6, ADAMTSL5, PLK5P, MEX3D, MBD3, UQCR11, TCF3, ONECUT3, ATP8B3, REXO1, MIR1909, KLF16, FAM108A1, SCAMP4, ADAT3, CSNK1G2, C19orf34, BTBD2, MKNK2, MOBKL2A, C19orf36, AP3D1, DOT1L, PLEKHJ1, MIR1227, SF3A2, AMH, JSRP1, OAZ1, C19orf35, LINGO3, LSM7, SPPL2B, TMPPRS59, TIMM13, LMNB2, GADD45B, GNG7, DIRAS1, SLC39A3, SGTA, THOP1, ZNF554, ZNF555, ZNF556, ZNF57, ZNF77, TLE6, TLE2, AES, GNA11, GNA15, S1PR4, NCLN, CELF5, NFIC, C19orf77, DOHH, FZR1, C19orf28, C19orf71, HMG20B, GIPC3, TBXA2R, C19orf29, PIP5K1C, TJP3, APBA3, MRPL54, RAX2, MATK, ZFR2, ATCAY, ITGB1BP3, DAPK3, MIR637, EEF2, SNORD37, PIAS4, ZBTB7A, MAP2K2, CREB3L3, SIRT6, ANKRD24, EBI3, CCDC94, SHD, TMIGD2, FSD1, STAP2, MPND, SH3GL1, CHAF1A, UBXN6, HDGFRP2, PLIN4, PLIN5, LRG1, SEMA6B, TNFAIP8L1, C19orf10, DPP9, C19orf30, MIR7-3, FEM1A, TICAM1, PLIN3, ARRD5, UHRF1, KDM4B, PTPRS, ZNRF4, PLAC2, SAFB2, SAFB, C19orf70, HSD11B1L, RPL36, LONP1, TMEM146, PRR22, DUS3L, NRTN, FUT6, FUT3, FUT5, NDUFA11, VMAC, CAPS, RANBP3, RFX2, ACSBG2, MLLT1, ACER1, CLPP, ALKBH7, PSPN, GTF2F1, KHSRP, SLC25A41, SLC25A23, CRB3, |
| Amplification | chr19 | p13.12         | 14,444,753 | 14,454,959 | 7    | 1.007032  | 1.48E-11  | PTGER1, GIPC1                                                                                                                                                                                                                                                                                                                                                                                                                                                                                                                                                                                                                                                                                                                                                                                                                                                                                                                                                                                                                                                                                                                                                                                                                                                                                                                                                                                                                                                                                |
| Deletion      | chr19 | q13.33         | 56,825,794 | 56,840,401 | 8    | -3.845895 | 8.54E-83  | SIGLEC14                                                                                                                                                                                                                                                                                                                                                                                                                                                                                                                                                                                                                                                                                                                                                                                                                                                                                                                                                                                                                                                                                                                                                                                                                                                                                                                                                                                                                                                                                     |
| Deletion      | chr20 | p13            | 1,511,632  | 1,532,485  | 10   | -2.807056 | 1.42E-74  | SIRPB1                                                                                                                                                                                                                                                                                                                                                                                                                                                                                                                                                                                                                                                                                                                                                                                                                                                                                                                                                                                                                                                                                                                                                                                                                                                                                                                                                                                                                                                                                       |
| Deletion      | chr20 | q11.23         | 36,536,123 | 36,546,515 | 6    | -0.718292 | 2.54E-11  | RALGAPB                                                                                                                                                                                                                                                                                                                                                                                                                                                                                                                                                                                                                                                                                                                                                                                                                                                                                                                                                                                                                                                                                                                                                                                                                                                                                                                                                                                                                                                                                      |
| Amplification | chr20 | q13.33         | 59,002,447 | 59,025,401 | 10   | 0.860508  | 1.03E-15  |                                                                                                                                                                                                                                                                                                                                                                                                                                                                                                                                                                                                                                                                                                                                                                                                                                                                                                                                                                                                                                                                                                                                                                                                                                                                                                                                                                                                                                                                                              |
| Amplification | chr21 | p11.2          | 9,882,922  | 9,965,931  | 5    | 1.071656  | 8.12E-17  | TPTE                                                                                                                                                                                                                                                                                                                                                                                                                                                                                                                                                                                                                                                                                                                                                                                                                                                                                                                                                                                                                                                                                                                                                                                                                                                                                                                                                                                                                                                                                         |
| Deletion      | chr21 | q21.1          | 22,577,751 | 22,585,099 | 3    | -1.197483 | 1.74E-11  |                                                                                                                                                                                                                                                                                                                                                                                                                                                                                                                                                                                                                                                                                                                                                                                                                                                                                                                                                                                                                                                                                                                                                                                                                                                                                                                                                                                                                                                                                              |
| Amplification | chr22 | q11.22         | 20,729,331 | 21,369,571 | 278  | 0.836059  | 1.04E-295 | VPREB1, LOC96610, ZNF280B, ZNF280A, PRAME, LOC648691, POM121L1P, GGTL2C                                                                                                                                                                                                                                                                                                                                                                                                                                                                                                                                                                                                                                                                                                                                                                                                                                                                                                                                                                                                                                                                                                                                                                                                                                                                                                                                                                                                                      |
| Amplification | chr22 | q11.22         | 21,371,845 | 21,576,911 | 125  | 2.703152  | NA        | MIR650, IGLL5                                                                                                                                                                                                                                                                                                                                                                                                                                                                                                                                                                                                                                                                                                                                                                                                                                                                                                                                                                                                                                                                                                                                                                                                                                                                                                                                                                                                                                                                                |
| Deletion      | chr22 | q11.23         | 22,677,959 | 22,725,353 | 22   | -3.088192 | 5.77E-286 | LOC391322, GSTT1, GSTTP2                                                                                                                                                                                                                                                                                                                                                                                                                                                                                                                                                                                                                                                                                                                                                                                                                                                                                                                                                                                                                                                                                                                                                                                                                                                                                                                                                                                                                                                                     |
| Deletion      | chr22 | q11.23         | 22,704,683 | 22,708,068 | 3    | -6.109257 | 1.88E-16  | GSTT1                                                                                                                                                                                                                                                                                                                                                                                                                                                                                                                                                                                                                                                                                                                                                                                                                                                                                                                                                                                                                                                                                                                                                                                                                                                                                                                                                                                                                                                                                        |
| Deletion      | chr22 | q13.1          | 37,689,058 | 37,709,359 | 14   | -0.575898 | 6.24E-23  | APOBEC3A, APOBEC3B                                                                                                                                                                                                                                                                                                                                                                                                                                                                                                                                                                                                                                                                                                                                                                                                                                                                                                                                                                                                                                                                                                                                                                                                                                                                                                                                                                                                                                                                           |
| Amplification | chr22 | q13.2          | 41,226,643 | 41,279,529 | 11   | 1.271415  | 3.22E-34  | SERHL, RRP7A                                                                                                                                                                                                                                                                                                                                                                                                                                                                                                                                                                                                                                                                                                                                                                                                                                                                                                                                                                                                                                                                                                                                                                                                                                                                                                                                                                                                                                                                                 |
