# Supplementary material
Source: PubMed Central journal article supplement (PMC4217424)
Supplement: pnas.1417322111.sd02.pdf [file pnas.1417322111.sd02.pdf]

## MM II:6

| Type          | Chr  | Cytoband | Start       | Stop        | #Probes | Amplification/Deletion Score | pval      | Gene Names                                       |
|---------------|------|----------|-------------|-------------|---------|------------------------------|-----------|--------------------------------------------------|
| Amplification | chr1 | p36.13   | 17,080,364  | 17,148,651  | 13      | 0.721871                     | 3.46E-24  | CROCC                                            |
| Amplification | chr1 | p34.3    | 37,692,387  | 37,696,262  | 3       | 1.04455                      | 1.72E-13  |                                                  |
| Amplification | chr1 | p31.1    | 72,539,143  | 72,550,307  | 6       | 3.840889                     | 1.74E-64  |                                                  |
| Amplification | chr1 | q21.3    | 150,836,481 | 150,851,498 | 10      | 2.463029                     | 1.06E-77  | LCE3C                                            |
| Amplification | chr1 | q21.3    | 151,028,700 | 151,036,494 | 4       | 0.84902                      | 4.00E-12  | LCE1D                                            |
| Deletion      | chr1 | q24.2    | 167,493,768 | 167,523,199 | 10      | -0.909799                    | 1.88E-25  | NME7                                             |
| Amplification | chr1 | q25.2    | 177,595,302 | 177,599,656 | 4       | 0.816179                     | 2.52E-10  |                                                  |
| Amplification | chr1 | q42.13   | 227,879,152 | 227,882,854 | 4       | 0.996608                     | 3.28E-15  |                                                  |
| Amplification | chr1 | q42.3    | 234,327,644 | 234,332,114 | 3       | 0.918029                     | 1.53E-10  |                                                  |
| Amplification | chr1 | q44      | 246,811,355 | 246,860,610 | 23      | 0.889273                     | 6.65E-59  | OR2T10, OR2T11                                   |
| Amplification | chr2 | p22.3    | 34,552,935  | 34,590,056  | 17      | 3.307612                     | 1.95E-159 |                                                  |
| Amplification | chr2 | p22.1    | 41,092,989  | 41,101,699  | 5       | 1.019689                     | 1.10E-15  |                                                  |
| Deletion      | chr2 | p16.3    | 52,111,476  | 52,141,375  | 10      | -0.818872                    | 2.73E-29  |                                                  |
| Amplification | chr2 | p16.3    | 52,604,016  | 52,635,754  | 5       | 4.616488                     | 1.17E-94  |                                                  |
| Amplification | chr2 | p11.2    | 88,967,005  | 88,977,899  | 6       | 1.056926                     | 7.80E-23  |                                                  |
| Deletion      | chr2 | q22.3    | 146,582,195 | 146,592,834 | 4       | -3.99286                     | 1.29E-55  |                                                  |
| Amplification | chr2 | q24.1    | 155,527,714 | 155,535,770 | 3       | 0.958269                     | 8.11E-11  |                                                  |
| Deletion      | chr3 | p21.31   | 47,209,546  | 47,227,006  | 6       | -0.862881                    | 7.56E-16  | FLJ39534                                         |
| Deletion      | chr3 | q13.31   | 116,140,997 | 116,147,005 | 4       | -1.082662                    | 5.46E-16  | ZBTB20                                           |
| Deletion      | chr3 | q28      | 190,847,899 | 190,850,621 | 3       | -1.056001                    | 1.37E-12  | TP63                                             |
| Deletion      | chr3 | q29      | 196,943,380 | 196,952,558 | 5       | -0.735036                    | 1.17E-10  | MUC20                                            |
| Deletion      | chr3 | q29      | 197,258,932 | 197,264,736 | 3       | -1.180223                    | 3.38E-14  | TFRC                                             |
| Deletion      | chr4 | p16.1    | 9,821,327   | 9,842,703   | 4       | -5.739363                    | 5.36E-49  |                                                  |
| Amplification | chr4 | p15.1    | 34,457,648  | 34,491,174  | 6       | 1.086767                     | 3.35E-23  |                                                  |
| Deletion      | chr4 | q13.2    | 69,069,651  | 69,165,872  | 14      | -3.103815                    | 2.40E-123 | UGT2B17                                          |
| Deletion      | chr4 | q13.2    | 69,139,037  | 69,165,872  | 6       | -4.790412                    | 1.56E-11  |                                                  |
| Amplification | chr4 | q21.1    | 78,495,363  | 78,506,379  | 7       | 1.069684                     | 8.92E-29  |                                                  |
| Deletion      | chr4 | q26      | 119,345,371 | 119,348,888 | 3       | -0.991226                    | 2.26E-10  | NDST3                                            |
| Deletion      | chr5 | q13.3    | 75,647,535  | 75,696,084  | 19      | -0.506729                    | 4.72E-19  | SV2C                                             |
| Amplification | chr5 | q31.2    | 137,836,466 | 137,843,368 | 4       | 0.984153                     | 8.50E-14  |                                                  |
| Deletion      | chr5 | q31.3    | 140,535,820 | 140,541,237 | 3       | -1.011455                    | 3.62E-11  | PCDH7, PCDH8, PCDH16                             |
| Amplification | chr5 | q33.1    | 147,622,818 | 147,663,987 | 18      | 0.632959                     | 3.40E-25  | SPINK13                                          |
| Deletion      | chr5 | q33.2    | 155,411,053 | 155,421,502 | 5       | -1.028208                    | 1.06E-19  |                                                  |
| Deletion      | chr5 | q35.3    | 180,342,860 | 180,359,036 | 9       | -0.861632                    | 9.34E-24  | BTNL3                                            |
| Amplification | chr6 | p25.3    | 181,361     | 326,382     | 67      | 0.393399                     | 3.23E-33  | DUSP22                                           |
| Deletion      | chr6 | p21.33   | 30,026,699  | 30,040,976  | 6       | -0.697733                    | 7.93E-11  |                                                  |
| Deletion      | chr6 | p21.33   | 31,387,708  | 31,395,376  | 5       | -0.913309                    | 3.32E-15  |                                                  |
| Deletion      | chr6 | p21.32   | 32,563,252  | 32,790,258  | 76      | -0.407974                    | 5.83E-38  | HLA-DRB5, HLA-DRB6, HLA-DRB1, HLA-DQA1, HLA-DQB1 |
| Deletion      | chr6 | p21.32   | 32,567,462  | 32,595,455  | 5       | -3.161124                    | 8.91E-29  | HLA-DRB5                                         |
| Deletion      | chr6 | p21.32   | 32,716,255  | 32,721,931  | 4       | -1.556314                    | 5.07E-13  | HLA-DQA1                                         |

|               |       |                 |             |             |    |           |           |                                                                                                                                                                                                                                        |
|---------------|-------|-----------------|-------------|-------------|----|-----------|-----------|----------------------------------------------------------------------------------------------------------------------------------------------------------------------------------------------------------------------------------------|
| Deletion      | chr6  | p21.32          | 32,756,637  | 32,762,120  | 4  | -1.464043 | 1.86E-13  |                                                                                                                                                                                                                                        |
| Amplification | chr6  | p12.1           | 54,037,199  | 54,042,793  | 3  | 2.957041  | 6.91E-28  | C6orf142                                                                                                                                                                                                                               |
| Amplification | chr6  | p12.1           | 55,934,816  | 55,950,557  | 5  | 1.071583  | 2.12E-17  |                                                                                                                                                                                                                                        |
| Amplification | chr6  | q14.1           | 79,024,557  | 79,091,909  | 13 | 1.10367   | 1.32E-54  |                                                                                                                                                                                                                                        |
| Deletion      | chr6  | q16.3           | 103,845,083 | 103,868,213 | 4  | -4.393168 | 2.20E-35  |                                                                                                                                                                                                                                        |
| Amplification | chr6  | q21             | 112,651,175 | 112,743,099 | 39 | 0.653627  | 3.99E-55  | LAMA4                                                                                                                                                                                                                                  |
| Amplification | chr6  | q23.2           | 132,749,309 | 132,752,540 | 3  | 0.961808  | 3.09E-11  | MOXD1                                                                                                                                                                                                                                  |
| Deletion      | chr6  | q23.2           | 134,631,701 | 134,635,838 | 4  | -4.484849 | 3.17E-61  | SGK1                                                                                                                                                                                                                                   |
| Amplification | chr6  | q25.2           | 155,160,734 | 155,163,954 | 3  | 1.021715  | 1.69E-12  | RBM16                                                                                                                                                                                                                                  |
| Amplification | chr6  | q27             | 165,645,537 | 165,650,669 | 4  | 3.367944  | 1.05E-57  |                                                                                                                                                                                                                                        |
| Deletion      | chr7  | p22.3           | 246,786     | 254,401     | 5  | -0.877018 | 9.91E-15  |                                                                                                                                                                                                                                        |
| Deletion      | chr7  | p21.3           | 11,740,559  | 11,743,822  | 3  | -1.067534 | 4.33E-12  | THSD7A                                                                                                                                                                                                                                 |
| Deletion      | chr7  | p14.3           | 32,948,381  | 32,949,637  | 3  | -1.127962 | 1.24E-12  | RP9P                                                                                                                                                                                                                                   |
| Deletion      | chr7  | p14.1           | 38,262,701  | 38,341,298  | 41 | -0.422412 | 7.83E-32  | TARP                                                                                                                                                                                                                                   |
| Deletion      | chr7  | q22.1           | 100,166,257 | 100,175,050 | 4  | -0.86695  | 2.01E-12  | ZAN                                                                                                                                                                                                                                    |
| Amplification | chr7  | q31.1           | 109,230,336 | 109,240,269 | 5  | 0.855225  | 1.22E-12  |                                                                                                                                                                                                                                        |
| Deletion      | chr7  | q31.31          | 118,618,468 | 118,620,934 | 3  | -5.213254 | 1.24E-43  |                                                                                                                                                                                                                                        |
| Deletion      | chr7  | q33             | 133,436,265 | 133,448,336 | 8  | -0.906375 | 2.04E-24  |                                                                                                                                                                                                                                        |
| Deletion      | chr7  | q34             | 141,414,719 | 141,440,243 | 13 | -0.766871 | 5.46E-26  | MGAM                                                                                                                                                                                                                                   |
| Deletion      | chr7  | q34             | 141,698,634 | 141,714,227 | 10 | -0.927395 | 1.52E-29  |                                                                                                                                                                                                                                        |
| Amplification | chr8  | p23.1           | 7,156,900   | 7,824,118   | 10 | 0.931384  | 8.18E-29  | FAM66B, DEFB109P1B, ZNF705G, DEFB103A, DEFB103B, SPAG11B, DEFB104A, DEFB104B, DEFB106A, DEFB106B, DEFB105A, DEFB105B, DEFB107A, DEFB107B, FAM90A7, FAM90A14, FAM90A13, FAM90A19, FAM90A18, FAM90A8, FAM90A9, FAM90A10, SPAG11A, DEFB4A |
| Amplification | chr8  | p21.2           | 25,030,003  | 25,039,429  | 3  | 1.218761  | 5.71E-16  |                                                                                                                                                                                                                                        |
| Amplification | chr8  | p11.23 - p11.22 | 39,352,361  | 39,505,315  | 59 | 2.763821  | NA        | ADAM5P, ADAM3A                                                                                                                                                                                                                         |
| Amplification | chr8  | p11.23          | 39,392,694  | 39,394,580  | 3  | 0.931018  | 7.04E-21  |                                                                                                                                                                                                                                        |
| Amplification | chr8  | q11.22          | 51,193,977  | 51,200,350  | 4  | 1.008438  | 2.23E-15  | SNTG1                                                                                                                                                                                                                                  |
| Deletion      | chr8  | q21.3           | 87,255,865  | 87,265,494  | 5  | -0.784416 | 1.60E-11  |                                                                                                                                                                                                                                        |
| Amplification | chr9  | p24.1           | 6,692,831   | 6,698,349   | 3  | 1.173688  | 1.06E-12  |                                                                                                                                                                                                                                        |
| Amplification | chr10 | p15.3           | 766,548     | 774,905     | 3  | 1.40228   | 3.58E-21  |                                                                                                                                                                                                                                        |
| Amplification | chr10 | p11.23          | 31,287,101  | 31,291,584  | 3  | 4.819448  | 2.18E-58  | ZNF438                                                                                                                                                                                                                                 |
| Deletion      | chr10 | q11.21          | 44,053,562  | 44,071,012  | 3  | -0.874868 | 1.92E-10  |                                                                                                                                                                                                                                        |
| Deletion      | chr10 | q26.3           | 135,102,317 | 135,227,522 | 44 | -0.844909 | 3.38E-101 | LOC619207, CYP2E1, SYCE1                                                                                                                                                                                                               |
| Amplification | chr11 | p15.5           | 1,104,014   | 1,105,396   | 3  | 1.280685  | 1.97E-15  |                                                                                                                                                                                                                                        |
| Deletion      | chr11 | p15.4           | 4,926,583   | 4,932,273   | 5  | -0.946205 | 6.86E-17  |                                                                                                                                                                                                                                        |
| Deletion      | chr11 | p15.4           | 5,742,476   | 5,765,497   | 15 | -1.039382 | 1.78E-53  | OR52N5                                                                                                                                                                                                                                 |
| Deletion      | chr11 | q12.3           | 61,976,619  | 61,984,707  | 5  | -0.888736 | 3.52E-15  | AHNAK                                                                                                                                                                                                                                  |
| Amplification | chr11 | q22.1           | 98,271,459  | 98,311,618  | 19 | 0.969973  | 2.22E-50  |                                                                                                                                                                                                                                        |
| Deletion      | chr11 | q22.3           | 106,744,337 | 106,747,979 | 4  | -1.036314 | 6.42E-18  | CWF19L2                                                                                                                                                                                                                                |
| Amplification | chr12 | p13.2           | 10,470,425  | 10,485,907  | 7  | 0.718149  | 8.73E-13  | KLRC2                                                                                                                                                                                                                                  |
| Amplification | chr12 | p13.2           | 11,104,973  | 11,140,477  | 12 | 0.609727  | 5.22E-15  | PRR4, PRH1, TAS2R46, TAS2R43                                                                                                                                                                                                           |

|               |       |               |             |             |     |           |           |                                                                                                       |
|---------------|-------|---------------|-------------|-------------|-----|-----------|-----------|-------------------------------------------------------------------------------------------------------|
| Amplification | chr12 | q24.31        | 123,370,406 | 123,374,950 | 3   | 1.216076  | 6.66E-17  | NCOR2                                                                                                 |
| Amplification | chr13 | q12.11        | 18,464,409  | 18,468,083  | 4   | 0.793632  | 5.76E-11  |                                                                                                       |
| Deletion      | chr13 | q21.1         | 56,657,371  | 56,686,922  | 16  | -1.012297 | 1.05E-60  |                                                                                                       |
| Amplification | chr13 | q21.33        | 71,705,959  | 71,730,915  | 5   | 0.797356  | 1.09E-11  |                                                                                                       |
| Deletion      | chr14 | q11.2         | 19,271,102  | 19,497,082  | 53  | -0.539427 | 1.96E-54  | OR4Q3, OR4M1, OR4N2, OR4K2, OR4K5, OR4K1                                                              |
| Deletion      | chr14 | q11.2         | 21,462,313  | 22,089,626  | 311 | -0.328416 | 3.68E-117 |                                                                                                       |
| Deletion      | chr14 | q21.3         | 43,571,616  | 43,597,724  | 5   | -1.007448 | 6.79E-20  |                                                                                                       |
| Amplification | chr14 | q31.1         | 79,176,037  | 79,183,213  | 4   | 1.133574  | 2.55E-14  | NRXN3                                                                                                 |
| Amplification | chr14 | q32.33        | 105,403,001 | 105,425,486 | 8   | 4.161827  | 1.41E-129 |                                                                                                       |
| Amplification | chr14 | q32.33        | 105,432,521 | 105,474,067 | 10  | 0.886662  | 2.23E-26  | KIAA0125                                                                                              |
| Deletion      | chr14 | q32.33        | 106,223,137 | 106,253,703 | 14  | -0.555091 | 1.99E-17  |                                                                                                       |
| Amplification | chr15 | q11.2         | 18,692,865  | 20,079,994  | 150 | 0.396871  | 2.40E-41  | GOLGA6L6, GOLGA8C, BCL8, LOC646214, CXADRP2, POTE8, NF1P1, LOC727924, OR4M2, OR4N4, OR4N3P, LOC646396 |
| Deletion      | chr15 | q11.2         | 19,833,542  | 19,844,276  | 4   | -0.580617 | 9.47E-13  | LOC727924                                                                                             |
| Amplification | chr15 | q24.3         | 74,671,626  | 74,680,498  | 4   | 3.329915  | 5.57E-59  | SCAPER                                                                                                |
| Amplification | chr15 | q25.2         | 81,095,411  | 81,253,557  | 74  | 0.918319  | 5.98E-207 | CPEB1, AP3B2, SCARNA15, FSD2                                                                          |
| Amplification | chr16 | p11.2         | 32,379,126  | 33,559,266  | 46  | 0.42575   | 7.41E-32  | TP53TG3B, TP53TG3, SLC6A10P, LOC390705                                                                |
| Deletion      | chr16 | q12.2         | 54,353,978  | 54,379,898  | 10  | -1.652078 | 3.88E-54  | CES4                                                                                                  |
| Deletion      | chr16 | q12.2         | 54,353,978  | 54,362,168  | 3   | -4.106448 | 1.89E-16  | CES4                                                                                                  |
| Deletion      | chr16 | q12.2         | 54,363,713  | 54,368,776  | 4   | -0.759221 | 3.86E-11  | CES4                                                                                                  |
| Amplification | chr16 | q12.2         | 54,399,890  | 54,408,498  | 5   | 1.094249  | 1.58E-23  | CES1                                                                                                  |
| Amplification | chr17 | p11.2         | 21,119,904  | 21,195,649  | 31  | 0.452367  | 7.10E-25  | MAP2K3                                                                                                |
| Amplification | chr17 | q12           | 31,461,588  | 31,503,833  | 19  | 0.909069  | 1.05E-57  |                                                                                                       |
| Deletion      | chr17 | q21.31        | 41,521,544  | 41,710,444  | 67  | -0.965525 | 1.69E-220 | KIAA1267                                                                                              |
| Deletion      | chr19 | p13.3         | 955,217     | 982,272     | 12  | -0.514502 | 9.66E-12  | GRIN3B, C19orf6, CNN2                                                                                 |
| Amplification | chr19 | p12           | 20,399,700  | 20,507,294  | 17  | 0.651726  | 1.01E-22  |                                                                                                       |
| Amplification | chr19 | q13.12        | 41,815,501  | 42,052,486  | 105 | 0.938645  | 1.56E-304 | ZNF461, ZNF567, ZNF790, ZNF345                                                                        |
| Amplification | chr19 | q13.33        | 56,825,794  | 56,840,401  | 8   | 3.257031  | 1.75E-72  | SIGLEC14                                                                                              |
| Amplification | chr19 | q13.42        | 59,249,279  | 59,251,879  | 3   | 1.363466  | 1.59E-19  | VSTM1                                                                                                 |
| Deletion      | chr20 | p13           | 1,511,632   | 1,532,485   | 10  | -2.940839 | 8.71E-96  | SIRPB1                                                                                                |
| Deletion      | chr20 | p13           | 1,518,825   | 1,525,359   | 4   | -4.973849 | 1.94E-12  | SIRPB1                                                                                                |
| Amplification | chr21 | p11.2 - p11.1 | 9,882,922   | 10,022,365  | 10  | 1.070129  | 2.99E-42  | TPTE                                                                                                  |
| Deletion      | chr22 | q11.23        | 22,677,959  | 22,720,254  | 20  | -2.65002  | 5.68E-152 | LOC391322, GSTT1, GSTTP2                                                                              |
| Deletion      | chr22 | q11.23        | 22,686,690  | 22,696,215  | 4   | -1.343141 | 5.94E-16  |                                                                                                       |
| Deletion      | chr22 | q11.23        | 22,704,683  | 22,712,266  | 5   | -4.644047 | 1.41E-13  | GSTT1                                                                                                 |
| Deletion      | chr22 | q11.23        | 22,714,979  | 22,720,254  | 4   | -4.379548 | 1.91E-10  | GSTTP2                                                                                                |
| Deletion      | chr22 | q13.1         | 37,689,058  | 37,715,431  | 16  | -0.819094 | 2.33E-37  | APOBEC3A, APOBEC3B                                                                                    |
| Amplification | chr22 | q13.33        | 48,451,678  | 48,455,551  | 3   | 1.550912  | 1.24E-20  |                                                                                                       |

## MM II:7

| Type          | Chr  | Cytoband      | Start       | Stop        | #Probes | Amplification/Deletion Score | pval      | Gene Names                  |
|---------------|------|---------------|-------------|-------------|---------|------------------------------|-----------|-----------------------------|
| Amplification | chr1 | p36.33        | 1,053,033   | 1,057,176   | 3       | 1.045852                     | 1.67E-10  |                             |
| Deletion      | chr1 | p36.22        | 10,558,863  | 10,577,550  | 8       | -0.734443                    | 5.63E-12  | PEX14                       |
| Amplification | chr1 | p36.11        | 25,482,036  | 25,568,339  | 16      | 0.5922                       | 9.87E-17  | RHD, TMEM50A, RHCE          |
| Amplification | chr1 | p34.3         | 34,876,833  | 34,883,434  | 4       | 1.173391                     | 1.86E-16  |                             |
| Deletion      | chr1 | q21.3         | 150,823,073 | 150,851,498 | 11      | -2.494915                    | 2.10E-78  | LCE3C                       |
| Amplification | chr1 | q21.3         | 151,028,700 | 151,036,494 | 4       | 3.126804                     | 4.20E-50  | LCE1D                       |
| Amplification | chr1 | q31.1         | 187,967,601 | 188,046,820 | 14      | 0.931922                     | 1.31E-29  |                             |
| Amplification | chr1 | q42.13        | 227,879,152 | 227,882,854 | 4       | 2.995941                     | 3.78E-35  |                             |
| Deletion      | chr1 | q44           | 246,668,425 | 246,713,399 | 13      | -0.505802                    | 1.24E-10  | OR2T2, OR2T3                |
| Amplification | chr1 | q44           | 246,811,355 | 246,860,610 | 23      | 3.439649                     | 1.64E-283 | OR2T10, OR2T11              |
| Amplification | chr2 | p25.3         | 3,713,664   | 3,714,291   | 3       | 1.11885                      | 7.06E-10  | ALLC                        |
| Amplification | chr2 | p22.3         | 34,551,222  | 34,590,056  | 18      | 0.948078                     | 6.58E-35  |                             |
| Amplification | chr2 | p22.3         | 35,821,494  | 35,844,943  | 3       | 2.043764                     | 3.36E-19  |                             |
| Amplification | chr2 | p16.3         | 52,604,016  | 52,635,754  | 5       | 3.493886                     | 1.88E-67  |                             |
| Amplification | chr2 | p11.2         | 88,914,081  | 88,941,307  | 14      | 3.047522                     | 4.98E-49  |                             |
| Amplification | chr2 | p11.2         | 88,914,081  | 89,231,798  | 70      | 1.299825                     | 1.80E-241 |                             |
| Amplification | chr2 | p11.2         | 88,967,005  | 88,977,899  | 6       | 3.738109                     | 2.21E-36  |                             |
| Amplification | chr2 | p11.2         | 88,984,458  | 89,231,798  | 35      | 0.892374                     | 4.32E-16  |                             |
| Amplification | chr2 | q22.3         | 146,582,195 | 146,592,834 | 4       | 4.296261                     | 1.47E-73  |                             |
| Deletion      | chr2 | q23.3         | 153,167,113 | 153,169,715 | 3       | -0.987488                    | 3.37E-10  | FMNL2                       |
| Amplification | chr2 | q24.1         | 155,527,714 | 155,535,770 | 3       | 1.18714                      | 3.08E-12  |                             |
| Deletion      | chr2 | q31.2         | 179,565,415 | 179,594,654 | 10      | -0.956883                    | 7.94E-25  | CCDC141                     |
| Deletion      | chr2 | q37.3         | 239,162,831 | 239,168,656 | 3       | -1.072862                    | 4.02E-11  |                             |
| Deletion      | chr3 | q26.1         | 163,997,228 | 164,108,010 | 28      | -3.62679                     | 1.02E-207 |                             |
| Deletion      | chr3 | q26.31        | 172,545,244 | 172,549,342 | 4       | -0.977678                    | 3.77E-10  | TNIK                        |
| Deletion      | chr3 | q26.31        | 176,018,416 | 176,033,751 | 4       | -1.107161                    | 4.22E-10  |                             |
| Deletion      | chr3 | q29           | 194,358,882 | 194,362,331 | 3       | -3.857887                    | 2.84E-18  |                             |
| Amplification | chr3 | q29           | 196,822,133 | 197,005,468 | 49      | 0.386859                     | 1.10E-20  | SDHAP2, MIR570, MUC20, MUC4 |
| Amplification | chr4 | p15.1         | 34,457,648  | 34,491,174  | 6       | 3.620031                     | 2.08E-82  |                             |
| Deletion      | chr4 | q24           | 107,276,428 | 107,283,316 | 5       | -0.962696                    | 3.75E-13  | TBCK                        |
| Amplification | chr4 | q28.3         | 139,177,303 | 139,257,357 | 23      | 0.54404                      | 1.03E-17  |                             |
| Amplification | chr4 | q32.1         | 161,268,543 | 161,302,670 | 4       | 1.051852                     | 1.01E-10  |                             |
| Amplification | chr4 | q35.2         | 190,730,982 | 190,928,028 | 65      | 0.372856                     | 1.00E-21  |                             |
| Deletion      | chr5 | q15           | 95,563,307  | 95,589,865  | 9       | -0.640482                    | 1.49E-10  |                             |
| Amplification | chr5 | q21.2 - q21.3 | 104,461,541 | 104,528,503 | 12      | 1.116253                     | 2.11E-41  | RAB9BP1                     |
| Deletion      | chr5 | q33.1         | 150,185,190 | 150,202,660 | 7       | -3.779227                    | 2.45E-85  |                             |
| Deletion      | chr6 | p21.33        | 29,962,849  | 30,005,390  | 14      | -0.922715                    | 6.80E-30  | HLA-H, HCG2P7, HCG4P6       |
| Amplification | chr6 | p21.32        | 32,558,677  | 32,609,584  | 12      | 1.308288                     | 4.51E-20  | HLA-DRB5                    |
| Deletion      | chr6 | p21.32        | 32,629,848  | 32,633,740  | 3       | -1.753323                    | 4.43E-12  | HLA-DRB6                    |
| Deletion      | chr6 | p21.32        | 32,716,255  | 32,728,546  | 8       | -1.641925                    | 4.05E-34  | HLA-DQA1                    |

|               |       |                 |             |             |    |           |           |                                            |
|---------------|-------|-----------------|-------------|-------------|----|-----------|-----------|--------------------------------------------|
| Deletion      | chr6  | p21.32          | 32,756,637  | 32,762,120  | 4  | -1.443385 | 1.70E-20  |                                            |
| Amplification | chr6  | p12.1           | 54,037,199  | 54,042,793  | 3  | 4.294625  | 1.62E-48  | C6orf142                                   |
| Amplification | chr6  | p12.1           | 55,934,816  | 55,946,682  | 4  | 1.174672  | 1.73E-16  |                                            |
| Deletion      | chr6  | q14.1           | 77,499,382  | 77,510,042  | 3  | -1.230609 | 2.04E-14  |                                            |
| Amplification | chr6  | q14.1           | 79,024,557  | 79,091,909  | 13 | 1.08965   | 1.34E-40  |                                            |
| Deletion      | chr6  | q23.2           | 134,631,701 | 134,635,838 | 4  | -1.018136 | 5.15E-12  | SGK1                                       |
| Amplification | chr6  | q27             | 165,645,537 | 165,650,669 | 4  | 4.277235  | 6.90E-66  |                                            |
| Amplification | chr7  | p22.3           | 1,037,402   | 1,047,766   | 4  | 1.664016  | 1.08E-29  | C7orf50                                    |
| Deletion      | chr7  | p14.1           | 38,270,942  | 38,320,676  | 27 | -0.502958 | 3.66E-21  | TARP                                       |
| Amplification | chr7  | q22.3           | 106,692,806 | 106,734,547 | 18 | 0.641725  | 1.27E-19  | COG5                                       |
| Deletion      | chr7  | q31.1           | 109,230,336 | 109,240,269 | 5  | -0.978048 | 3.86E-13  |                                            |
| Amplification | chr7  | q34             | 141,413,352 | 141,438,563 | 13 | 1.216298  | 4.14E-46  | MGAM                                       |
| Deletion      | chr7  | q34             | 141,698,634 | 141,714,227 | 10 | -3.50243  | 3.60E-87  |                                            |
| Deletion      | chr7  | q34             | 142,135,117 | 142,166,758 | 10 | -0.85669  | 3.65E-19  | PRSS1, TRY6                                |
| Deletion      | chr8  | p23.3           | 2,107,880   | 2,132,121   | 8  | -0.800744 | 4.24E-17  |                                            |
| Deletion      | chr8  | p23.1           | 9,535,456   | 9,538,090   | 3  | -1.249192 | 1.36E-12  | TNKS                                       |
| Amplification | chr8  | p21.3           | 22,604,906  | 22,608,955  | 4  | 1.125433  | 5.10E-13  | EGR3                                       |
| Amplification | chr8  | p21.2           | 25,030,003  | 25,039,429  | 3  | 1.223299  | 1.11E-12  |                                            |
| Amplification | chr8  | p11.23 - p11.22 | 39,352,361  | 39,505,315  | 59 | 0.948024  | 5.72E-134 | ADAM5P, ADAM3A                             |
| Amplification | chr8  | p11.21          | 42,712,612  | 42,739,788  | 13 | 0.657444  | 9.41E-17  | CHRNA6                                     |
| Deletion      | chr8  | q21.11          | 74,748,262  | 74,761,603  | 5  | -0.988457 | 1.21E-12  | STAU2                                      |
| Amplification | chr8  | q24.3           | 145,062,148 | 145,093,198 | 14 | 0.52712   | 4.71E-11  | PLEC, MIR661                               |
| Deletion      | chr9  | q31.3           | 111,601,895 | 111,619,187 | 8  | -0.670226 | 5.86E-12  | PALM2, PALM2-AKAP2                         |
| Amplification | chr10 | p15.3           | 675,778     | 685,551     | 5  | 0.885901  | 1.26E-11  | DIP2C                                      |
| Amplification | chr10 | q11.22          | 46,384,985  | 46,568,552  | 72 | 0.408707  | 2.90E-33  | SYT15, GPRIN2, PPYR1, LOC643650, LOC728643 |
| Amplification | chr10 | q11.23          | 52,873,705  | 52,881,742  | 6  | 1.160081  | 2.92E-23  | PRKG1                                      |
| Deletion      | chr10 | q25.2           | 113,201,227 | 113,343,540 | 32 | -0.94216  | 6.97E-73  |                                            |
| Deletion      | chr10 | q26.13          | 124,337,128 | 124,340,415 | 3  | -2.539843 | 2.10E-22  | DMBT1                                      |
| Amplification | chr10 | q26.3           | 134,828,679 | 134,846,206 | 8  | 0.730412  | 2.79E-10  | KNDC1                                      |
| Amplification | chr11 | p15.5           | 420,644     | 424,562     | 4  | 1.044729  | 9.34E-12  | ANO9                                       |
| Amplification | chr11 | p15.5           | 1,717,074   | 1,728,591   | 6  | 0.752163  | 4.28E-10  | MOB2, LOC402778                            |
| Deletion      | chr11 | p15.4           | 7,771,593   | 7,783,551   | 8  | -1.068223 | 1.30E-25  | OR5P2                                      |
| Amplification | chr11 | q13.1           | 65,847,130  | 65,851,999  | 4  | 0.963736  | 1.12E-11  |                                            |
| Deletion      | chr11 | q22.3           | 106,733,851 | 106,747,979 | 5  | -0.793169 | 8.97E-11  | CWF19L2                                    |
| Deletion      | chr11 | q22.3           | 107,289,887 | 107,295,931 | 4  | -1.005095 | 1.64E-12  |                                            |
| Amplification | chr11 | q24.3           | 129,802,472 | 129,806,879 | 4  | 1.166222  | 1.75E-13  | ADAMTS8                                    |
| Amplification | chr12 | p13.31          | 9,528,590   | 9,610,113   | 16 | 1.557619  | 7.95E-75  |                                            |
| Amplification | chr12 | p13.2           | 11,109,483  | 11,147,734  | 13 | 0.791518  | 8.62E-21  | PRR4, PRH1, TAS2R43                        |
| Amplification | chr12 | p13.2           | 11,419,189  | 11,435,698  | 6  | 1.631803  | 8.48E-43  |                                            |
| Amplification | chr12 | p11.21          | 31,169,263  | 31,237,564  | 17 | 0.573744  | 1.08E-16  |                                            |
| Amplification | chr12 | q23.1           | 98,318,378  | 98,320,224  | 3  | 1.068426  | 2.85E-10  | ANKS1B                                     |
| Amplification | chr12 | q24.31          | 123,373,377 | 123,378,308 | 3  | 1.345211  | 3.02E-16  | NCOR2                                      |

|               |       |               |             |             |     |           |           |                                                                                                       |
|---------------|-------|---------------|-------------|-------------|-----|-----------|-----------|-------------------------------------------------------------------------------------------------------|
| Amplification | chr13 | q12.11        | 18,464,409  | 18,469,562  | 5   | 0.814813  | 1.28E-10  |                                                                                                       |
| Deletion      | chr13 | q21.1         | 56,657,371  | 56,686,922  | 16  | -0.84483  | 7.60E-35  |                                                                                                       |
| Amplification | chr14 | q11.1 - q11.2 | 18,864,561  | 19,494,475  | 53  | 0.930433  | 7.81E-120 | POTEM, OR4Q3, OR4M1, OR4N2, OR4K2, OR4K5, OR4K1                                                       |
| Deletion      | chr14 | q11.2         | 21,489,084  | 22,046,156  | 276 | -0.363351 | 1.03E-95  |                                                                                                       |
| Deletion      | chr14 | q21.1         | 40,680,589  | 40,726,989  | 8   | -1.093877 | 4.71E-25  |                                                                                                       |
| Deletion      | chr14 | q24.1         | 69,088,190  | 69,093,503  | 4   | -0.959879 | 3.45E-11  |                                                                                                       |
| Amplification | chr14 | q32.33        | 105,314,254 | 105,441,928 | 43  | 2.318623  | NA        |                                                                                                       |
| Amplification | chr14 | q32.33        | 105,340,830 | 105,354,945 | 8   | 3.548358  | 6.20E-16  |                                                                                                       |
| Amplification | chr14 | q32.33        | 105,397,801 | 105,401,460 | 3   | 0.352444  | 1.46E-32  |                                                                                                       |
| Amplification | chr14 | q32.33        | 105,403,001 | 105,416,455 | 7   | 4.536962  | 1.85E-28  |                                                                                                       |
| Amplification | chr14 | q32.33        | 105,460,029 | 105,881,952 | 103 | 0.565222  | 6.16E-78  | KIAA0125, ADAM6, NCRNA00226                                                                           |
| Amplification | chr14 | q32.33        | 105,856,972 | 105,875,983 | 4   | 2.819805  | 5.17E-30  |                                                                                                       |
| Amplification | chr15 | q11.2         | 18,741,716  | 20,088,315  | 150 | 0.943106  | NA        | GOLGA6L6, GOLGA8C, BCL8, LOC646214, CXADRP2, POTE8, NF1P1, LOC727924, OR4M2, OR4N4, OR4N3P, LOC646396 |
| Amplification | chr15 | q24.3         | 74,671,626  | 74,680,498  | 4   | 2.57188   | 7.49E-35  | SCAPER                                                                                                |
| Amplification | chr16 | p11.2         | 28,523,145  | 28,529,999  | 4   | 1.190372  | 6.98E-17  | SULT1A1                                                                                               |
| Deletion      | chr16 | p11.2 - p11.1 | 34,325,501  | 34,584,850  | 49  | -0.401127 | 3.25E-22  | LOC283914, LOC146481                                                                                  |
| Deletion      | chr17 | q21.31        | 41,521,544  | 41,710,444  | 67  | -0.953421 | 9.54E-161 | KIAA1267                                                                                              |
| Amplification | chr17 | q25.3         | 72,987,846  | 72,995,167  | 4   | 0.949564  | 2.18E-11  | 9-Sep                                                                                                 |
| Amplification | chr19 | p12           | 20,399,700  | 20,507,294  | 17  | 0.784644  | 6.79E-24  |                                                                                                       |
| Deletion      | chr19 | p12           | 21,530,823  | 21,549,686  | 8   | -0.634679 | 2.34E-10  |                                                                                                       |
| Amplification | chr19 | q13.41        | 58,212,113  | 58,244,066  | 15  | 0.561061  | 4.61E-12  |                                                                                                       |
| Deletion      | chr20 | p12.1         | 15,035,037  | 15,069,531  | 20  | -0.844081 | 3.63E-41  | MACROD2                                                                                               |
| Amplification | chr20 | q13.2         | 52,081,719  | 52,090,452  | 5   | 0.918934  | 5.29E-10  | BCAS1                                                                                                 |
| Amplification | chr21 | p11.2 - p11.1 | 9,882,922   | 10,022,365  | 10  | 0.677023  | 5.36E-14  | TPTE                                                                                                  |
| Deletion      | chr21 | q21.3         | 29,087,644  | 29,098,542  | 3   | -1.058895 | 2.64E-10  |                                                                                                       |
| Amplification | chr21 | q22.3         | 45,731,080  | 45,735,117  | 4   | 0.92027   | 3.89E-10  | COL18A1                                                                                               |
| Amplification | chr22 | q11.22        | 20,717,815  | 20,724,808  | 5   | 0.784332  | 5.79E-10  |                                                                                                       |
| Amplification | chr22 | q11.22        | 20,729,331  | 21,576,911  | 403 | 1.158222  | NA        | VPREB1, LOC96610, ZNF280B, ZNF280A, PRAME, LOC648691, POM121L1P, GGTL2, MIR650, IGLL5                 |
| Amplification | chr22 | q11.22        | 20,730,747  | 21,368,161  | 276 | 0.800309  | 1.51E-90  | VPREB1, LOC96610, ZNF280B, ZNF280A, PRAME, LOC648691, POM121L1P, GGTL2                                |
| Amplification | chr22 | q11.22        | 21,371,845  | 21,576,911  | 125 | 2.472753  | NA        | MIR650, IGLL5                                                                                         |
| Amplification | chr22 | q11.22        | 21,404,393  | 21,412,339  | 4   | 1.064339  | 6.98E-18  |                                                                                                       |
| Amplification | chr22 | q11.22        | 21,544,789  | 21,550,084  | 3   | 4.676538  | 3.08E-13  |                                                                                                       |
| Amplification | chr22 | q11.23        | 23,994,618  | 24,249,073  | 91  | 0.541392  | 6.91E-70  | IGLL3, LRP5L, CRYBB2P1                                                                                |
| Deletion      | chr22 | q13.1         | 37,689,058  | 37,721,908  | 18  | -0.834227 | 1.95E-32  | APOBEC3A, APOBEC3B                                                                                    |
| Amplification | chr22 | q13.33        | 48,451,678  | 48,455,551  | 3   | 1.269572  | 3.70E-14  |                                                                                                       |

## MM III:1

| Type          | Chr  | Cytoband | Start       | Stop        | #Probes | Amplification/Deletion Score | pval      | Gene Names                                       |
|---------------|------|----------|-------------|-------------|---------|------------------------------|-----------|--------------------------------------------------|
| Amplification | chr1 | p36.21   | 12,762,774  | 12,840,048  | 8       | 0.517918                     | 9.38E-11  | PRAMEF1, PRAMEF11, LOC649330, HNRNPCL1, PRAMEF2  |
| Amplification | chr1 | p36.13   | 17,080,364  | 17,148,651  | 13      | 0.545403                     | 3.05E-16  | CROCC                                            |
| Amplification | chr1 | p34.3    | 37,692,387  | 37,696,262  | 3       | 1.031916                     | 9.91E-14  |                                                  |
| Deletion      | chr1 | p31.3    | 61,884,298  | 61,890,447  | 4       | -0.797876                    | 1.22E-11  |                                                  |
| Deletion      | chr1 | p13.3    | 108,535,814 | 108,538,721 | 3       | -0.962136                    | 8.95E-12  | SLC25A24                                         |
| Amplification | chr1 | q21.1    | 147,306,304 | 147,644,890 | 37      | 0.654636                     | 3.81E-59  | LOC388692, FCGR1C                                |
| Deletion      | chr1 | q24.2    | 167,493,768 | 167,523,199 | 10      | -0.870425                    | 2.18E-22  | NME7                                             |
| Amplification | chr1 | q25.2    | 177,596,757 | 177,599,656 | 3       | 1.07005                      | 1.47E-12  |                                                  |
| Deletion      | chr1 | q41      | 212,721,604 | 212,737,884 | 10      | -0.601286                    | 1.37E-12  | PTPN14                                           |
| Amplification | chr1 | q44      | 243,240,134 | 243,251,760 | 7       | 0.621299                     | 3.84E-11  | EFCAB2                                           |
| Amplification | chr1 | q44      | 246,794,552 | 246,860,610 | 26      | 0.881133                     | 7.26E-66  | OR2T34, OR2T10, OR2T11                           |
| Amplification | chr2 | p22.3    | 34,552,935  | 34,590,056  | 17      | 3.698907                     | 6.72E-177 |                                                  |
| Deletion      | chr2 | p22.2    | 37,803,744  | 37,854,409  | 23      | -0.499886                    | 8.70E-22  |                                                  |
| Amplification | chr2 | p22.1    | 41,091,579  | 41,101,699  | 6       | 0.796603                     | 2.65E-12  |                                                  |
| Amplification | chr2 | p16.3    | 52,604,016  | 52,635,754  | 5       | 3.342087                     | 5.97E-67  |                                                  |
| Amplification | chr2 | p11.2    | 88,967,005  | 88,975,841  | 5       | 1.073228                     | 3.15E-21  |                                                  |
| Amplification | chr2 | q24.1    | 155,527,714 | 155,535,770 | 3       | 1.071358                     | 4.87E-13  |                                                  |
| Deletion      | chr3 | p12.3    | 77,909,311  | 77,930,214  | 6       | -0.608319                    | 4.85E-11  |                                                  |
| Deletion      | chr3 | q13.31   | 116,140,997 | 116,147,005 | 4       | -0.914637                    | 2.00E-11  | ZBTB20                                           |
| Deletion      | chr3 | q29      | 196,943,380 | 196,952,558 | 5       | -0.883804                    | 3.35E-13  | MUC20                                            |
| Amplification | chr4 | p15.1    | 34,457,648  | 34,491,174  | 6       | 0.966881                     | 5.22E-18  |                                                  |
| Deletion      | chr4 | q13.2    | 69,069,651  | 69,165,872  | 14      | -3.827283                    | 2.86E-133 | UGT2B17                                          |
| Deletion      | chr4 | q24      | 107,276,428 | 107,283,316 | 5       | -0.917597                    | 4.45E-14  | TBCK                                             |
| Amplification | chr4 | q28.3    | 139,177,303 | 139,257,357 | 23      | 0.542329                     | 6.61E-23  |                                                  |
| Amplification | chr5 | p15.33   | 776,194     | 911,883     | 11      | 0.966304                     | 8.37E-31  | ZDHC11                                           |
| Deletion      | chr5 | q13.3    | 75,647,535  | 75,696,084  | 19      | -0.618299                    | 4.39E-27  | SV2C                                             |
| Amplification | chr5 | q31.2    | 137,836,466 | 137,842,166 | 3       | 0.889995                     | 2.14E-11  |                                                  |
| Deletion      | chr5 | q31.3    | 140,535,820 | 140,541,237 | 3       | -1.092946                    | 3.60E-12  | PCDH7, PCDH8, PCDH16                             |
| Deletion      | chr5 | q33.1    | 150,185,190 | 150,202,660 | 7       | -1.127032                    | 9.66E-28  |                                                  |
| Deletion      | chr5 | q35.3    | 180,182,580 | 180,362,394 | 17      | -0.609739                    | 1.64E-22  | LOC729678, ZFP62, BTNL8, BTNL3                   |
| Amplification | chr6 | p25.3    | 202,063     | 326,382     | 61      | 0.413763                     | 2.06E-39  | DUSP22                                           |
| Deletion      | chr6 | p21.33   | 31,383,925  | 31,391,041  | 5       | -0.98849                     | 4.32E-13  |                                                  |
| Deletion      | chr6 | p21.32   | 32,558,677  | 32,787,045  | 76      | -0.557751                    | 3.69E-62  | HLA-DRB5, HLA-DRB6, HLA-DRB1, HLA-DQA1, HLA-DQB1 |
| Deletion      | chr6 | p21.32   | 32,567,462  | 32,595,455  | 5       | -4.225031                    | 6.65E-34  | HLA-DRB5                                         |
| Deletion      | chr6 | p21.32   | 32,629,848  | 32,650,731  | 5       | -2.610354                    | 6.82E-23  | HLA-DRB6                                         |
| Deletion      | chr6 | p21.32   | 32,713,363  | 32,728,546  | 9       | -1.930372                    | 6.33E-28  | HLA-DQA1                                         |
| Deletion      | chr6 | p21.32   | 32,756,637  | 32,762,120  | 4       | -1.933747                    | 1.34E-17  |                                                  |
| Deletion      | chr6 | p21.31   | 35,864,636  | 35,878,715  | 8       | -0.773857                    | 3.90E-14  | CLPS                                             |

|               |       |                 |             |             |    |           |           |                                                                                                                                                                                                           |
|---------------|-------|-----------------|-------------|-------------|----|-----------|-----------|-----------------------------------------------------------------------------------------------------------------------------------------------------------------------------------------------------------|
| Amplification | chr6  | p12.1           | 54,037,199  | 54,042,793  | 3  | 3.130772  | 1.31E-29  | C6orf142                                                                                                                                                                                                  |
| Amplification | chr6  | p12.1           | 55,934,816  | 55,946,682  | 4  | 0.994058  | 6.16E-16  |                                                                                                                                                                                                           |
| Amplification | chr6  | q14.1           | 79,024,557  | 79,091,909  | 13 | 1.025439  | 1.30E-47  |                                                                                                                                                                                                           |
| Amplification | chr6  | q23.2           | 132,749,309 | 132,752,540 | 3  | 0.999727  | 9.61E-13  | MOXD1                                                                                                                                                                                                     |
| Deletion      | chr6  | q23.2           | 134,631,701 | 134,635,838 | 4  | -1.069678 | 2.84E-16  | SGK1                                                                                                                                                                                                      |
| Amplification | chr6  | q25.2           | 155,160,734 | 155,163,954 | 3  | 1.125037  | 1.16E-15  | RBM16                                                                                                                                                                                                     |
| Amplification | chr6  | q27             | 165,645,537 | 165,650,669 | 4  | 3.538634  | 6.58E-60  |                                                                                                                                                                                                           |
| Deletion      | chr7  | p22.3           | 246,786     | 254,401     | 5  | -1.011639 | 6.35E-17  |                                                                                                                                                                                                           |
| Amplification | chr7  | p22.3           | 1,037,402   | 1,047,766   | 4  | 1.843219  | 3.24E-37  | C7orf50                                                                                                                                                                                                   |
| Amplification | chr7  | p22.3           | 1,943,492   | 1,953,587   | 5  | 0.755354  | 1.71E-10  | MAD111                                                                                                                                                                                                    |
| Deletion      | chr7  | p21.3           | 11,740,559  | 11,743,822  | 3  | -1.134455 | 2.01E-13  | THSD7A                                                                                                                                                                                                    |
| Deletion      | chr7  | p14.1           | 38,262,701  | 38,349,092  | 45 | -0.436403 | 4.70E-31  | TARP                                                                                                                                                                                                      |
| Deletion      | chr7  | q22.1           | 100,166,257 | 100,175,050 | 4  | -1.024747 | 7.15E-15  | ZAN                                                                                                                                                                                                       |
| Amplification | chr7  | q22.3           | 106,692,806 | 106,734,547 | 18 | 0.638711  | 3.33E-27  | COG5                                                                                                                                                                                                      |
| Amplification | chr7  | q31.1           | 109,230,336 | 109,240,269 | 5  | 0.859632  | 2.09E-12  |                                                                                                                                                                                                           |
| Deletion      | chr7  | q31.31          | 118,618,468 | 118,620,934 | 3  | -0.927797 | 9.46E-11  |                                                                                                                                                                                                           |
| Amplification | chr7  | q31.33          | 125,833,251 | 125,837,583 | 3  | 1.012618  | 6.40E-12  |                                                                                                                                                                                                           |
| Deletion      | chr7  | q33             | 133,436,265 | 133,448,336 | 8  | -1.055847 | 3.89E-29  |                                                                                                                                                                                                           |
| Deletion      | chr7  | q34             | 141,414,719 | 141,440,243 | 13 | -0.796458 | 8.27E-25  | MGAM                                                                                                                                                                                                      |
| Deletion      | chr7  | q34             | 141,698,634 | 141,714,227 | 10 | -4.893995 | 3.04E-136 |                                                                                                                                                                                                           |
| Deletion      | chr7  | q34             | 142,135,117 | 142,167,957 | 12 | -0.739012 | 1.02E-23  | PRSS1, TRY6                                                                                                                                                                                               |
| Amplification | chr8  | p23.1           | 7,226,901   | 7,824,118   | 9  | 1.24757   | 8.18E-46  | DEFB103A, DEFB103B, SPAG11B, DEFB104A, DEFB104B, DEFB106A, DEFB106B, DEFB105A, DEFB105B, DEFB107A, DEFB107B, FAM90A7, FAM90A14, FAM90A13, FAM90A19, FAM90A18, FAM90A8, FAM90A9, FAM90A10, SPAG11A, DEFB4A |
| Amplification | chr8  | p21.2           | 25,030,003  | 25,039,429  | 3  | 1.238897  | 6.38E-17  |                                                                                                                                                                                                           |
| Amplification | chr8  | p11.23 - p11.22 | 39,352,361  | 39,505,315  | 59 | 2.911821  | NA        | ADAM5P, ADAM3A                                                                                                                                                                                            |
| Amplification | chr8  | p11.21          | 42,712,612  | 42,739,788  | 13 | 0.630028  | 1.72E-20  | CHRNA6                                                                                                                                                                                                    |
| Amplification | chr8  | q11.22          | 51,193,977  | 51,200,350  | 4  | 1.087219  | 2.08E-18  | SNTG1                                                                                                                                                                                                     |
| Amplification | chr9  | p24.1           | 6,692,831   | 6,698,349   | 3  | 1.097657  | 3.32E-11  |                                                                                                                                                                                                           |
| Amplification | chr9  | p11.2           | 43,445,839  | 44,199,460  | 7  | 1.012607  | 1.70E-23  | FAM75A6, KGFLP1                                                                                                                                                                                           |
| Deletion      | chr9  | q31.3           | 111,609,722 | 111,616,469 | 3  | -1.147549 | 1.84E-13  | PALM2, PALM2-AKAP2                                                                                                                                                                                        |
| Amplification | chr10 | p11.23          | 31,287,101  | 31,291,584  | 3  | 4.944668  | 2.58E-58  | ZNF438                                                                                                                                                                                                    |
| Deletion      | chr10 | q21.1           | 59,944,705  | 59,955,586  | 6  | -0.70087  | 2.27E-12  | BICC1                                                                                                                                                                                                     |
| Deletion      | chr10 | q25.2           | 113,201,227 | 113,343,540 | 32 | -0.969487 | 2.57E-97  |                                                                                                                                                                                                           |
| Deletion      | chr10 | q26.3           | 135,102,317 | 135,227,522 | 44 | -0.895754 | 1.75E-109 | LOC619207, CYP2E1, SYCE1                                                                                                                                                                                  |
| Deletion      | chr11 | p15.4           | 7,762,277   | 7,783,551   | 9  | -0.982363 | 3.05E-26  | OR5P2                                                                                                                                                                                                     |
| Amplification | chr11 | q11             | 55,123,719  | 55,207,364  | 38 | 1.030477  | 1.61E-134 | OR4C11, OR4P4, OR4S2, OR4C6                                                                                                                                                                               |
| Amplification | chr11 | q22.1           | 98,271,459  | 98,311,618  | 19 | 1.056476  | 5.54E-61  |                                                                                                                                                                                                           |



|               |       |               |             |             |     |           |           |                                        |
|---------------|-------|---------------|-------------|-------------|-----|-----------|-----------|----------------------------------------|
| Deletion      | chr11 | q22.3         | 106,744,337 | 106,747,979 | 4   | -6.310143 | 2.43E-74  | CWF19L2                                |
| Amplification | chr12 | p13.31        | 9,528,590   | 9,589,784   | 11  | 0.729032  | 2.57E-21  |                                        |
| Amplification | chr12 | p13.2         | 11,116,883  | 11,140,477  | 8   | 0.880151  | 1.87E-20  | PRR4, PRH1, TAS2R43                    |
| Amplification | chr12 | p13.2         | 11,419,189  | 11,435,698  | 6   | 0.65522   | 7.36E-11  |                                        |
| Amplification | chr12 | q24.31        | 123,370,406 | 123,374,950 | 3   | 1.13774   | 5.28E-16  | NCOR2                                  |
| Deletion      | chr13 | q21.1         | 56,657,371  | 56,686,922  | 16  | -0.867888 | 6.54E-48  |                                        |
| Amplification | chr13 | q21.33        | 71,705,959  | 71,730,915  | 5   | 0.78234   | 1.64E-11  |                                        |
| Deletion      | chr14 | q11.2         | 21,497,838  | 22,074,765  | 292 | -0.351063 | 1.19E-123 |                                        |
| Deletion      | chr14 | q21.1         | 40,680,589  | 40,726,989  | 8   | -1.006615 | 1.72E-27  |                                        |
| Deletion      | chr14 | q21.3         | 43,571,616  | 43,597,724  | 5   | -1.013632 | 4.29E-20  |                                        |
| Deletion      | chr14 | q24.2         | 71,876,605  | 71,880,632  | 3   | -1.136217 | 2.00E-10  | RGS6                                   |
| Deletion      | chr14 | q24.3         | 73,071,404  | 73,092,168  | 8   | -1.50772  | 1.03E-57  | HEATR4, ACOT1                          |
| Amplification | chr14 | q24.3         | 73,309,616  | 73,315,376  | 4   | 0.924752  | 4.95E-11  | C14orf43                               |
| Amplification | chr14 | q32.33        | 105,403,001 | 105,441,928 | 11  | 3.164488  | 1.38E-127 |                                        |
| Amplification | chr14 | q32.33        | 105,606,424 | 105,632,227 | 11  | 0.838035  | 1.85E-26  |                                        |
| Deletion      | chr14 | q32.33        | 106,199,156 | 106,255,249 | 26  | -0.443361 | 4.67E-20  |                                        |
| Amplification | chr15 | q24.3         | 74,671,626  | 74,680,498  | 4   | 3.514713  | 3.14E-59  | SCAPER                                 |
| Amplification | chr15 | q25.2         | 81,095,411  | 81,253,557  | 74  | 0.968851  | 2.02E-218 | CPEB1, AP3B2, SCARNA15, FSD2           |
| Deletion      | chr16 | p13.11        | 14,956,177  | 15,030,000  | 14  | -0.72321  | 8.22E-28  | PDXDC1                                 |
| Amplification | chr16 | p11.2         | 28,511,295  | 28,529,999  | 6   | 0.891889  | 1.15E-17  | SULT1A2, SULT1A1                       |
| Amplification | chr16 | p11.2         | 32,379,126  | 33,559,266  | 46  | 0.437566  | 2.00E-33  | TP53TG3B, TP53TG3, SLC6A10P, LOC390705 |
| Deletion      | chr16 | q12.2         | 54,353,978  | 54,379,898  | 10  | -0.71548  | 1.06E-18  | CES4                                   |
| Amplification | chr16 | q12.2         | 54,399,890  | 54,408,498  | 5   | 0.845364  | 1.29E-14  | CES1                                   |
| Deletion      | chr16 | q24.1         | 83,271,193  | 83,275,780  | 3   | -1.08451  | 6.51E-14  |                                        |
| Deletion      | chr16 | q24.3         | 87,345,556  | 87,415,072  | 29  | -0.407307 | 6.36E-18  | FAM38A, CDT1, APRT, GALNS              |
| Amplification | chr17 | p11.2         | 21,115,537  | 21,195,649  | 33  | 0.37245   | 2.56E-18  | MAP2K3                                 |
| Amplification | chr17 | q12           | 31,461,588  | 31,503,833  | 19  | 0.573006  | 4.08E-27  |                                        |
| Deletion      | chr17 | q21.31        | 41,521,544  | 41,710,444  | 67  | -1.009271 | 1.62E-238 | KIAA1267                               |
| Deletion      | chr18 | q22.1         | 60,535,127  | 60,546,512  | 3   | -0.99386  | 6.16E-13  |                                        |
| Amplification | chr19 | p12           | 20,420,327  | 20,507,294  | 16  | 0.758792  | 6.66E-27  |                                        |
| Amplification | chr19 | q13.12        | 41,816,989  | 42,052,486  | 104 | 0.907736  | 2.41E-282 | ZNF461, ZNF567, ZNF790, ZNF345         |
| Amplification | chr19 | q13.2         | 44,589,371  | 44,595,615  | 6   | 0.667723  | 6.97E-11  | ZFP36, PLEKHG2                         |
| Amplification | chr19 | q13.32        | 51,316,654  | 51,319,060  | 3   | 1.142428  | 6.17E-14  | IGFL3                                  |
| Amplification | chr19 | q13.42        | 59,249,279  | 59,251,879  | 3   | 1.007479  | 1.04E-12  | VSTM1                                  |
| Deletion      | chr19 | q13.42        | 59,421,197  | 59,434,253  | 10  | -0.61005  | 2.18E-15  | LILRA6                                 |
| Deletion      | chr19 | q13.42        | 61,376,464  | 61,378,768  | 3   | -0.978273 | 4.84E-11  |                                        |
| Deletion      | chr20 | p13           | 1,511,632   | 1,532,485   | 10  | -0.946383 | 5.83E-30  | SIRPB1                                 |
| Amplification | chr20 | q13.2         | 52,081,719  | 52,090,452  | 5   | 0.886181  | 5.47E-12  | BCAS1                                  |
| Amplification | chr21 | p11.2 - p11.1 | 9,882,922   | 10,022,365  | 10  | 1.006004  | 1.89E-37  | TPTE                                   |
| Amplification | chr21 | q22.3         | 46,278,360  | 46,281,557  | 3   | 1.05555   | 2.00E-11  |                                        |
| Amplification | chr22 | q11.23        | 23,994,618  | 24,241,651  | 90  | 0.47437   | 1.48E-72  | IGLL3, LRP5L, CRYBB2P1                 |
| Deletion      | chr22 | q13.1         | 37,689,058  | 37,715,431  | 16  | -4.119449 | 1.79E-206 | APOBEC3A, APOBEC3B                     |

|               |       |       |            |            |    |          |          |              |
|---------------|-------|-------|------------|------------|----|----------|----------|--------------|
| Amplification | chr22 | q13.2 | 41,226,643 | 41,279,529 | 11 | 0.656044 | 2.40E-21 | SERHL, RRP7A |
|---------------|-------|-------|------------|------------|----|----------|----------|--------------|

## MM III:3

| Type          | Chr  | Cytoband      | Start       | Stop        | #Probes | Amplification/Deletion Score | pval      | Gene Names                  |
|---------------|------|---------------|-------------|-------------|---------|------------------------------|-----------|-----------------------------|
| Amplification | chr1 | p34.3         | 34,876,833  | 34,883,434  | 4       | 1.386675                     | 1.13E-14  |                             |
| Deletion      | chr1 | q21.1         | 147,313,991 | 147,475,913 | 28      | -0.618109                    | 1.08E-19  |                             |
| Deletion      | chr1 | q21.3         | 150,823,073 | 150,851,498 | 11      | -2.856605                    | 3.25E-88  | LCE3C                       |
| Amplification | chr1 | q21.3         | 151,028,700 | 151,036,494 | 4       | 3.021846                     | 9.60E-47  | LCE1D                       |
| Amplification | chr1 | q31.1         | 187,972,203 | 188,041,994 | 12      | 0.84378                      | 6.05E-16  |                             |
| Amplification | chr1 | q32.1         | 199,456,866 | 199,488,494 | 10      | 0.723745                     | 1.82E-10  | IGFN1                       |
| Amplification | chr1 | q42.13        | 227,879,152 | 227,882,854 | 4       | 2.485168                     | 6.43E-32  |                             |
| Amplification | chr1 | q44           | 246,794,552 | 246,860,610 | 26      | 3.378045                     | 3.24E-294 | OR2T34, OR2T10, OR2T11      |
| Amplification | chr2 | p22.3         | 34,543,992  | 34,591,740  | 20      | 0.77966                      | 3.58E-20  |                             |
| Deletion      | chr2 | p22.2         | 37,803,744  | 37,855,895  | 24      | -0.525833                    | 6.68E-13  |                             |
| Amplification | chr2 | p16.3         | 52,604,016  | 52,635,754  | 5       | 3.441948                     | 1.86E-66  |                             |
| Amplification | chr2 | p11.2         | 88,914,081  | 88,941,307  | 14      | 3.121944                     | 7.81E-40  |                             |
| Amplification | chr2 | p11.2         | 88,914,081  | 89,093,705  | 64      | 1.522961                     | 7.54E-213 |                             |
| Amplification | chr2 | p11.2         | 88,967,005  | 88,977,899  | 6       | 4.119669                     | 1.01E-35  |                             |
| Amplification | chr2 | p11.2         | 88,984,458  | 89,057,332  | 28      | 0.934826                     | 6.25E-18  |                             |
| Amplification | chr2 | q22.3         | 146,582,195 | 146,592,834 | 4       | 3.79823                      | 4.77E-54  |                             |
| Deletion      | chr2 | q31.2         | 179,565,415 | 179,594,654 | 10      | -1.004984                    | 4.72E-18  | CCDC141                     |
| Deletion      | chr3 | q13.31        | 116,140,997 | 116,147,005 | 4       | -1.288895                    | 1.07E-12  | ZBTB20                      |
| Deletion      | chr3 | q26.1         | 163,997,228 | 164,108,010 | 28      | -4.163509                    | 1.64E-210 |                             |
| Deletion      | chr3 | q26.1         | 164,009,321 | 164,027,783 | 5       | -0.270767                    | 2.89E-16  |                             |
| Deletion      | chr3 | q29           | 194,358,882 | 194,367,009 | 6       | -2.904487                    | 1.19E-30  |                             |
| Amplification | chr3 | q29           | 196,835,413 | 196,964,229 | 32      | 0.487221                     | 2.96E-14  | SDHAP2, MIR570, MUC20, MUC4 |
| Amplification | chr4 | p15.1         | 34,457,648  | 34,491,174  | 6       | 3.798693                     | 7.37E-85  |                             |
| Amplification | chr4 | q21.1         | 78,495,363  | 78,506,379  | 7       | 0.996837                     | 1.00E-12  |                             |
| Deletion      | chr4 | q26           | 119,345,371 | 119,350,413 | 4       | -1.156265                    | 6.45E-10  | NDST3                       |
| Amplification | chr4 | q35.2         | 190,701,706 | 190,924,623 | 70      | 0.359605                     | 1.85E-14  |                             |
| Deletion      | chr5 | q15           | 95,563,307  | 95,589,865  | 9       | -0.769058                    | 1.08E-10  |                             |
| Amplification | chr5 | q21.2 - q21.3 | 104,452,261 | 104,528,503 | 13      | 1.262947                     | 2.31E-36  | RAB9BP1                     |
| Deletion      | chr5 | q33.1         | 150,185,190 | 150,202,660 | 7       | -1.157017                    | 1.56E-16  |                             |
| Deletion      | chr5 | q35.3         | 180,342,860 | 180,359,036 | 9       | -0.83895                     | 2.14E-12  | BTNL3                       |
| Deletion      | chr6 | p21.33        | 29,962,849  | 30,010,293  | 15      | -3.26989                     | 1.17E-154 | HLA-H, HCG2P7, HCG4P6       |
| Deletion      | chr6 | p21.32        | 32,716,255  | 32,728,546  | 8       | -1.887289                    | 1.58E-34  | HLA-DQA1                    |
| Deletion      | chr6 | p21.32        | 32,745,693  | 32,762,120  | 5       | -1.373881                    | 1.37E-17  |                             |
| Amplification | chr6 | p12.1         | 54,037,199  | 54,042,793  | 3       | 2.919268                     | 2.22E-28  | C6orf142                    |
| Amplification | chr6 | p12.1         | 55,934,816  | 55,946,682  | 4       | 1.104228                     | 6.12E-10  |                             |
| Amplification | chr6 | q14.1         | 79,024,557  | 79,091,909  | 13      | 0.969755                     | 3.08E-22  |                             |
| Deletion      | chr6 | q16.3         | 103,845,083 | 103,868,213 | 4       | -4.515655                    | 4.81E-32  |                             |
| Deletion      | chr6 | q23.2         | 134,631,701 | 134,635,838 | 4       | -5.540215                    | 3.43E-65  | SGK1                        |
| Amplification | chr6 | q27           | 165,645,537 | 165,650,669 | 4       | 3.854855                     | 1.07E-59  |                             |
| Amplification | chr7 | p22.3         | 1,037,402   | 1,047,766   | 4       | 1.845008                     | 1.50E-24  | C7orf50                     |

|               |       |                 |             |             |     |           |           |                                                                                                                                                                                                           |
|---------------|-------|-----------------|-------------|-------------|-----|-----------|-----------|-----------------------------------------------------------------------------------------------------------------------------------------------------------------------------------------------------------|
| Amplification | chr7  | p22.3           | 1,253,181   | 1,282,187   | 11  | 0.753504  | 5.03E-11  |                                                                                                                                                                                                           |
| Deletion      | chr7  | p14.1           | 38,274,436  | 38,320,676  | 26  | -0.52543  | 1.37E-13  | TARP                                                                                                                                                                                                      |
| Amplification | chr7  | q31.33          | 125,833,251 | 125,837,583 | 3   | 4.250955  | 8.32E-48  |                                                                                                                                                                                                           |
| Deletion      | chr7  | q33             | 133,437,464 | 133,448,336 | 7   | -1.211141 | 3.05E-18  |                                                                                                                                                                                                           |
| Deletion      | chr7  | q34             | 141,698,634 | 141,714,227 | 10  | -4.072226 | 9.33E-94  |                                                                                                                                                                                                           |
| Deletion      | chr7  | q34             | 142,135,117 | 142,194,590 | 18  | -0.558132 | 1.20E-10  | PRSS1, TRY6, PRSS2                                                                                                                                                                                        |
| Amplification | chr8  | p23.1           | 7,226,901   | 7,824,118   | 9   | 1.058259  | 4.83E-17  | DEFB103A, DEFB103B, SPAG11B, DEFB104A, DEFB104B, DEFB106A, DEFB106B, DEFB105A, DEFB105B, DEFB107A, DEFB107B, FAM90A7, FAM90A14, FAM90A13, FAM90A19, FAM90A18, FAM90A8, FAM90A9, FAM90A10, SPAG11A, DEFB4A |
| Amplification | chr8  | p11.23 - p11.22 | 39,350,798  | 39,505,315  | 60  | 0.928272  | 1.94E-86  | ADAM5P, ADAM3A                                                                                                                                                                                            |
| Amplification | chr8  | p11.21          | 42,712,612  | 42,739,788  | 13  | 0.765952  | 1.46E-14  | CHRNA6                                                                                                                                                                                                    |
| Deletion      | chr9  | p13.1 - p11.2   | 38,758,232  | 43,599,508  | 10  | -0.776883 | 5.95E-11  | CNTNAP3, FAM75A1, FAM75A2, LOC653501, ZNF658B, FAM74A1, FAM75A3, FAM74A3, ZNF658, FAM75A5, FAM75A7, MGC21881, KGFLP2, ANKRD20A2, ANKRD20A3, FAM95B1, FOXD4L2, FOXD4L4, AQP7P3, LOC642929, FAM75A6         |
| Deletion      | chr9  | q31.3           | 111,609,722 | 111,619,187 | 4   | -1.116231 | 4.04E-10  | PALM2, PALM2-AKAP2                                                                                                                                                                                        |
| Amplification | chr10 | p15.3           | 675,778     | 685,551     | 5   | 1.069992  | 4.52E-10  | DIP2C                                                                                                                                                                                                     |
| Amplification | chr10 | q11.22          | 46,391,653  | 46,568,552  | 69  | 0.356529  | 2.21E-16  | GPRIN2, PPYR1, LOC643650, LOC728643                                                                                                                                                                       |
| Amplification | chr10 | q11.23          | 52,873,705  | 52,881,546  | 5   | 1.259485  | 4.50E-15  | PRKG1                                                                                                                                                                                                     |
| Amplification | chr10 | q26.3           | 134,739,406 | 134,743,482 | 3   | 1.422993  | 7.69E-11  |                                                                                                                                                                                                           |
| Deletion      | chr10 | q26.3           | 135,102,317 | 135,229,840 | 45  | -0.787025 | 3.21E-47  | LOC619207, CYP2E1, SYCE1                                                                                                                                                                                  |
| Amplification | chr11 | p15.5           | 1,104,014   | 1,105,396   | 3   | 1.68739   | 3.92E-14  |                                                                                                                                                                                                           |
| Deletion      | chr11 | p15.4           | 4,926,583   | 4,932,273   | 5   | -4.727432 | 6.72E-57  |                                                                                                                                                                                                           |
| Deletion      | chr11 | p15.4           | 5,742,476   | 5,765,497   | 15  | -1.14831  | 9.91E-35  | OR52N5                                                                                                                                                                                                    |
| Deletion      | chr11 | q11             | 55,123,719  | 55,209,685  | 39  | -3.520518 | 2.00E-323 | OR4C11, OR4P4, OR4S2, OR4C6                                                                                                                                                                               |
| Deletion      | chr11 | q12.3           | 61,975,418  | 61,984,707  | 6   | -1.152937 | 3.79E-15  | AHNAK                                                                                                                                                                                                     |
| Amplification | chr11 | q13.1           | 65,847,130  | 65,851,999  | 4   | 1.13949   | 1.79E-10  |                                                                                                                                                                                                           |
| Amplification | chr12 | p13.31          | 9,528,590   | 9,554,208   | 5   | 2.75279   | 3.00E-36  |                                                                                                                                                                                                           |
| Amplification | chr12 | p13.2           | 11,109,483  | 11,147,734  | 13  | 0.797345  | 1.25E-14  | PRR4, PRH1, TAS2R43                                                                                                                                                                                       |
| Amplification | chr12 | p13.2           | 11,419,189  | 11,435,698  | 6   | 1.556592  | 4.41E-26  |                                                                                                                                                                                                           |
| Amplification | chr12 | q24.31          | 123,370,406 | 123,378,308 | 4   | 1.345119  | 6.54E-14  | NCOR2                                                                                                                                                                                                     |
| Amplification | chr13 | q12.11          | 18,463,142  | 18,469,562  | 6   | 0.936846  | 1.35E-10  |                                                                                                                                                                                                           |
| Deletion      | chr13 | q21.1           | 56,657,371  | 56,686,922  | 16  | -0.973755 | 1.52E-29  |                                                                                                                                                                                                           |
| Amplification | chr13 | q34             | 113,787,620 | 113,793,033 | 4   | 1.498642  | 7.98E-16  | RASA3                                                                                                                                                                                                     |
| Amplification | chr14 | q11.1 - q11.2   | 18,798,641  | 19,494,475  | 54  | 0.564747  | 5.13E-30  | POTEM, OR4Q3, OR4M1, OR4N2, OR4K2, OR4K5, OR4K1                                                                                                                                                           |
| Deletion      | chr14 | q11.2           | 21,481,361  | 22,089,626  | 303 | -0.260951 | 7.16E-36  |                                                                                                                                                                                                           |
| Deletion      | chr14 | q21.3           | 43,571,616  | 43,597,724  | 5   | -1.008185 | 2.76E-10  |                                                                                                                                                                                                           |
| Amplification | chr14 | q24.3           | 73,071,404  | 73,092,168  | 8   | 1.885088  | 4.26E-49  | HEATR4, ACOT1                                                                                                                                                                                             |
| Amplification | chr14 | q32.33          | 105,314,254 | 105,432,573 | 42  | 2.806305  | NA        |                                                                                                                                                                                                           |
| Amplification | chr14 | q32.33          | 105,397,801 | 105,401,460 | 3   | 0.257625  | 2.70E-34  |                                                                                                                                                                                                           |
| Amplification | chr14 | q32.33          | 105,403,001 | 105,416,455 | 7   | 4.392565  | 4.07E-16  |                                                                                                                                                                                                           |

|               |       |               |             |             |     |           |           |                                                                                                       |
|---------------|-------|---------------|-------------|-------------|-----|-----------|-----------|-------------------------------------------------------------------------------------------------------|
| Amplification | chr14 | q32.33        | 105,441,874 | 105,597,614 | 37  | 0.886078  | 8.97E-48  | KIAA0125, ADAM6                                                                                       |
| Deletion      | chr14 | q32.33        | 105,602,602 | 105,632,227 | 12  | -3.558707 | 4.99E-114 |                                                                                                       |
| Amplification | chr14 | q32.33        | 105,673,157 | 105,761,975 | 15  | 0.751218  | 4.00E-15  |                                                                                                       |
| Amplification | chr14 | q32.33        | 105,856,591 | 105,881,952 | 7   | 2.13062   | 2.24E-46  |                                                                                                       |
| Amplification | chr15 | q11.2         | 18,741,716  | 20,079,994  | 149 | 0.663655  | 1.82E-109 | GOLGA6L6, GOLGA8C, BCL8, LOC646214, CXADRP2, POTE8, NF1P1, LOC727924, OR4M2, OR4N4, OR4N3P, LOC646396 |
| Amplification | chr15 | q24.3         | 74,671,626  | 74,680,498  | 4   | 3.407652  | 2.68E-60  | SCAPER                                                                                                |
| Deletion      | chr16 | p11.2 - p11.1 | 34,325,501  | 34,584,850  | 49  | -0.418019 | 6.47E-16  | LOC283914, LOC146481                                                                                  |
| Amplification | chr17 | q12           | 31,470,227  | 31,893,500  | 18  | 0.686862  | 5.19E-16  | TBC1D3B, CCL3L1, CCL3L3, CCL4L2, CCL4L1, TBC1D3C, TBC1D3F, TBC1D3H, TBC1D3G                           |
| Deletion      | chr17 | q21.31        | 41,521,544  | 41,710,444  | 67  | -0.946505 | 2.81E-101 | KIAA1267                                                                                              |
| Amplification | chr17 | q25.3         | 72,987,846  | 72,995,167  | 4   | 1.180903  | 4.02E-11  | 9-Sep                                                                                                 |
| Amplification | chr19 | p12           | 20,422,223  | 20,507,294  | 15  | 0.735098  | 1.07E-12  |                                                                                                       |
| Amplification | chr19 | q13.32        | 51,911,733  | 51,917,680  | 4   | 1.103304  | 6.32E-10  | PRKD2, STRN4                                                                                          |
| Deletion      | chr19 | q13.33        | 56,825,794  | 56,840,401  | 8   | -4.24742  | 1.12E-74  | SIGLEC14                                                                                              |
| Amplification | chr21 | p11.2 - p11.1 | 9,882,922   | 10,079,713  | 13  | 0.688537  | 4.16E-12  | TPTE, BAGE4, BAGE5, BAGE2, BAGE3, BAGE                                                                |
| Deletion      | chr21 | q22.3         | 46,606,880  | 46,760,545  | 86  | -0.890336 | 5.12E-107 | PCNT, DIP2A                                                                                           |
| Amplification | chr22 | q11.22        | 20,717,815  | 21,365,588  | 282 | 0.770396  | 4.04E-273 | VPREB1, LOC96610, ZNF280B, ZNF280A, PRAME, LOC648691, POM121L1P, GGTL2                                |
| Amplification | chr22 | q11.22        | 21,369,512  | 21,576,911  | 126 | 2.750558  | NA        | MIR650, IGLL5                                                                                         |
| Amplification | chr22 | q11.22        | 21,412,285  | 21,430,376  | 10  | 1.977982  | 3.39E-11  |                                                                                                       |
| Amplification | chr22 | q11.22        | 21,502,285  | 21,506,435  | 4   | 1.420064  | 3.20E-10  |                                                                                                       |
| Amplification | chr22 | q11.22        | 21,558,810  | 21,568,919  | 5   | 4.352434  | 9.25E-13  | IGLL5                                                                                                 |
| Deletion      | chr22 | q11.23        | 22,677,959  | 22,725,353  | 22  | -0.973834 | 1.42E-36  | LOC391322, GSTT1, GSTTP2                                                                              |
| Deletion      | chr22 | q13.1         | 37,689,058  | 37,715,431  | 16  | -4.062707 | 1.81E-201 | APOBEC3A, APOBEC3B                                                                                    |
| Amplification | chr22 | q13.2         | 41,237,731  | 41,279,529  | 9   | 0.817369  | 7.45E-12  | SERHL, RRP7A                                                                                          |

## MM III:4

| Type          | Chr  | Cytoband | Start       | Stop        | #Probes | Amplification/Deletion Score | pval      | Gene Names              |
|---------------|------|----------|-------------|-------------|---------|------------------------------|-----------|-------------------------|
| Amplification | chr1 | p36.13   | 17,080,364  | 17,160,433  | 18      | 0.381065                     | 2.81E-13  | CROCC                   |
| Amplification | chr1 | p36.11   | 25,482,036  | 25,561,522  | 15      | 0.543415                     | 3.77E-25  | RHD, TMEM50A, RHCE      |
| Amplification | chr1 | p34.3    | 37,692,387  | 37,696,262  | 3       | 1.165652                     | 4.96E-18  |                         |
| Deletion      | chr1 | p31.1    | 72,312,152  | 72,318,249  | 5       | -0.791957                    | 3.22E-13  | NEGR1                   |
| Amplification | chr1 | p31.1    | 72,539,143  | 72,550,633  | 7       | 3.614275                     | 3.75E-70  |                         |
| Amplification | chr1 | p22.3    | 86,171,390  | 86,175,326  | 3       | 0.879695                     | 9.17E-11  | COL24A1                 |
| Amplification | chr1 | p13.3    | 110,033,018 | 110,041,771 | 4       | 1.812713                     | 3.31E-31  | GSTM1                   |
| Deletion      | chr1 | q21.1    | 147,308,557 | 147,497,322 | 33      | -0.552856                    | 3.35E-45  |                         |
| Amplification | chr1 | q21.3    | 150,836,481 | 150,851,498 | 10      | 3.084364                     | 1.94E-100 | LCE3C                   |
| Amplification | chr1 | q25.2    | 177,596,757 | 177,599,656 | 3       | 1.039692                     | 1.64E-13  |                         |
| Amplification | chr1 | q25.3    | 179,017,844 | 179,021,893 | 3       | 0.823721                     | 2.96E-10  | XPR1                    |
| Amplification | chr1 | q44      | 246,811,355 | 246,875,075 | 27      | 0.830038                     | 1.76E-71  | OR2T10, OR2T11, OR2T35  |
| Amplification | chr2 | p22.3    | 34,551,222  | 34,590,056  | 18      | 3.729213                     | 6.47E-206 |                         |
| Amplification | chr2 | p22.1    | 41,092,989  | 41,101,699  | 5       | 1.302319                     | 8.96E-24  |                         |
| Deletion      | chr2 | p16.3    | 52,111,476  | 52,141,375  | 10      | -0.723285                    | 8.45E-29  |                         |
| Amplification | chr2 | p16.3    | 52,604,016  | 52,635,754  | 5       | 3.396846                     | 1.37E-65  |                         |
| Amplification | chr2 | p11.2    | 88,967,005  | 88,977,899  | 6       | 0.963409                     | 1.99E-22  |                         |
| Amplification | chr2 | q24.1    | 155,527,714 | 155,535,770 | 3       | 1.022206                     | 4.19E-13  |                         |
| Deletion      | chr2 | q31.2    | 178,552,260 | 178,555,301 | 3       | -0.823319                    | 1.22E-10  | PDE11A                  |
| Deletion      | chr2 | q37.3    | 238,461,353 | 238,469,276 | 5       | -0.796799                    | 3.29E-12  | RAMP1                   |
| Deletion      | chr3 | p21.31   | 47,209,546  | 47,227,006  | 6       | -0.958585                    | 4.97E-20  | FLJ39534                |
| Deletion      | chr3 | q21.3    | 128,709,159 | 128,714,207 | 3       | -0.940403                    | 3.70E-13  |                         |
| Amplification | chr3 | q29      | 196,835,413 | 196,929,885 | 21      | 0.374287                     | 8.94E-16  | SDHAP2, MIR570          |
| Deletion      | chr3 | q29      | 196,943,380 | 196,952,558 | 5       | -0.73539                     | 3.21E-12  | MUC20                   |
| Amplification | chr4 | p15.1    | 34,457,648  | 34,491,174  | 6       | 1.18359                      | 9.64E-29  |                         |
| Deletion      | chr4 | q13.2    | 69,069,651  | 69,165,872  | 14      | -3.670083                    | 7.82E-146 | UGT2B17                 |
| Amplification | chr4 | q21.1    | 78,495,363  | 78,508,227  | 8       | 0.82062                      | 1.17E-22  |                         |
| Deletion      | chr4 | q24      | 107,276,428 | 107,281,469 | 4       | -0.970022                    | 3.85E-17  | TBCK                    |
| Deletion      | chr4 | q26      | 119,345,371 | 119,348,888 | 3       | -1.29009                     | 7.72E-17  | NDST3                   |
| Amplification | chr4 | q32.1    | 161,268,543 | 161,288,761 | 3       | 1.018389                     | 1.19E-10  |                         |
| Deletion      | chr5 | p15.33   | 776,194     | 830,000     | 6       | -0.789404                    | 2.57E-18  |                         |
| Deletion      | chr5 | q13.3    | 75,647,535  | 75,696,084  | 19      | -0.558301                    | 5.82E-28  | SV2C                    |
| Amplification | chr5 | q31.2    | 137,836,466 | 137,843,368 | 4       | 1.002817                     | 2.25E-15  |                         |
| Deletion      | chr5 | q31.3    | 140,535,820 | 140,541,237 | 3       | -0.967383                    | 1.45E-11  | PCDHB7, PCDHB8, PCDHB16 |
| Amplification | chr5 | q33.1    | 147,622,818 | 147,666,493 | 19      | 0.607939                     | 3.79E-33  | SPINK13                 |
| Deletion      | chr5 | q33.1    | 150,185,190 | 150,204,193 | 8       | -0.904927                    | 1.08E-25  |                         |
| Deletion      | chr5 | q33.2    | 155,411,053 | 155,421,502 | 5       | -0.949004                    | 3.51E-18  |                         |
| Deletion      | chr5 | q35.3    | 180,344,964 | 180,362,394 | 9       | -0.880631                    | 3.91E-29  | BTNL3                   |
| Amplification | chr6 | p25.3    | 200,350     | 326,382     | 62      | 0.378978                     | 1.64E-43  | DUSP22                  |
| Deletion      | chr6 | p21.33   | 30,030,032  | 30,040,976  | 5       | -0.798199                    | 4.16E-11  |                         |

|               |       |                 |             |             |    |           |           |                          |
|---------------|-------|-----------------|-------------|-------------|----|-----------|-----------|--------------------------|
| Deletion      | chr6  | p21.32          | 32,563,252  | 32,605,359  | 10 | -4.135634 | 1.61E-109 | HLA-DRB5                 |
| Deletion      | chr6  | p21.32          | 32,629,848  | 32,633,740  | 3  | -4.6596   | 2.39E-41  | HLA-DRB6                 |
| Deletion      | chr6  | p21.32          | 32,716,255  | 32,728,546  | 8  | -1.391192 | 2.92E-27  | HLA-DQA1                 |
| Deletion      | chr6  | p21.32          | 32,745,693  | 32,762,120  | 5  | -1.647505 | 5.61E-37  |                          |
| Deletion      | chr6  | p21.32          | 32,785,011  | 32,790,258  | 3  | -1.189755 | 1.10E-12  |                          |
| Amplification | chr6  | p12.1           | 54,037,199  | 54,042,793  | 3  | 4.430932  | 3.32E-53  | C6orf142                 |
| Amplification | chr6  | p12.1           | 55,934,816  | 55,946,682  | 4  | 1.184062  | 5.52E-23  |                          |
| Deletion      | chr6  | q12             | 67,068,673  | 67,105,297  | 6  | -0.557308 | 4.98E-13  |                          |
| Amplification | chr6  | q13             | 74,650,995  | 74,655,278  | 3  | 0.936728  | 1.03E-11  |                          |
| Deletion      | chr6  | q14.1           | 77,499,382  | 77,510,042  | 3  | -0.932083 | 1.05E-12  |                          |
| Amplification | chr6  | q14.1           | 79,024,557  | 79,091,909  | 13 | 1.078613  | 2.93E-56  |                          |
| Deletion      | chr6  | q16.3           | 103,845,083 | 103,868,213 | 4  | -4.392706 | 5.00E-40  |                          |
| Amplification | chr6  | q23.2           | 132,749,309 | 132,752,540 | 3  | 1.13555   | 5.41E-16  | MOXD1                    |
| Deletion      | chr6  | q23.2           | 134,631,701 | 134,635,838 | 4  | -1.04061  | 3.23E-18  | SGK1                     |
| Amplification | chr6  | q25.2           | 155,160,734 | 155,163,954 | 3  | 1.000833  | 1.42E-14  | RBM16                    |
| Amplification | chr6  | q27             | 165,645,537 | 165,650,669 | 4  | 4.162203  | 9.93E-65  |                          |
| Amplification | chr7  | p22.3           | 1,037,402   | 1,047,766   | 4  | 1.206104  | 1.65E-23  | C7orf50                  |
| Amplification | chr7  | p22.3           | 1,267,047   | 1,277,824   | 5  | 0.640243  | 5.87E-11  |                          |
| Deletion      | chr7  | p14.1           | 38,277,728  | 38,337,971  | 34 | -0.3225   | 2.17E-17  | TARP                     |
| Deletion      | chr7  | q22.1           | 100,166,257 | 100,175,050 | 4  | -0.959025 | 6.70E-16  | ZAN                      |
| Amplification | chr7  | q22.3           | 106,692,806 | 106,734,547 | 18 | 0.643033  | 2.55E-32  | COG5                     |
| Amplification | chr7  | q31.1           | 109,230,336 | 109,240,269 | 5  | 0.949619  | 1.44E-17  |                          |
| Deletion      | chr7  | q31.31          | 118,618,468 | 118,620,934 | 3  | -0.930246 | 7.81E-12  |                          |
| Deletion      | chr7  | q34             | 141,698,634 | 141,714,227 | 10 | -0.941581 | 4.22E-35  |                          |
| Deletion      | chr7  | q34             | 142,156,165 | 142,167,957 | 6  | -2.88635  | 1.03E-75  | TRY6                     |
| Deletion      | chr8  | p23.2           | 3,770,335   | 3,776,676   | 4  | -0.743278 | 2.44E-12  | CSMD1                    |
| Deletion      | chr8  | p23.1           | 9,535,456   | 9,538,090   | 3  | -0.882736 | 2.44E-10  | TNKS                     |
| Amplification | chr8  | p21.2           | 25,030,003  | 25,039,429  | 3  | 1.106577  | 1.52E-14  |                          |
| Amplification | chr8  | p11.23 - p11.22 | 39,352,361  | 39,505,315  | 59 | 3.789541  | NA        | ADAM5P, ADAM3A           |
| Amplification | chr8  | q11.22          | 51,193,977  | 51,200,350  | 4  | 1.117355  | 2.65E-21  | SNTG1                    |
| Deletion      | chr8  | q21.3           | 87,255,865  | 87,265,494  | 5  | -0.727513 | 4.02E-12  |                          |
| Amplification | chr9  | p24.1           | 6,692,831   | 6,698,349   | 3  | 1.103842  | 1.13E-12  |                          |
| Deletion      | chr9  | p21.3           | 23,353,267  | 23,365,985  | 3  | -1.038185 | 4.85E-15  |                          |
| Deletion      | chr9  | q31.3           | 111,609,722 | 111,616,469 | 3  | -0.976933 | 9.31E-12  | PALM2, PALM2-AKAP2       |
| Amplification | chr10 | p11.23          | 31,287,101  | 31,291,584  | 3  | 5.257664  | 9.86E-61  | ZNF438                   |
| Deletion      | chr10 | q21.3           | 70,952,973  | 70,960,246  | 4  | -1.017574 | 6.90E-17  |                          |
| Amplification | chr10 | q22.3           | 77,926,390  | 77,928,797  | 3  | 1.907613  | 1.34E-16  | C10orf11                 |
| Deletion      | chr10 | q25.2           | 113,201,227 | 113,343,540 | 32 | -0.924582 | 2.23E-105 |                          |
| Deletion      | chr10 | q26.13          | 124,337,128 | 124,340,415 | 3  | -1.043283 | 1.74E-10  | DMBT1                    |
| Deletion      | chr10 | q26.3           | 135,102,317 | 135,229,840 | 45 | -0.848754 | 1.94E-121 | LOC619207, CYP2E1, SYCE1 |
| Deletion      | chr11 | p15.4           | 7,771,593   | 7,783,551   | 8  | -1.069818 | 1.09E-33  | OR5P2                    |
| Deletion      | chr11 | q12.3           | 61,975,418  | 61,984,707  | 6  | -1.023788 | 1.09E-24  | AHNAK                    |

|               |       |        |             |             |     |           |           |                                                                                                       |
|---------------|-------|--------|-------------|-------------|-----|-----------|-----------|-------------------------------------------------------------------------------------------------------|
| Amplification | chr11 | q13.1  | 65,847,130  | 65,851,999  | 4   | 0.682737  | 2.64E-11  |                                                                                                       |
| Amplification | chr11 | q22.1  | 98,271,459  | 98,311,618  | 19  | 1.039115  | 3.74E-70  |                                                                                                       |
| Deletion      | chr11 | q22.3  | 106,744,337 | 106,747,979 | 4   | -0.889335 | 4.34E-15  | CWF19L2                                                                                               |
| Amplification | chr12 | p13.31 | 9,528,590   | 9,610,113   | 16  | 0.586081  | 6.70E-24  |                                                                                                       |
| Amplification | chr12 | p13.2  | 10,470,425  | 10,485,907  | 7   | 0.77523   | 1.16E-17  | KLRC2                                                                                                 |
| Amplification | chr12 | p13.2  | 11,121,204  | 11,140,477  | 7   | 0.829974  | 2.41E-18  | PRR4, PRH1, TAS2R43                                                                                   |
| Amplification | chr12 | q24.31 | 123,370,406 | 123,374,950 | 3   | 1.067298  | 1.75E-15  | NCOR2                                                                                                 |
| Deletion      | chr13 | q21.1  | 56,657,371  | 56,686,922  | 16  | -0.809584 | 1.76E-49  |                                                                                                       |
| Deletion      | chr14 | q21.3  | 43,571,616  | 43,597,724  | 5   | -0.990444 | 2.06E-22  |                                                                                                       |
| Deletion      | chr14 | q22.1  | 51,622,995  | 51,627,150  | 4   | -0.839475 | 3.81E-12  |                                                                                                       |
| Deletion      | chr14 | q24.1  | 69,088,190  | 69,092,270  | 3   | -1.054277 | 1.14E-14  |                                                                                                       |
| Deletion      | chr14 | q24.3  | 73,071,404  | 73,092,168  | 8   | -0.625063 | 2.32E-14  | HEATR4, ACOT1                                                                                         |
| Amplification | chr14 | q24.3  | 73,309,616  | 73,315,376  | 4   | 0.883783  | 2.99E-13  | C14orf43                                                                                              |
| Amplification | chr14 | q31.1  | 79,176,037  | 79,183,213  | 4   | 1.067485  | 1.41E-14  | NRXN3                                                                                                 |
| Amplification | chr14 | q32.33 | 105,403,001 | 105,441,928 | 11  | 3.185186  | 3.58E-135 |                                                                                                       |
| Amplification | chr14 | q32.33 | 105,403,001 | 105,416,455 | 7   | 4.619665  | 2.09E-13  |                                                                                                       |
| Amplification | chr14 | q32.33 | 105,460,029 | 105,474,067 | 8   | 0.566222  | 2.99E-11  | KIAA0125                                                                                              |
| Amplification | chr14 | q32.33 | 105,856,591 | 105,881,952 | 7   | 1.140804  | 1.71E-36  |                                                                                                       |
| Deletion      | chr14 | q32.33 | 106,219,784 | 106,253,703 | 16  | -0.549169 | 6.30E-24  |                                                                                                       |
| Amplification | chr15 | q11.2  | 18,427,151  | 20,088,315  | 155 | 0.389492  | 8.12E-108 | GOLGA6L6, GOLGA8C, BCL8, LOC646214, CXADRP2, POTEB, NF1P1, LOC727924, OR4M2, OR4N4, OR4N3P, LOC646396 |
| Amplification | chr15 | q24.3  | 74,671,626  | 74,680,498  | 4   | 2.661866  | 8.41E-40  | SCAPER                                                                                                |
| Amplification | chr15 | q25.2  | 81,095,411  | 81,253,557  | 74  | 0.974628  | 2.35E-255 | CPEB1, AP3B2, SCARNA15, FSD2                                                                          |
| Amplification | chr15 | q26.3  | 100,282,819 | 100,298,411 | 3   | 1.091948  | 1.66E-15  |                                                                                                       |
| Amplification | chr16 | p11.2  | 28,511,295  | 28,529,999  | 6   | 0.780037  | 1.23E-16  | SULT1A2, SULT1A1                                                                                      |
| Amplification | chr16 | p11.2  | 32,379,126  | 33,559,266  | 46  | 0.460547  | 6.95E-47  | TP53TG3B, TP53TG3, SLC6A10P, LOC390705                                                                |
| Deletion      | chr16 | q12.2  | 54,353,978  | 54,379,898  | 10  | -1.986659 | 1.82E-71  | CES4                                                                                                  |
| Deletion      | chr16 | q12.2  | 54,353,978  | 54,362,168  | 3   | -4.472836 | 4.18E-16  | CES4                                                                                                  |
| Deletion      | chr16 | q12.2  | 54,376,805  | 54,379,898  | 3   | -4.11516  | 2.06E-14  |                                                                                                       |
| Amplification | chr16 | q12.2  | 54,399,890  | 54,408,498  | 5   | 1.271509  | 1.39E-32  | CES1                                                                                                  |
| Deletion      | chr16 | q24.3  | 87,345,556  | 87,415,072  | 29  | -0.395744 | 5.17E-21  | FAM38A, CDT1, APRT, GALNS                                                                             |
| Amplification | chr17 | p11.2  | 21,119,904  | 21,192,211  | 30  | 0.38059   | 4.62E-22  | MAP2K3                                                                                                |
| Amplification | chr17 | q12    | 31,470,227  | 31,503,833  | 15  | 0.573667  | 3.78E-25  |                                                                                                       |
| Deletion      | chr17 | q21.31 | 41,521,544  | 41,710,444  | 67  | -1.017956 | 2.64E-286 | KIAA1267                                                                                              |
| Deletion      | chr17 | q25.2  | 72,297,674  | 72,303,380  | 3   | -1.157746 | 2.80E-15  |                                                                                                       |
| Deletion      | chr19 | p13.11 | 19,699,024  | 19,700,679  | 3   | -4.355717 | 6.60E-30  | ZNF14                                                                                                 |
| Amplification | chr19 | p12    | 20,422,223  | 20,507,294  | 15  | 0.762338  | 9.77E-30  |                                                                                                       |
| Deletion      | chr19 | q13.12 | 40,543,992  | 40,553,374  | 3   | -0.909276 | 1.57E-11  |                                                                                                       |
| Amplification | chr19 | q13.12 | 41,815,501  | 42,053,699  | 106 | 0.917351  | NA        | ZNF461, ZNF567, ZNF790, ZNF345                                                                        |
| Amplification | chr19 | q13.42 | 59,249,279  | 59,251,879  | 3   | 0.991117  | 7.25E-14  | VSTM1                                                                                                 |



|               |       |               |            |            |    |           |          |                    |
|---------------|-------|---------------|------------|------------|----|-----------|----------|--------------------|
| Deletion      | chr19 | q13.42        | 59,421,197 | 59,434,253 | 10 | -0.531077 | 7.60E-15 | LILRA6             |
| Deletion      | chr20 | p13           | 1,511,632  | 1,532,485  | 10 | -0.90736  | 5.61E-32 | SIRPB1             |
| Amplification | chr20 | q13.2         | 52,081,719 | 52,090,452 | 5  | 0.835426  | 4.46E-13 | BCAS1              |
| Amplification | chr21 | p11.2 - p11.1 | 9,882,922  | 10,022,365 | 10 | 1.061506  | 2.78E-47 | TPTE               |
| Deletion      | chr22 | q13.1         | 37,689,058 | 37,715,431 | 16 | -0.944271 | 5.70E-55 | APOBEC3A, APOBEC3B |
